# Supplementary material for: Salting-Out Approach Is Worthy of Comparison with Ultracentrifugation for Extracellular Vesicle Isolation from Tumor and Healthy Models
Source: MDPI journal article supplement (doi:10.3390/biom11121857), 2021-12-10
Supplement: s1 [file s1]

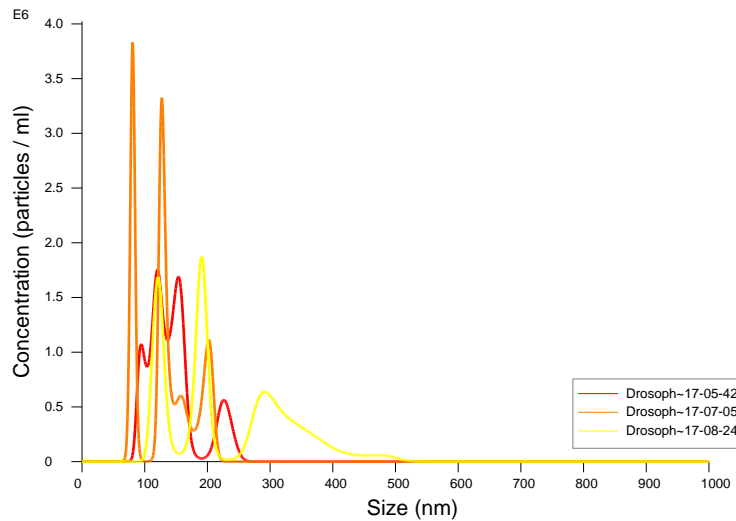

FTLA Concentration / Size graph for Experiment:  
Drosophila\_NaAc 2019-11-15 17-04-26

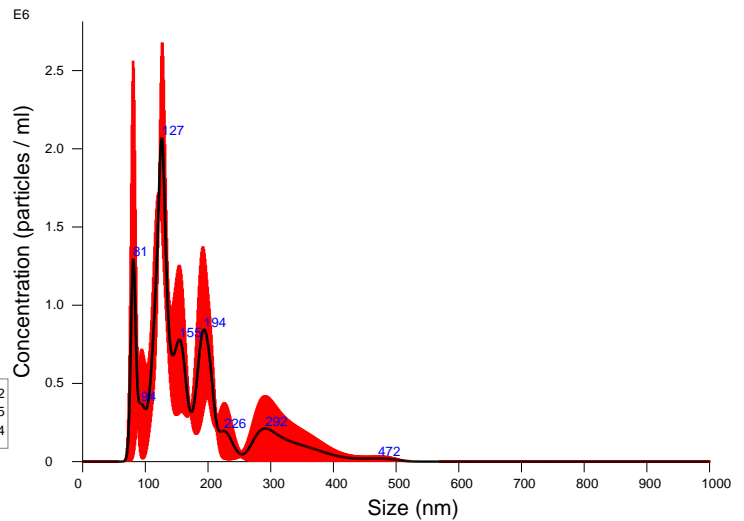

Averaged FTLA Concentration / Size for Experiment:  
Drosophila\_NaAc 2019-11-15 17-04-26  
Error bars indicate + / - 1 standard error of the mean

### Included Files

Drosophila\_NaAc 2019-11-15 17-05-42  
Drosophila\_NaAc 2019-11-15 17-07-05  
Drosophila\_NaAc 2019-11-15 17-08-24

### Details

NTA Version: NTA 3.2 Dev Build 3.2.16  
Script Used: SOP Standard Measurement 05-04-26PM 15~  
Time Captured: 17:04:26 15/11/2019  
Operator: Antonio  
Pre-treatment:  
Sample Name: Drosophila\_NaAc  
Diluent:  
Remarks:

### Capture Settings

Camera Type: sCMOS  
Laser Type: Green  
Camera Level: 14  
Slider Shutter: 1259  
Slider Gain: 366  
FPS: 25.0  
Number of Frames: 1498  
Temperature: 25.0 - 25.0 °C  
Viscosity: (Water) 0.9 cP  
Dilution factor: Dilution not recorded

### Analysis Settings

Detect Threshold: 5  
Blur Size: Auto  
Max Jump Distance: Auto: 9.6 - 14.0 pix

### Results

Stats: Merged Data

Mean: 172.3 nm  
Mode: 126.1 nm  
SD: 80.8 nm  
D10: 88.1 nm  
D50: 145.2 nm  
D90: 299.6 nm

Stats: Mean +/- Standard Error

Mean: 169.1 +/- 31.1 nm  
Mode: 130.7 +/- 32.2 nm  
SD: 59.7 +/- 18.4 nm  
D10: 97.7 +/- 11.4 nm  
D50: 153.2 +/- 21.3 nm  
D90: 259.6 +/- 51.1 nm  
Concentration: 1.32e+008 +/- 7.05e+006 particles/ml  
6.7 +/- 0.4 particles/frame  
7.7 +/- 0.2 centres/frame

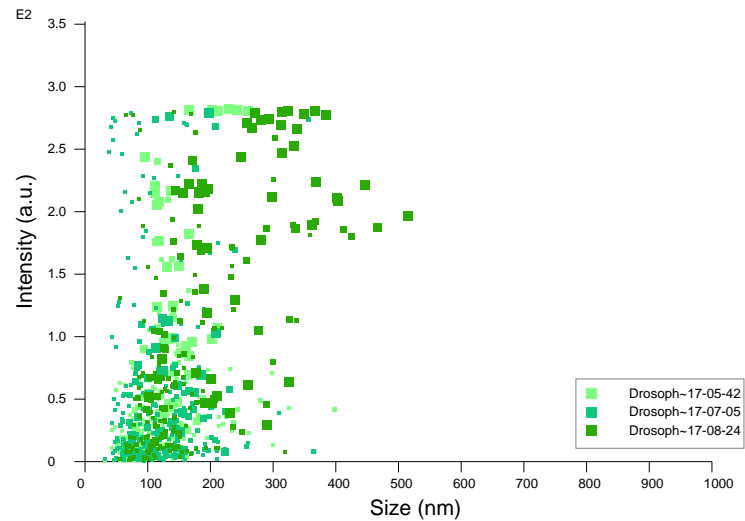

Intensity / Size graph for Experiment:  
Drosophila\_NaAc 2019-11-15 17-04-26

**Script Used: (Full Text):**

SOP Standard Measurement 05-04-26PM 15Nov2019.txt
