# Supplementary material for: Salting-Out Approach Is Worthy of Comparison with Ultracentrifugation for Extracellular Vesicle Isolation from Tumor and Healthy Models
Source: MDPI journal article supplement (doi:10.3390/biom11121857), 2021-12-10
Supplement: s1 [file s1]

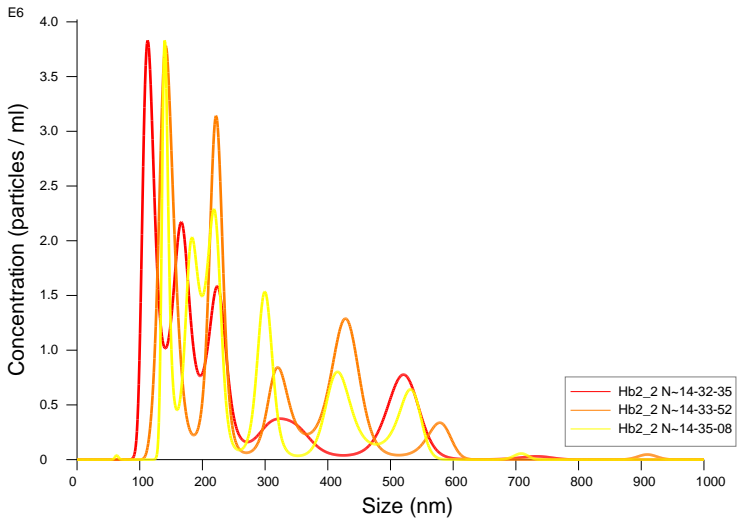

FTLA Concentration / Size graph for Experiment:  
Hb2\_2 NaAc 2020-02-17 14-32-09

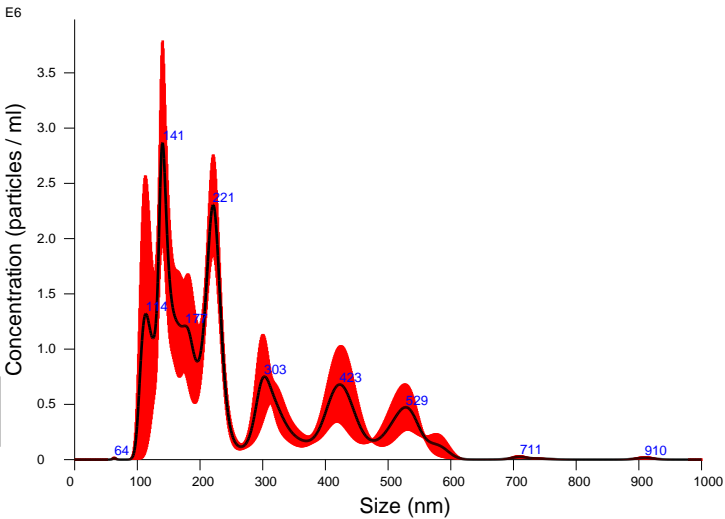

Averaged FTLA Concentration / Size for Experiment:  
Hb2\_2 NaAc 2020-02-17 14-32-09  
Error bars indicate + / - 1 standard error of the mean

|                                                                                                                                                                                                                                                                                                                                                                                                                                                                                                                                                                                                                                                                                                                                                                                                                                                                                                                                                                                                        |                                                                                                                                                                                                                                                                                                                                                                                                                                                                                                                                                                                                                       |
|--------------------------------------------------------------------------------------------------------------------------------------------------------------------------------------------------------------------------------------------------------------------------------------------------------------------------------------------------------------------------------------------------------------------------------------------------------------------------------------------------------------------------------------------------------------------------------------------------------------------------------------------------------------------------------------------------------------------------------------------------------------------------------------------------------------------------------------------------------------------------------------------------------------------------------------------------------------------------------------------------------|-----------------------------------------------------------------------------------------------------------------------------------------------------------------------------------------------------------------------------------------------------------------------------------------------------------------------------------------------------------------------------------------------------------------------------------------------------------------------------------------------------------------------------------------------------------------------------------------------------------------------|
| <div><div>Included Files</div><div>Hb2_2 NaAc 2020-02-17 14-32-35<br/>Hb2_2 NaAc 2020-02-17 14-33-52<br/>Hb2_2 NaAc 2020-02-17 14-35-08</div><div><div>Details</div><div><div>NTA Version:NTA 3.2 Dev Build 3.2.16</div><div>Script Used:SOP Standard Measurement 02-32-09PM 17~</div><div>Time Captured:14:32:09 17/02/2020</div><div>Operator:Antonio</div><div>Pre-treatment:</div><div>Sample Name:Hb2_2 NaAc</div><div>Diluent:</div><div>Remarks:</div></div><div><div>Capture Settings</div><div><div>Camera Type:sCMOS</div><div>Laser Type:Green</div><div>Camera Level:12</div><div>Slider Shutter:1200</div><div>Slider Gain:146</div><div>FPS:25.0</div><div>Number of Frames:1498</div><div>Temperature:22.0 °C</div><div>Viscosity:(Water) 1.0 cP</div><div>Dilution factor:Dilution not recorded</div></div><div><div>Analysis Settings</div><div><div>Detect Threshold:5</div><div>Blur Size:Auto</div><div>Max Jump Distance:Auto: 9.6 - 11.1 pix</div></div></div></div></div></div> | <div><div>Results</div><div><div>Stats: Merged Data</div><div><div>Mean:262.9 nm</div><div>Mode:140.2 nm</div><div>SD:137.6 nm</div><div>D10:128.2 nm</div><div>D50:216.1 nm</div><div>D90:487.0 nm</div></div><div><div>Stats: Mean +/- Standard Error</div><div><div>Mean:263.1 +/- 12.2 nm</div><div>Mode:131.3 +/- 9.3 nm</div><div>SD:136.1 +/- 4.8 nm</div><div>D10:129.3 +/- 9.6 nm</div><div>D50:208.4 +/- 14.1 nm</div><div>D90:483.5 +/- 19.2 nm</div><div>Concentration:3.26e+008 +/- 1.18e+007 particles/ml<br/>16.5 +/- 0.6 particles/frame<br/>20.5 +/- 0.3 centres/frame</div></div></div></div></div> |
|--------------------------------------------------------------------------------------------------------------------------------------------------------------------------------------------------------------------------------------------------------------------------------------------------------------------------------------------------------------------------------------------------------------------------------------------------------------------------------------------------------------------------------------------------------------------------------------------------------------------------------------------------------------------------------------------------------------------------------------------------------------------------------------------------------------------------------------------------------------------------------------------------------------------------------------------------------------------------------------------------------|-----------------------------------------------------------------------------------------------------------------------------------------------------------------------------------------------------------------------------------------------------------------------------------------------------------------------------------------------------------------------------------------------------------------------------------------------------------------------------------------------------------------------------------------------------------------------------------------------------------------------|

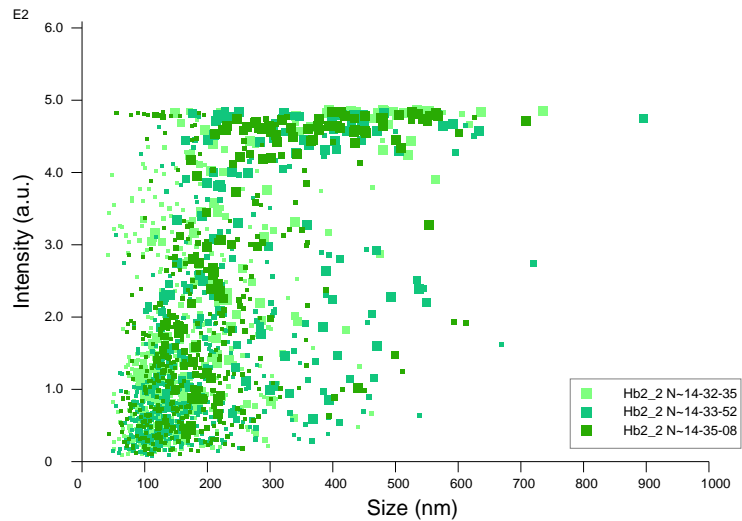

Intensity / Size graph for Experiment:  
Hb2\_2 NaAc 2020-02-17 14-32-09

**Script Used: (Full Text):**

SOP Standard Measurement 02-32-09PM 17Feb2020.txt
