# Supplementary material for: Salting-Out Approach Is Worthy of Comparison with Ultracentrifugation for Extracellular Vesicle Isolation from Tumor and Healthy Models
Source: MDPI journal article supplement (doi:10.3390/biom11121857), 2021-12-10
Supplement: s1 [file s1]

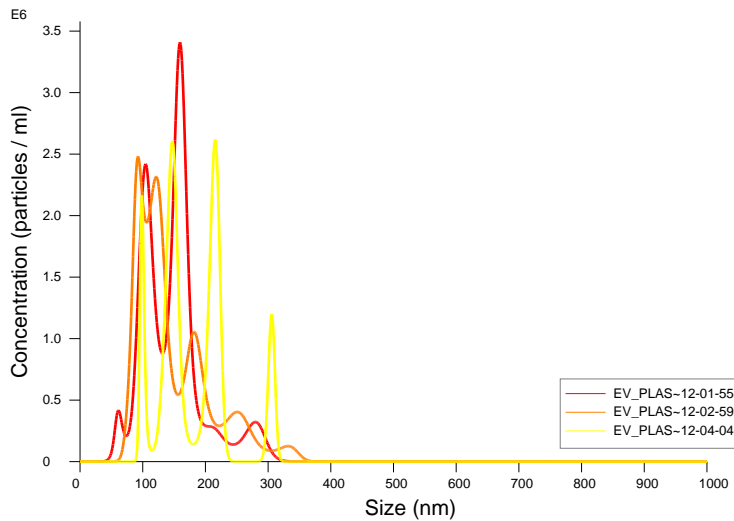

FTLA Concentration / Size graph for Experiment:  
EV\_PLASMA\_ULTRA\_PZ3 2021-09-03 12-01-47

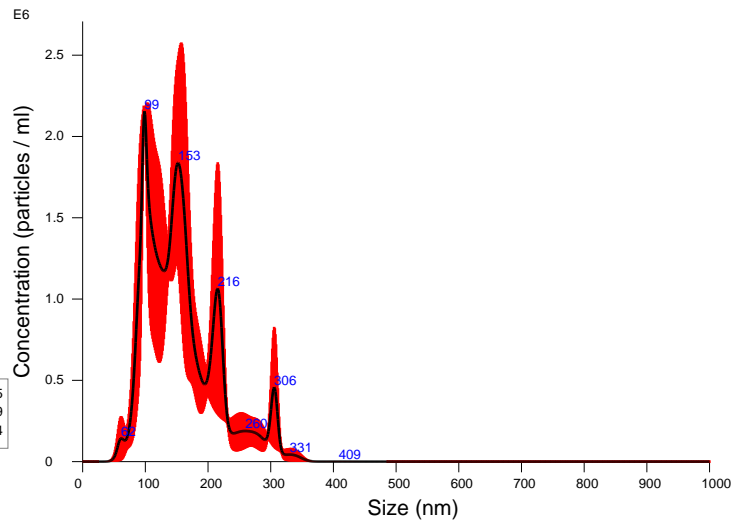

Averaged FTLA Concentration / Size for Experiment:  
EV\_PLASMA\_ULTRA\_PZ3 2021-09-03 12-01-47  
Error bars indicate + / - 1 standard error of the mean

## Included Files

EV\_PLASMA\_ULTRA\_PZ3 2021-09-03 12-01-55  
EV\_PLASMA\_ULTRA\_PZ3 2021-09-03 12-02-59  
EV\_PLASMA\_ULTRA\_PZ3 2021-09-03 12-04-04

## Details

NTA Version: NTA 3.2 Dev Build 3.2.16  
Script Used: SOP Standard Measurement 12-01-47PM 03~  
Time Captured: 12:01:47 03/09/2021  
Operator: simo  
Pre-treatment:  
Sample Name: EV\_PLASMA\_ULTRA\_PZ3  
Diluent:  
Remarks: 1:1000

## Capture Settings

Camera Type: sCMOS  
Laser Type: Green  
Camera Level: 14  
Slider Shutter: 1259  
Slider Gain: 366  
FPS: 25.0  
Number of Frames: 1498  
Temperature: 24.7 - 24.9 °C  
Viscosity: (Water) 0.892 - 0.894 cP  
Dilution factor: Dilution not recorded  
Syringe Pump Speed: 50

## Analysis Settings

Detect Threshold: 5  
Blur Size: Auto  
Max Jump Distance: Auto: 11.5 - 16.5 pix

## Results

Stats: Merged Data

Mean: 156.8 nm  
Mode: 98.7 nm  
SD: 57.6 nm  
D10: 93.9 nm  
D50: 146.7 nm  
D90: 229.4 nm

Stats: Mean +/- Standard Error

Mean: 158.8 +/- 11.1 nm  
Mode: 155.8 +/- 35.6 nm  
SD: 55.7 +/- 3.1 nm  
D10: 94.6 +/- 4.0 nm  
D50: 145.0 +/- 10.1 nm  
D90: 246.1 +/- 23.5 nm  
Concentration: 1.93e+008 +/- 1.77e+007 particles/ml  
9.8 +/- 0.9 particles/frame  
11.5 +/- 1.1 centres/frame

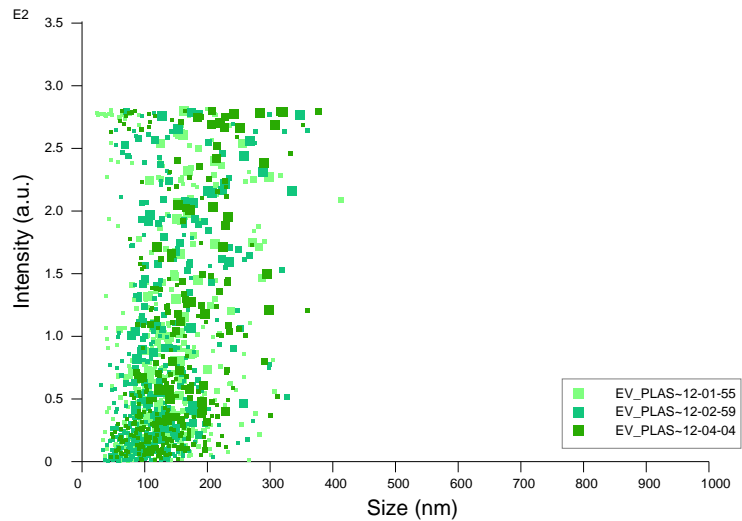

Intensity / Size graph for Experiment:  
EV\_PLASMA\_ULTRA\_PZ3 2021-09-03 12-01-47

**Script Used: (Full Text):**

SOP Standard Measurement 12-01-47PM 03Sep2021.txt
