# Supplementary material for: Salting-Out Approach Is Worthy of Comparison with Ultracentrifugation for Extracellular Vesicle Isolation from Tumor and Healthy Models
Source: MDPI journal article supplement (doi:10.3390/biom11121857), 2021-12-10
Supplement: s1 [file s1]

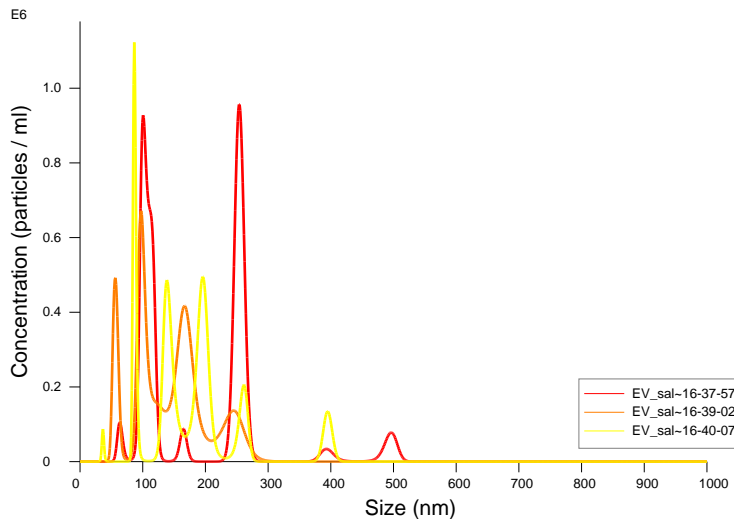

FTLA Concentration / Size graph for Experiment:  
EV\_saliva\_S-O\_pz2 2021-09-02 16-37-47

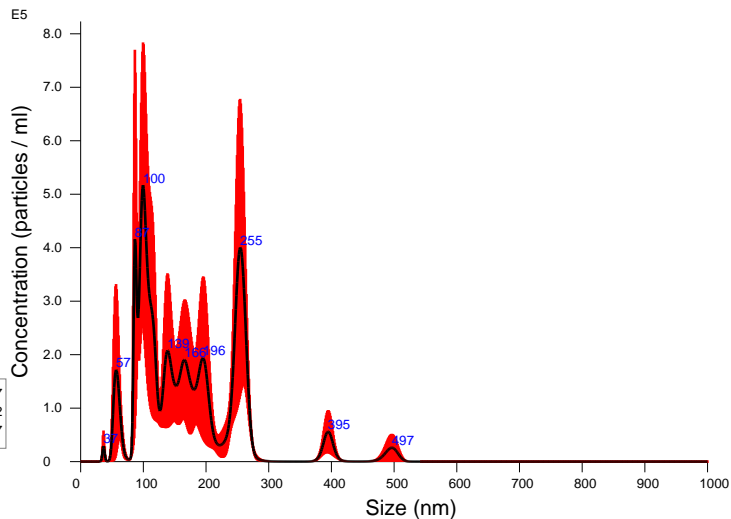

Averaged FTLA Concentration / Size for Experiment:  
EV\_saliva\_S-O\_pz2 2021-09-02 16-37-47  
Error bars indicate + / - 1 standard error of the mean

### Included Files

EV\_saliva\_S-O\_pz2 2021-09-02 16-37-57  
EV\_saliva\_S-O\_pz2 2021-09-02 16-39-02  
EV\_saliva\_S-O\_pz2 2021-09-02 16-40-07

### Details

NTA Version: NTA 3.2 Dev Build 3.2.16  
Script Used: SOP Standard Measurement 04-37-47PM 02~  
Time Captured: 16:37:47 02/09/2021  
Operator: simo  
Pre-treatment:  
Sample Name: EV\_saliva\_S-O\_pz2  
Diluent:  
Remarks: 1:1000

### Capture Settings

Camera Type: sCMOS  
Laser Type: Green  
Camera Level: 14  
Slider Shutter: 1259  
Slider Gain: 366  
FPS: 25.0  
Number of Frames: 1498  
Temperature: 26.5 °C  
Viscosity: (Water) 0.858 - 0.859 cP  
Dilution factor: Dilution not recorded  
Syringe Pump Speed: 50

### Analysis Settings

Detect Threshold: 5  
Blur Size: Auto  
Max Jump Distance: Auto: 14.0 - 32.3 pix

### Results

Stats: Merged Data

Mean: 170.9 nm  
Mode: 99.5 nm  
SD: 85.2 nm  
D10: 87.0 nm  
D50: 152.5 nm  
D90: 259.5 nm

Stats: Mean +/- Standard Error

Mean: 170.8 +/- 14.8 nm  
Mode: 146.0 +/- 54.1 nm  
SD: 79.9 +/- 12.7 nm  
D10: 80.5 +/- 11.2 nm  
D50: 158.6 +/- 9.1 nm  
D90: 253.7 +/- 9.9 nm  
Concentration: 4.10e+007 +/- 2.75e+006 particles/ml  
2.1 +/- 0.1 particles/frame  
2.5 +/- 0.2 centres/frame

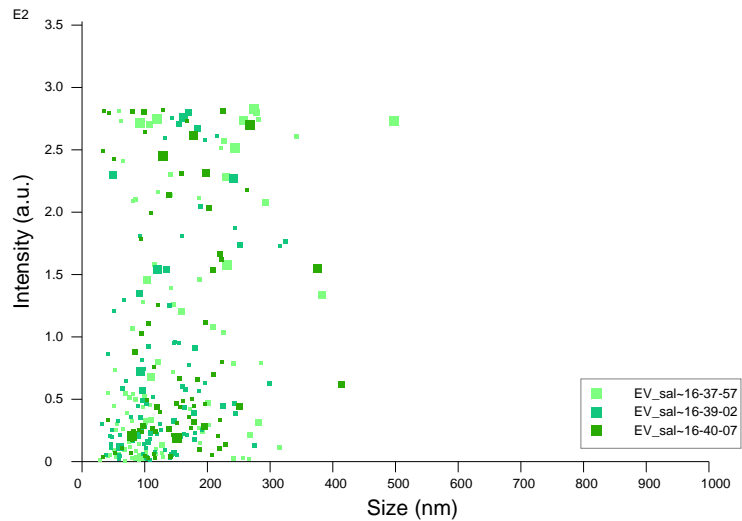

Intensity / Size graph for Experiment:  
EV\_saliva\_S-O\_pz2 2021-09-02 16-37-47

**Script Used: (Full Text):**

SOP Standard Measurement 04-37-47PM 02Sep2021.txt
