# Supplementary material for: Salting-Out Approach Is Worthy of Comparison with Ultracentrifugation for Extracellular Vesicle Isolation from Tumor and Healthy Models
Source: MDPI journal article supplement (doi:10.3390/biom11121857), 2021-12-10
Supplement: s1 [file s1]

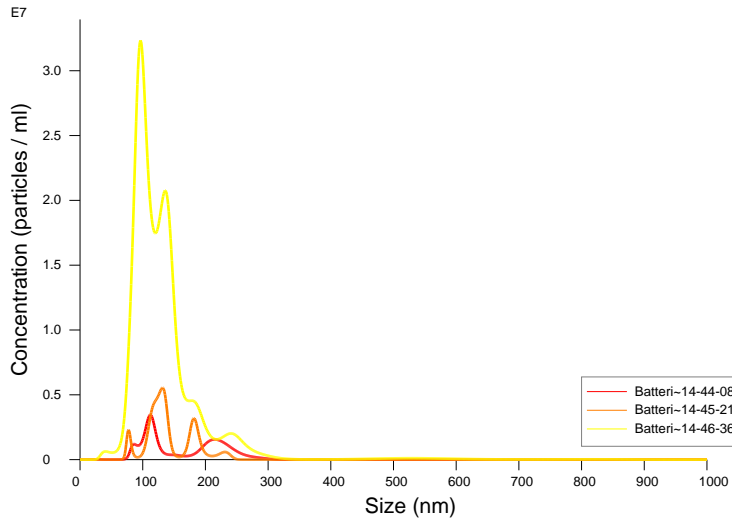

FTLA Concentration / Size graph for Experiment:  
Batteri LE392 Ultra 2020-02-17 14-43-44

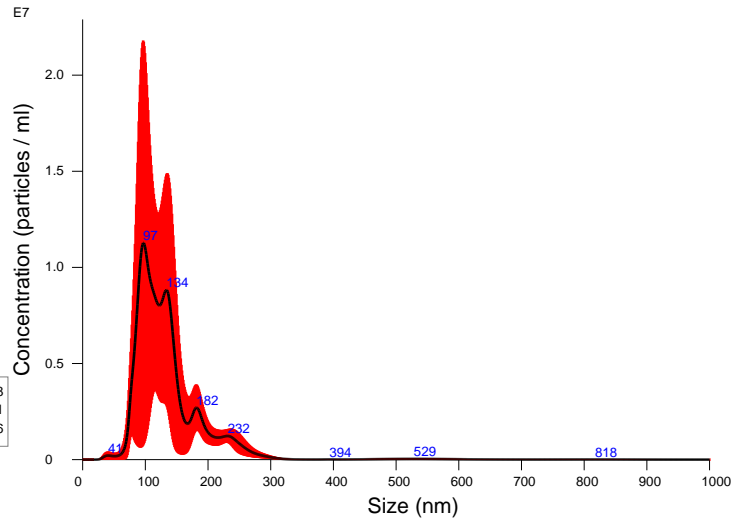

Averaged FTLA Concentration / Size for Experiment:  
Batteri LE392 Ultra 2020-02-17 14-43-44  
Error bars indicate + / - 1 standard error of the mean

### Included Files

Batteri LE392 Ultra 2020-02-17 14-44-08  
Batteri LE392 Ultra 2020-02-17 14-45-21  
Batteri LE392 Ultra 2020-02-17 14-46-36

### Details

NTA Version: NTA 3.2 Dev Build 3.2.16  
Script Used: SOP Standard Measurement 02-43-44PM 17~  
Time Captured: 14:43:44 17/02/2020  
Operator: Antonio  
Pre-treatment:  
Sample Name: Batteri LE392 Ultra  
Diluent:  
Remarks:

### Capture Settings

Camera Type: sCMOS  
Laser Type: Green  
Camera Level: 13 - 14  
Slider Shutter: 1232 - 1259  
Slider Gain: 219 - 366  
FPS: 25.0  
Number of Frames: 1498  
Temperature: 22.0 °C  
Viscosity: (Water) 1.0 cP  
Dilution factor: Dilution not recorded

### Analysis Settings

Detect Threshold: 5  
Blur Size: Auto  
Max Jump Distance: Auto: 11.9 - 14.4 pix

### Results

Stats: Merged Data

Mean: 135.8 nm  
Mode: 97.0 nm  
SD: 63.2 nm  
D10: 86.2 nm  
D50: 121.0 nm  
D90: 201.5 nm

Stats: Mean +/- Standard Error

Mean: 145.8 +/- 9.3 nm  
Mode: 113.4 +/- 10.1 nm  
SD: 54.6 +/- 8.1 nm  
D10: 94.6 +/- 5.1 nm  
D50: 131.3 +/- 8.3 nm  
D90: 206.1 +/- 17.4 nm  
Concentration: 8.32e+008 +/- 5.93e+008 particles/ml  
42.2 +/- 30.1 particles/frame  
60.7 +/- 47.3 centres/frame

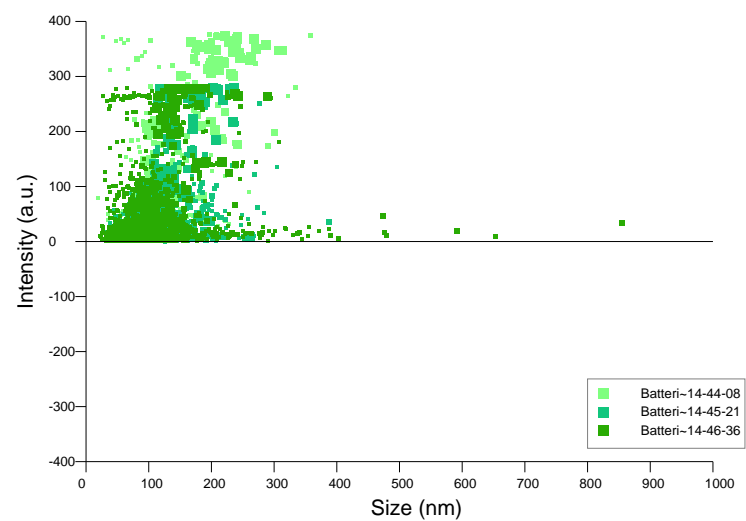

Intensity / Size graph for Experiment:  
Batteri LE392 Ultra 2020-02-17 14-43-44

**Script Used: (Full Text):**

SOP Standard Measurement 02-43-44PM 17Feb2020.txt
