# Supplementary material for: Salting-Out Approach Is Worthy of Comparison with Ultracentrifugation for Extracellular Vesicle Isolation from Tumor and Healthy Models
Source: MDPI journal article supplement (doi:10.3390/biom11121857), 2021-12-10
Supplement: s1 [file s1]

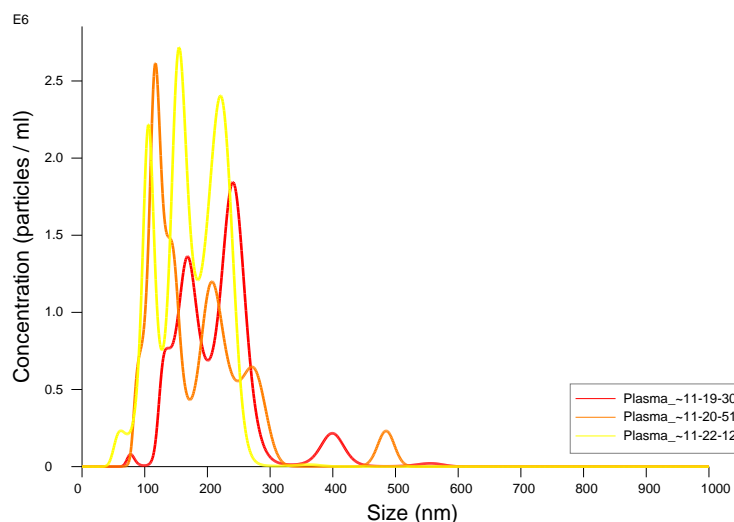

FTLA Concentration / Size graph for Experiment:  
Plasma\_NaAc 2019-11-20 11-19-01

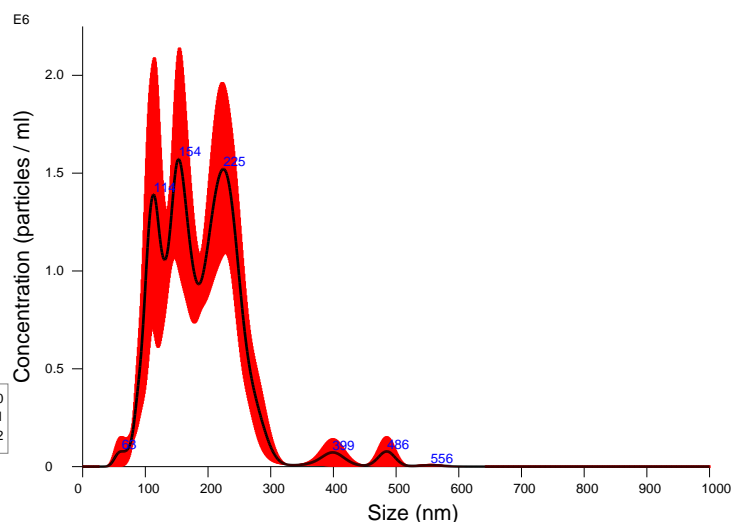

Averaged FTLA Concentration / Size for Experiment:  
Plasma\_NaAc 2019-11-20 11-19-01  
Error bars indicate + / - 1 standard error of the mean

### Included Files

Plasma\_NaAc 2019-11-20 11-19-30  
Plasma\_NaAc 2019-11-20 11-20-51  
Plasma\_NaAc 2019-11-20 11-22-12

### Details

NTA Version: NTA 3.2 Dev Build 3.2.16  
Script Used: SOP Standard Measurement 11-19-01AM 20~  
Time Captured: 11:19:01 20/11/2019  
Operator: Antonio  
Pre-treatment:  
Sample Name: Plasma\_NaAc  
Diluent:  
Remarks:

### Capture Settings

Camera Type: sCMOS  
Laser Type: Green  
Camera Level: 13  
Slider Shutter: 1232  
Slider Gain: 219  
FPS: 25.0  
Number of Frames: 1498  
Temperature: 23.0 °C  
Viscosity: (Water) 0.9 cP  
Dilution factor: Dilution not recorded

### Analysis Settings

Detect Threshold: 5  
Blur Size: Auto  
Max Jump Distance: Auto: 11.3 - 13.1 pix

### Results

Stats: Merged Data

Mean: 187.6 nm  
Mode: 153.0 nm  
SD: 69.6 nm  
D10: 108.0 nm  
D50: 180.3 nm  
D90: 255.9 nm

Stats: Mean +/- Standard Error

Mean: 190.9 +/- 14.2 nm  
Mode: 170.8 +/- 36.6 nm  
SD: 67.2 +/- 9.4 nm  
D10: 116.9 +/- 13.0 nm  
D50: 180.6 +/- 19.0 nm  
D90: 259.5 +/- 13.5 nm  
Concentration: 2.30e+008 +/- 3.05e+007 particles/ml  
11.7 +/- 1.5 particles/frame  
20.1 +/- 5.0 centres/frame

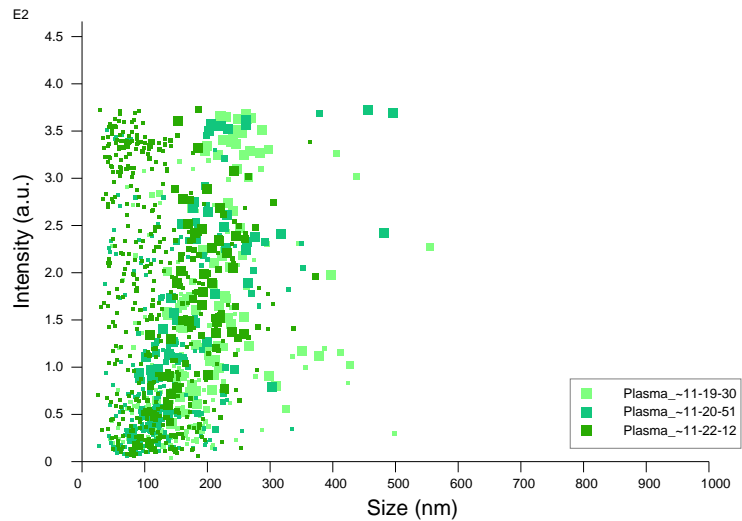

Intensity / Size graph for Experiment:  
Plasma\_NaAc 2019-11-20 11-19-01

**Script Used: (Full Text):**

SOP Standard Measurement 11-19-01AM 20Nov2019.txt
