# Supplementary material for: Salting-Out Approach Is Worthy of Comparison with Ultracentrifugation for Extracellular Vesicle Isolation from Tumor and Healthy Models
Source: MDPI journal article supplement (doi:10.3390/biom11121857), 2021-12-10
Supplement: s1 [file s1]

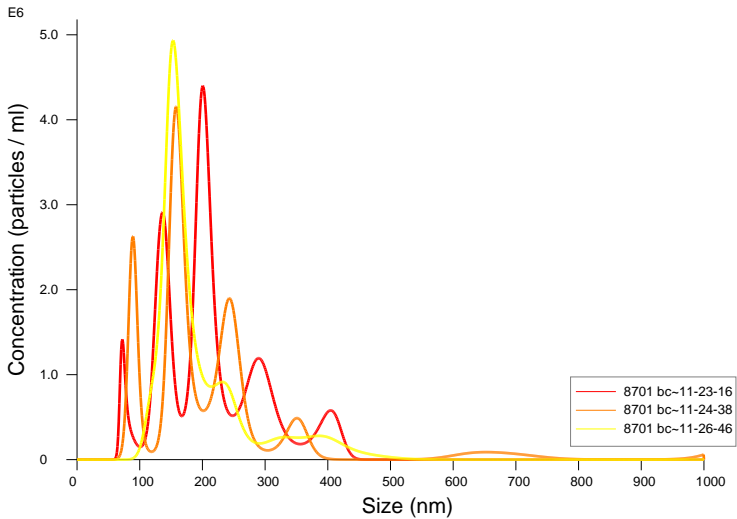

FTLA Concentration / Size graph for Experiment:  
8701 bc\_U 2019-11-21 11-22-08

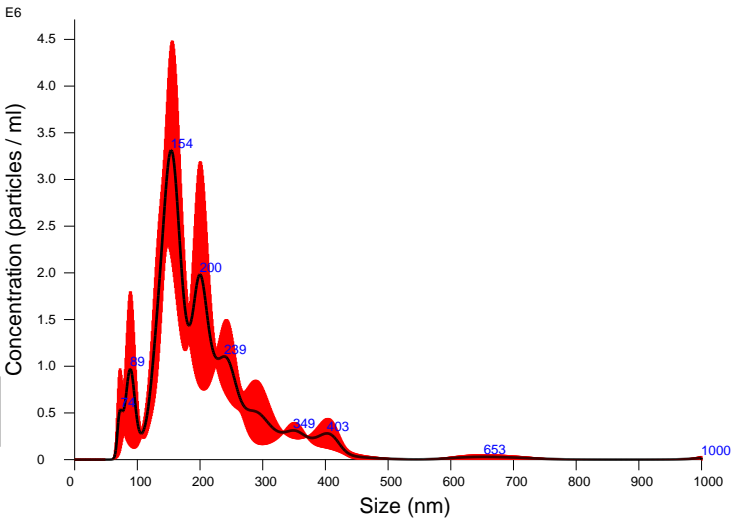

Averaged FTLA Concentration / Size for Experiment:  
8701 bc\_U 2019-11-21 11-22-08  
Error bars indicate + / - 1 standard error of the mean

**Included Files**

8701 bc\_U 2019-11-21 11-23-16  
8701 bc\_U 2019-11-21 11-24-38  
8701 bc\_U 2019-11-21 11-26-46

**Details**

NTA Version: NTA 3.2 Dev Build 3.2.16  
Script Used: SOP Standard Measurement 11-22-08AM 21~  
Time Captured: 11:22:08 21/11/2019  
Operator: Antonio  
Pre-treatment:  
Sample Name: 8701 bc\_U  
Diluent:  
Remarks:

**Capture Settings**

Camera Type: sCMOS  
Laser Type: Green  
Camera Level: 12  
Slider Shutter: 1200  
Slider Gain: 146  
FPS: 25.0  
Number of Frames: 1498  
Temperature: 21.2 - 21.4 °C  
Viscosity: (Water) 0.966 - 0.971 cP  
Dilution factor: Dilution not recorded

**Analysis Settings**

Detect Threshold: 11  
Blur Size: Auto  
Max Jump Distance: Auto: 9.3 - 10.9 pix

**Results**

Stats: Merged Data

Mean: 207.0 nm  
Mode: 154.0 nm  
SD: 97.3 nm  
D10: 123.5 nm  
D50: 182.2 nm  
D90: 325.9 nm

Stats: Mean +/- Standard Error

Mean: 206.7 +/- 4.8 nm  
Mode: 170.6 +/- 15.1 nm  
SD: 95.5 +/- 15.4 nm  
D10: 116.6 +/- 13.0 nm  
D50: 179.0 +/- 10.8 nm  
D90: 326.5 +/- 2.6 nm  
Concentration: 3.36e+008 +/- 1.68e+007 particles/ml  
17.0 +/- 0.9 particles/frame  
23.5 +/- 1.3 centres/frame

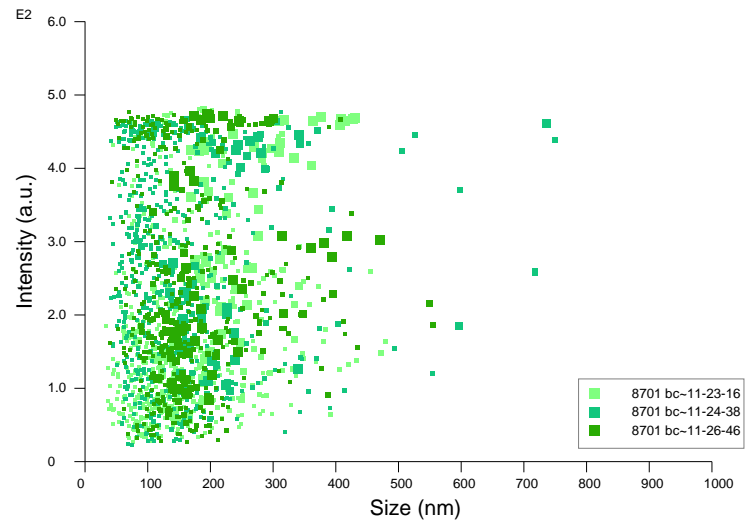

Intensity / Size graph for Experiment:  
8701 bc\_U 2019-11-21 11-22-08

**Script Used: (Full Text):**

SOP Standard Measurement 11-22-08AM 21Nov2019.txt
