# Supplementary material for: Salting-Out Approach Is Worthy of Comparison with Ultracentrifugation for Extracellular Vesicle Isolation from Tumor and Healthy Models
Source: MDPI journal article supplement (doi:10.3390/biom11121857), 2021-12-10
Supplement: s1 [file s1]

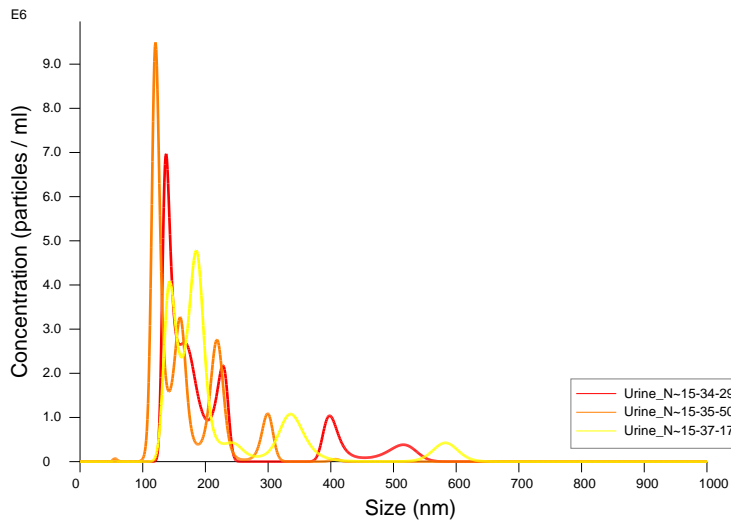

FTLA Concentration / Size graph for Experiment:  
Urine\_NaAC\_Centr 2019-11-19 15-33-56

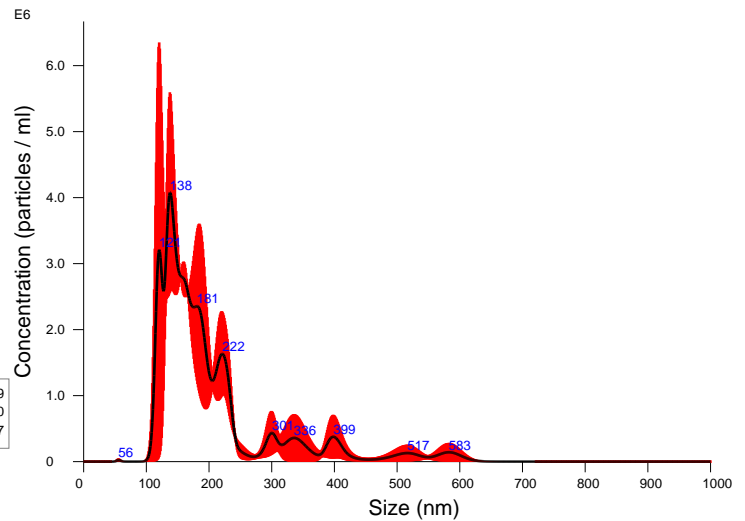

Averaged FTLA Concentration / Size for Experiment:  
Urine\_NaAC\_Centr 2019-11-19 15-33-56  
Error bars indicate + / - 1 standard error of the mean

### Included Files

Urine\_NaAC\_Centr 2019-11-19 15-34-29  
Urine\_NaAC\_Centr 2019-11-19 15-35-50  
Urine\_NaAC\_Centr 2019-11-19 15-37-17

### Details

NTA Version: NTA 3.2 Dev Build 3.2.16  
Script Used: SOP Standard Measurement 03-33-56PM 19~  
Time Captured: 15:33:56 19/11/2019  
Operator: Antonio  
Pre-treatment:  
Sample Name: Urine\_NaAC\_Centr  
Diluent:  
Remarks:

### Capture Settings

Camera Type: sCMOS  
Laser Type: Green  
Camera Level: 14  
Slider Shutter: 1259  
Slider Gain: 366  
FPS: 25.0  
Number of Frames: 1498  
Temperature: 28.0 - 28.0 °C  
Viscosity: (Water) 0.831 - 0.832 cP  
Dilution factor: Dilution not recorded

### Analysis Settings

Detect Threshold: 9  
Blur Size: Auto  
Max Jump Distance: Auto: 9.4 - 10.8 pix

### Results

Stats: Merged Data

Mean: 202.0 nm  
Mode: 138.0 nm  
SD: 99.7 nm  
D10: 122.9 nm  
D50: 168.5 nm  
D90: 339.8 nm

Stats: Mean +/- Standard Error

Mean: 202.0 +/- 18.6 nm  
Mode: 147.6 +/- 19.5 nm  
SD: 92.4 +/- 18.9 nm  
D10: 129.7 +/- 7.4 nm  
D50: 166.4 +/- 10.7 nm  
D90: 330.2 +/- 52.5 nm  
Concentration: 3.52e+008 +/- 6.90e+006 particles/ml  
17.9 +/- 0.4 particles/frame  
23.7 +/- 0.5 centres/frame

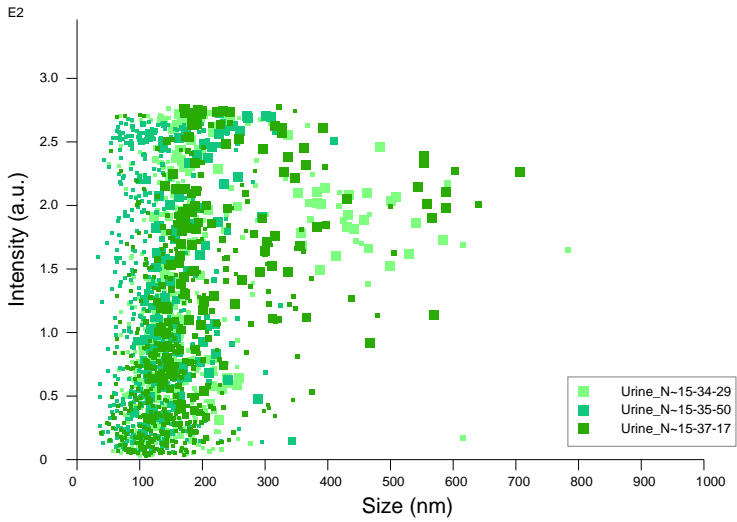

Intensity / Size graph for Experiment:  
Urine\_NaAC\_Centr 2019-11-19 15-33-56

**Script Used: (Full Text):**

SOP Standard Measurement 03-33-56PM 19Nov2019.txt
