# Supplementary material for: Salting-Out Approach Is Worthy of Comparison with Ultracentrifugation for Extracellular Vesicle Isolation from Tumor and Healthy Models
Source: MDPI journal article supplement (doi:10.3390/biom11121857), 2021-12-10
Supplement: s1 [file s1]

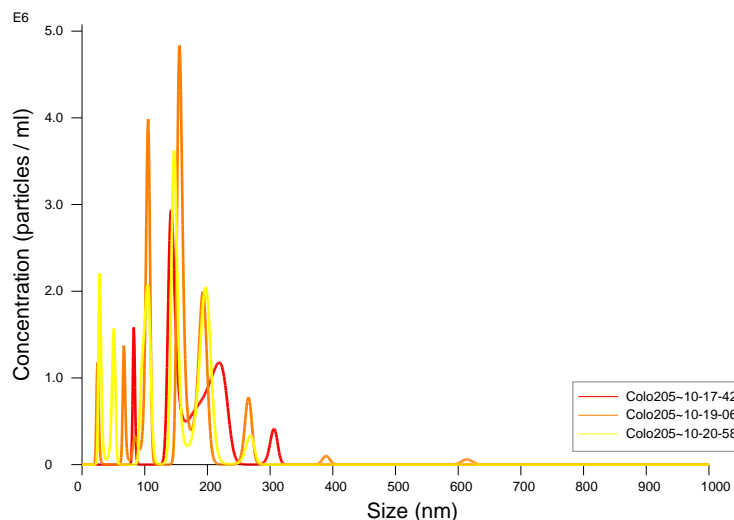

FTLA Concentration / Size graph for Experiment:  
Colo205\_NaAC 2019-10-23 10-15-51

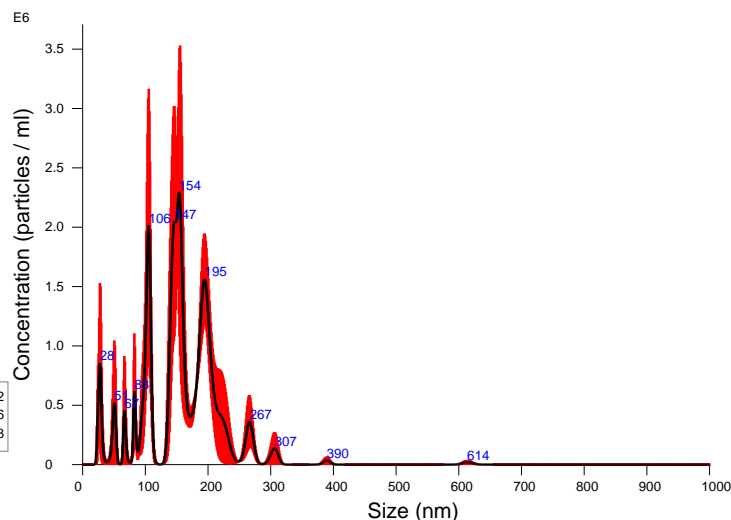

Averaged FTLA Concentration / Size for Experiment:  
Colo205\_NaAC 2019-10-23 10-15-51  
Error bars indicate + / - 1 standard error of the mean

### Included Files

Colo205\_NaAC 2019-10-23 10-17-42  
Colo205\_NaAC 2019-10-23 10-19-06  
Colo205\_NaAC 2019-10-23 10-20-58

### Details

NTA Version: NTA 3.2 Dev Build 3.2.16  
Script Used: SOP Standard Measurement 10-15-51AM 230~  
Time Captured: 10:15:51 23/10/2019  
Operator: Antonio  
Pre-treatment:  
Sample Name: Colo205\_NaAC  
Diluent:  
Remarks:

### Capture Settings

Camera Type: sCMOS  
Laser Type: Green  
Camera Level: 15  
Slider Shutter: 1206  
Slider Gain: 366  
FPS: 25.0  
Number of Frames: 1498  
Temperature: 21.7 - 21.8 °C  
Viscosity: (Water) 0.957 - 0.961 cP  
Dilution factor: Dilution not recorded

### Analysis Settings

Detect Threshold: 9  
Blur Size: Auto  
Max Jump Distance: Auto: 13.3 - 19.5 pix

### Results

Stats: Merged Data

Mean: 158.2 nm  
Mode: 154.0 nm  
SD: 62.7 nm  
D10: 84.1 nm  
D50: 154.3 nm  
D90: 218.6 nm

Stats: Mean +/- Standard Error

Mean: 159.8 +/- 11.2 nm  
Mode: 148.2 +/- 3.9 nm  
SD: 59.3 +/- 6.4 nm  
D10: 91.8 +/- 25.6 nm  
D50: 159.5 +/- 8.8 nm  
D90: 211.3 +/- 9.0 nm  
Concentration: 1.44e+008 +/- 1.16e+007 particles/ml  
7.3 +/- 0.6 particles/frame  
11.6 +/- 2.6 centres/frame

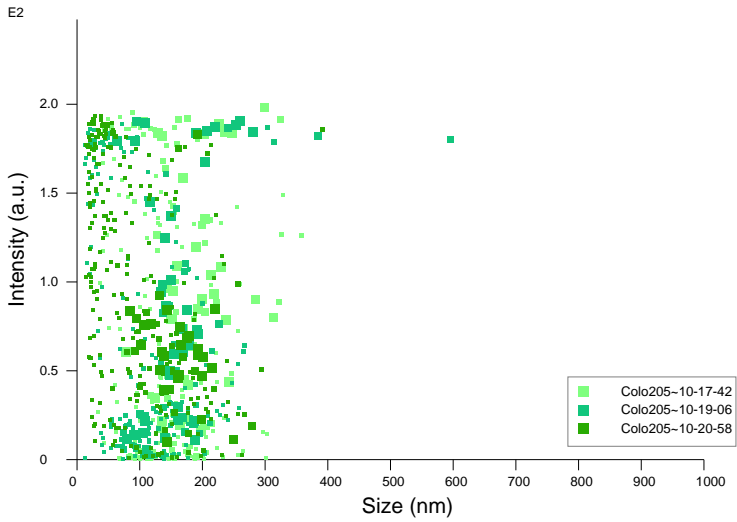

Intensity / Size graph for Experiment:  
Colo205\_NaAC 2019-10-23 10-15-51

**Script Used: (Full Text):**

SOP Standard Measurement 10-15-51AM 23Oct2019.txt
