# Supplementary material for: Salting-Out Approach Is Worthy of Comparison with Ultracentrifugation for Extracellular Vesicle Isolation from Tumor and Healthy Models
Source: MDPI journal article supplement (doi:10.3390/biom11121857), 2021-12-10
Supplement: s1 [file s1]

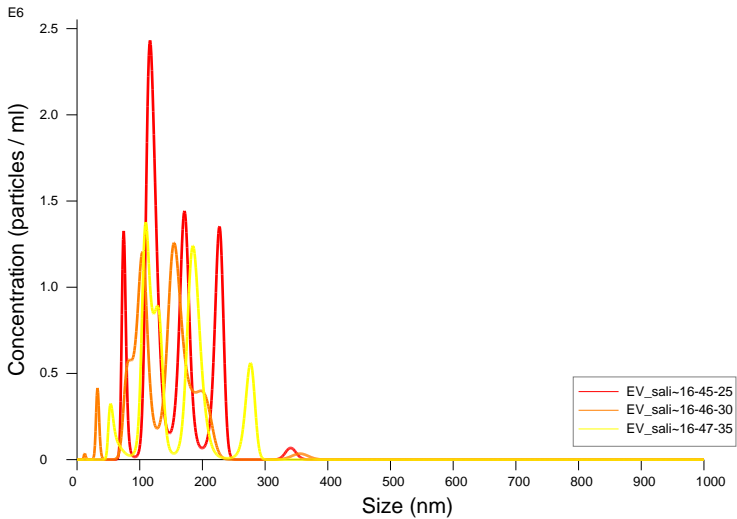

FTLA Concentration / Size graph for Experiment:  
EV\_saliva\_UC\_pz2 OK 2021-09-02 16-45-16

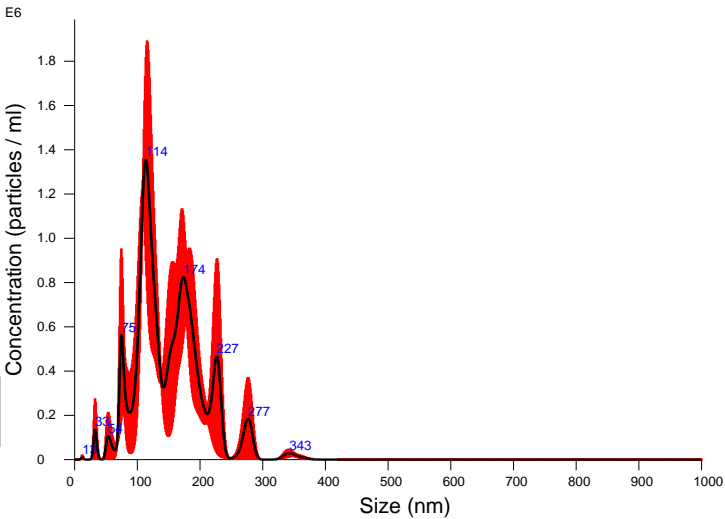

Averaged FTLA Concentration / Size for Experiment:  
EV\_saliva\_UC\_pz2 OK 2021-09-02 16-45-16  
Error bars indicate + / - 1 standard error of the mean

## Included Files

EV\_saliva\_UC\_pz2 OK 2021-09-02 16-45-25  
EV\_saliva\_UC\_pz2 OK 2021-09-02 16-46-30  
EV\_saliva\_UC\_pz2 OK 2021-09-02 16-47-35

## Details

NTA Version: NTA 3.2 Dev Build 3.2.16  
Script Used: SOP Standard Measurement 04-45-16PM 02~  
Time Captured: 16:45:16 02/09/2021  
Operator: simo  
Pre-treatment:  
Sample Name: EV\_saliva\_UC\_pz2 OK  
Diluent:  
Remarks: 1:1000

## Capture Settings

Camera Type: sCMOS  
Laser Type: Green  
Camera Level: 14  
Slider Shutter: 1259  
Slider Gain: 366  
FPS: 25.0  
Number of Frames: 1498  
Temperature: 26.5 °C  
Viscosity: (Water) 0.858 - 0.859 cP  
Dilution factor: Dilution not recorded  
Syringe Pump Speed: 50

## Analysis Settings

Detect Threshold: 5  
Blur Size: Auto  
Max Jump Distance: Auto: 14.9 - 22.8 pix

## Results

Stats: Merged Data

Mean: 150.9 nm  
Mode: 113.5 nm  
SD: 53.6 nm  
D10: 90.8 nm  
D50: 142.8 nm  
D90: 222.2 nm

Stats: Mean +/- Standard Error

Mean: 150.9 +/- 6.2 nm  
Mode: 127.0 +/- 14.1 nm  
SD: 53.0 +/- 2.7 nm  
D10: 95.9 +/- 6.1 nm  
D50: 142.8 +/- 4.2 nm  
D90: 229.6 +/- 21.0 nm  
Concentration: 9.80e+007 +/- 9.14e+006 particles/ml  
5.0 +/- 0.5 particles/frame  
6.4 +/- 0.5 centres/frame

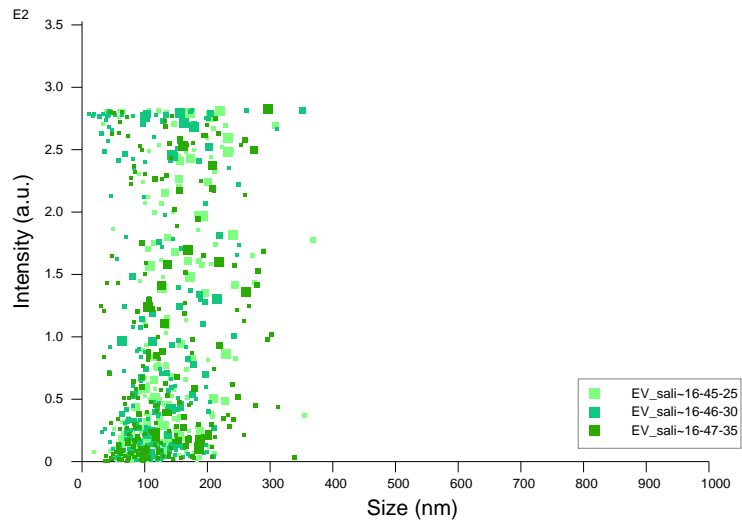

Intensity / Size graph for Experiment:  
EV\_saliva\_UC\_pz2 OK 2021-09-02 16-45-16

**Script Used: (Full Text):**

SOP Standard Measurement 04-45-16PM 02Sep2021.txt
