# Supplementary material for: Salting-Out Approach Is Worthy of Comparison with Ultracentrifugation for Extracellular Vesicle Isolation from Tumor and Healthy Models
Source: MDPI journal article supplement (doi:10.3390/biom11121857), 2021-12-10
Supplement: s1 [file s1]

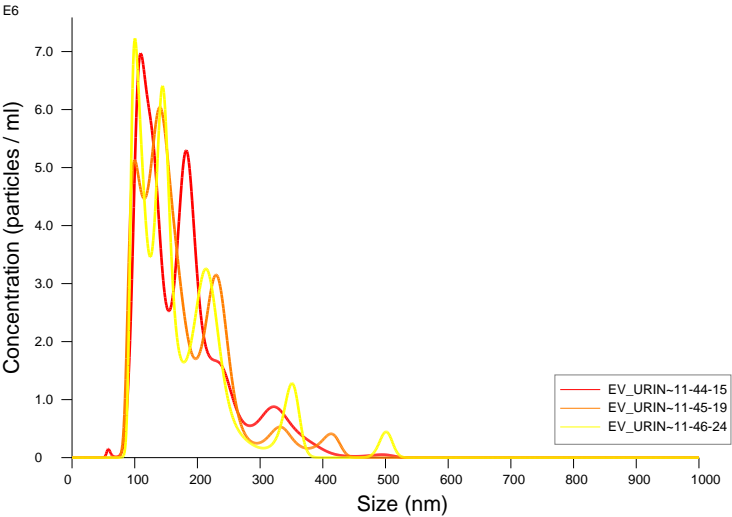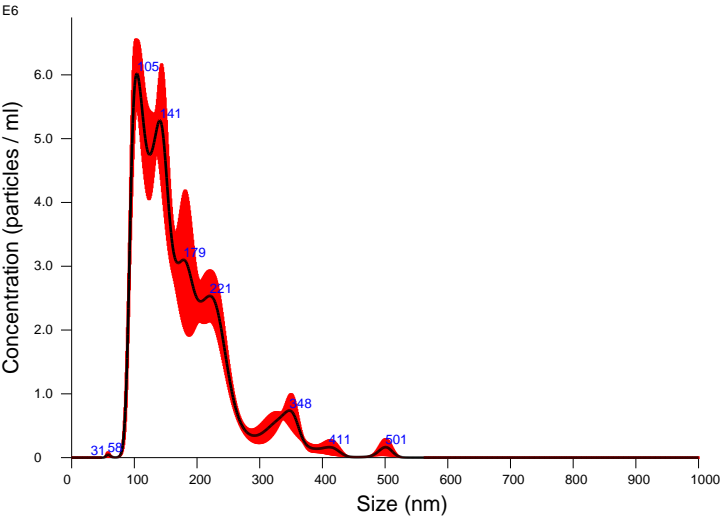

Included Files

EV\_URINE\_ULTRA\_PZ3 2021-09-03 11-44-15  
EV\_URINE\_ULTRA\_PZ3 2021-09-03 11-45-19  
EV\_URINE\_ULTRA\_PZ3 2021-09-03 11-46-24

Details

NTA Version: NTA 3.2 Dev Build 3.2.16  
Script Used: SOP Standard Measurement 11-44-07AM 03~  
Time Captured: 11:44:07 03/09/2021  
Operator: simo  
Pre-treatment:  
Sample Name: EV\_URINE\_ULTRA\_PZ3  
Diluent:  
Remarks: 1:1000

Capture Settings

Camera Type: sCMOS  
Laser Type: Green  
Camera Level: 14  
Slider Shutter: 1259  
Slider Gain: 366  
FPS: 25.0  
Number of Frames: 1498  
Temperature: 24.1 - 24.2 °C  
Viscosity: (Water) 0.904 - 0.907 cP  
Dilution factor: Dilution not recorded  
Syringe Pump Speed: 50

Analysis Settings

Detect Threshold: 5  
Blur Size: Auto  
Max Jump Distance: Auto: 11.2 - 12.1 pix

Results

Stats: Merged Data  
Mean: 175.7 nm  
Mode: 104.0 nm  
SD: 74.0 nm  
D10: 101.7 nm  
D50: 153.9 nm  
D90: 265.9 nm  
  
Stats: Mean +/- Standard Error  
Mean: 175.7 +/- 1.1 nm  
Mode: 116.7 +/- 12.0 nm  
SD: 74.0 +/- 3.0 nm  
D10: 101.7 +/- 1.4 nm  
D50: 155.3 +/- 4.3 nm  
D90: 268.8 +/- 9.1 nm  
Concentration: 6.65e+008 +/- 1.54e+007 particles/ml  
33.7 +/- 0.8 particles/frame  
37.6 +/- 1.0 centres/frame

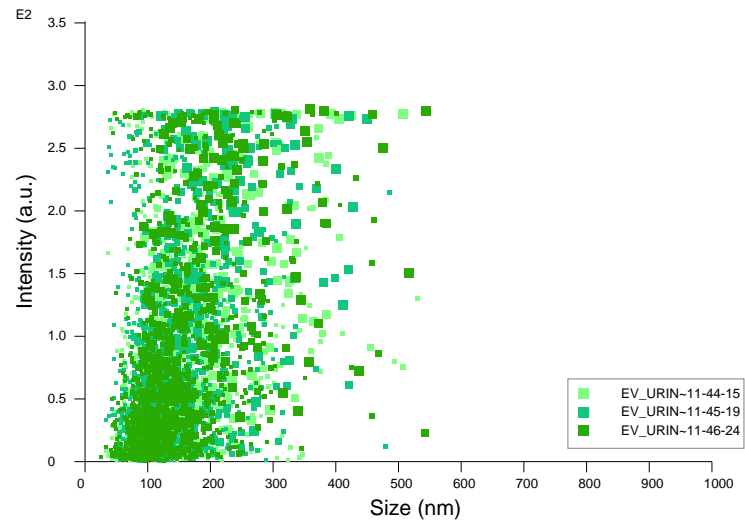

Intensity / Size graph for Experiment:  
EV\_URINE\_ULTRA\_PZ3 2021-09-03 11-44-07

**Script Used: (Full Text):**

SOP Standard Measurement 11-44-07AM 03Sep2021.txt
