# Supplementary material for: Salting-Out Approach Is Worthy of Comparison with Ultracentrifugation for Extracellular Vesicle Isolation from Tumor and Healthy Models
Source: MDPI journal article supplement (doi:10.3390/biom11121857), 2021-12-10
Supplement: s1 [file s1]

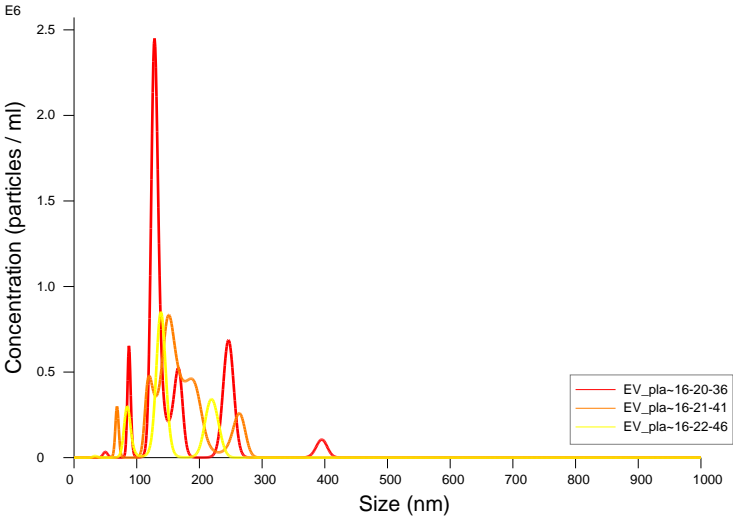

FTLA Concentration / Size graph for Experiment:  
EV\_plasma\_S-O\_pz2 2021-09-02 16-20-28

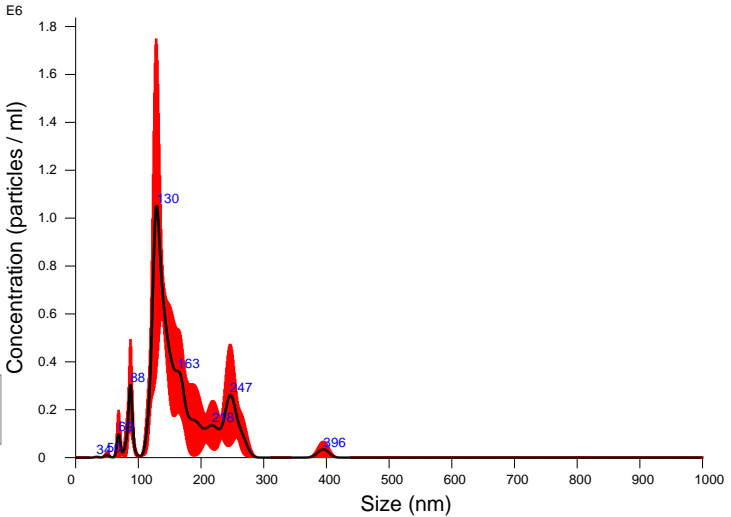

Averaged FTLA Concentration / Size for Experiment:  
EV\_plasma\_S-O\_pz2 2021-09-02 16-20-28  
Error bars indicate + / - 1 standard error of the mean

**Included Files**

EV\_plasma\_S-O\_pz2 2021-09-02 16-20-36  
EV\_plasma\_S-O\_pz2 2021-09-02 16-21-41  
EV\_plasma\_S-O\_pz2 2021-09-02 16-22-46

**Details**

NTA Version: NTA 3.2 Dev Build 3.2.16  
Script Used: SOP Standard Measurement 04-20-28PM 02~  
Time Captured: 16:20:28 02/09/2021  
Operator: simo  
Pre-treatment:  
Sample Name: EV\_plasma\_S-O\_pz2  
Diluent:  
Remarks: 1:1000

**Capture Settings**

Camera Type: sCMOS  
Laser Type: Green  
Camera Level: 14  
Slider Shutter: 1259  
Slider Gain: 366  
FPS: 25.0  
Number of Frames: 1498  
Temperature: 26.3 °C  
Viscosity: (Water) 0.861 - 0.863 cP  
Dilution factor: Dilution not recorded  
Syringe Pump Speed: 50

**Analysis Settings**

Detect Threshold: 5  
Blur Size: Auto  
Max Jump Distance: Auto: 14.0 - 16.9 pix

**Results**

Stats: Merged Data

Mean: 164.8 nm  
Mode: 129.1 nm  
SD: 55.6 nm  
D10: 118.2 nm  
D50: 146.2 nm  
D90: 245.4 nm

Stats: Mean +/- Standard Error

Mean: 163.3 +/- 3.7 nm  
Mode: 139.3 +/- 6.6 nm  
SD: 52.6 +/- 6.5 nm  
D10: 108.8 +/- 10.6 nm  
D50: 144.7 +/- 7.5 nm  
D90: 240.5 +/- 8.5 nm  
Concentration: 5.24e+007 +/- 1.18e+007 particles/ml  
2.7 +/- 0.6 particles/frame  
3.3 +/- 0.8 centres/frame

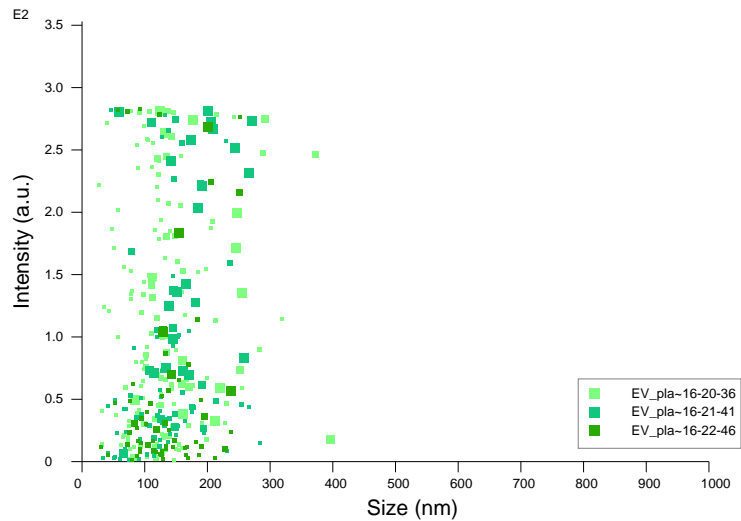

Intensity / Size graph for Experiment:  
EV\_plasma\_S-O\_pz2 2021-09-02 16-20-28

**Script Used: (Full Text):**

SOP Standard Measurement 04-20-28PM 02Sep2021.txt
