# Supplementary material for: Salting-Out Approach Is Worthy of Comparison with Ultracentrifugation for Extracellular Vesicle Isolation from Tumor and Healthy Models
Source: MDPI journal article supplement (doi:10.3390/biom11121857), 2021-12-10
Supplement: s1 [file s1]

**Table S1. EVs isolation characteristics**

| Samples                   | Supports<br>for Cell<br>Cultures | Cells<br>(10 <sup>6</sup> ) | EV<br>Isolation<br>Volume | EVs Isolated<br>by UC<br>(100 µl) | UC<br>EVs Yield<br>(µg)       | EVs Isolated<br>by S-O<br>(in 100 µl) | S-O<br>EVs Yields<br>(µg)     |
|---------------------------|----------------------------------|-----------------------------|---------------------------|-----------------------------------|-------------------------------|---------------------------------------|-------------------------------|
| Saliva_UC (1)             |                                  |                             | 2ml                       | $(6.7 \pm 0.3) \times 10^{10}$    | $(8.3 \pm 2.1) \times 10^2$   | $(2.9 \pm 0.4) \times 10^{10}$        | $(3.6 \pm 1.9) \times 10^2$   |
| Saliva_UC (2)             |                                  |                             |                           | $(9.80 \pm 0.9) \times 10^9$      | $(1.17 \pm 0.3) \times 10^2$  | $(4.10 \pm 0.2) \times 10^9$          | $(0.56 \pm 0.1) \times 10^2$  |
| Saliva_UC (3)             |                                  |                             |                           | $(3.74 \pm 0.2) \times 10^{10}$   | $(4.35 \pm 0.2) \times 10^2$  | $(2.13 \pm 0.2) \times 10^{10}$       | $(2.35 \pm 0.5) \times 10^2$  |
|                           |                                  |                             |                           |                                   |                               |                                       |                               |
| Plasma_UC (1)             |                                  |                             | 4ml                       | $(1.7 \pm 0.1) \times 10^{11}$    | $(16.5 \pm 4.6) \times 10^2$  | $(2.3 \pm 0.3) \times 10^{10}$        | $(2.8 \pm 1.7) \times 10^2$   |
| Plasma_UC (2)             |                                  |                             |                           | $(2.71 \pm 0.2) \times 10^{10}$   | $(3.3 \pm 0.01) \times 10^2$  | $(5.24 \pm 1.1) \times 10^{10}$       | $(6.7 \pm 0.01) \times 10^2$  |
| Plasma_UC (3)             |                                  |                             |                           | $(1.93 \pm 0.1) \times 10^{10}$   | $(2.9 \pm 0.01) \times 10^2$  | $(2.82 \pm 0.3) \times 10^{10}$       | $(3.5 \pm 0.01) \times 10^2$  |
|                           |                                  |                             |                           |                                   |                               |                                       |                               |
| Urine_UC (1)              |                                  |                             | 50ml                      | $(2.2 \pm 0.1) \times 10^{11}$    | $(28.7 \pm 35.8) \times 10^2$ | $(3.5 \pm 0.1) \times 10^{10}$        | $(4.1 \pm 1.6) \times 10^2$   |
| Urine_UC (2)              |                                  |                             |                           | $(6.65 \pm 0.1) \times 10^{10}$   | $(7.4 \pm 0.1) \times 10^2$   | $(6.49 \pm 0.6) \times 10^9$          | $(0.95 \pm 0.02) \times 10^2$ |
| Urine_UC (3)              |                                  |                             |                           | $(2.59 \pm 0.2) \times 10^{10}$   | $(3 \pm 0.08) \times 10^2$    | $(2.13 \pm 0.2) \times 10^{10}$       | $(2.5 \pm 0.05) \times 10^2$  |
|                           |                                  |                             |                           |                                   |                               |                                       |                               |
| Human<br>cancer cells     | flasks<br>75cm <sup>2</sup>      | 24± 0.7                     | 30ml                      | $(4.2 \pm 0.6) \times 10^{10}$    | $(3.3 \pm 0.8) \times 10^2$   | $(2.5 \pm 0.3) \times 10^{10}$        | $(2.5 \pm 0.6) \times 10^2$   |
|                           |                                  |                             |                           |                                   |                               |                                       |                               |
| Human non<br>cancer cells | flasks<br>75 cm <sup>2</sup>     | 22± 0.3                     | 30ml                      | $(6.8 \pm 0.4) \times 10^{10}$    | $(3.1 \pm 0.4) \times 10^2$   | $(3.3 \pm 0.1) \times 10^{10}$        | $(2.6 \pm 0.5) \times 10^2$   |
|                           |                                  |                             |                           |                                   |                               |                                       |                               |
| Insect cells              | flasks<br>75 cm <sup>2</sup>     | 61± 1                       | 30ml                      | $(6.3 \pm 0.3) \times 10^{10}$    | $(2.8 \pm 0.4) \times 10^2$   | $(2.1 \pm 0.2) \times 10^{10}$        | $(1.3 \pm 0.2) \times 10^2$   |
|                           |                                  |                             |                           |                                   |                               |                                       |                               |
| Unicellular<br>organisms  | flasks<br>75 cm <sup>2</sup>     | 0,6±0,1<br>(OD)             | 50ml                      | $(3.3 \pm 0.1) \times 10^{10}$    | $(6.2 \pm 0.7) \times 10^2$   | $(2.9 \pm 1.5) \times 10^{10}$        | $(2.9 \pm 0.5) \times 10^2$   |
