# Supplementary material for: Salting-Out Approach Is Worthy of Comparison with Ultracentrifugation for Extracellular Vesicle Isolation from Tumor and Healthy Models
Source: MDPI journal article supplement (doi:10.3390/biom11121857), 2021-12-10
Supplement: s1 [file s1]

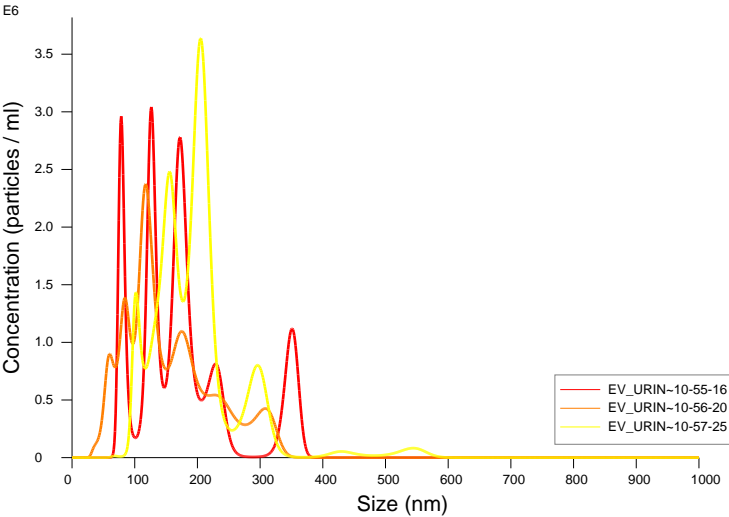

FTLA Concentration / Size graph for Experiment:  
EV\_URINE\_ULTRA\_PZ2 2021-09-03 10-55-05

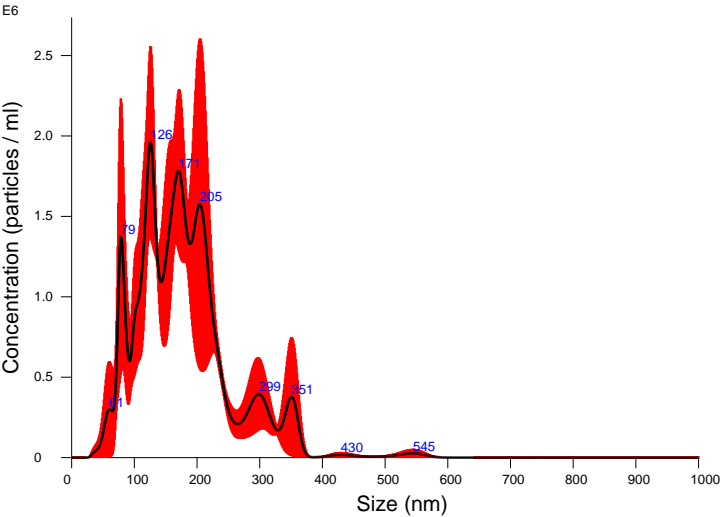

Averaged FTLA Concentration / Size for Experiment:  
EV\_URINE\_ULTRA\_PZ2 2021-09-03 10-55-05  
Error bars indicate + / - 1 standard error of the mean

**Included Files**

EV\_URINE\_ULTRA\_PZ2 2021-09-03 10-55-16  
EV\_URINE\_ULTRA\_PZ2 2021-09-03 10-56-20  
EV\_URINE\_ULTRA\_PZ2 2021-09-03 10-57-25

**Details**

NTA Version: NTA 3.2 Dev Build 3.2.16  
Script Used: SOP Standard Measurement 10-55-05AM 03~  
Time Captured: 10:55:05 03/09/2021  
Operator: simo  
Pre-treatment:  
Sample Name: EV\_URINE\_ULTRA\_PZ2  
Diluent:  
Remarks: 1:1000

**Capture Settings**

Camera Type: sCMOS  
Laser Type: Green  
Camera Level: 13  
Slider Shutter: 1232  
Slider Gain: 219  
FPS: 25.0  
Number of Frames: 1498  
Temperature: 23.0 °C  
Viscosity: (Water) 0.930 - 0.931 cP  
Dilution factor: Dilution not recorded  
Syringe Pump Speed: 50

**Analysis Settings**

Detect Threshold: 5  
Blur Size: Auto  
Max Jump Distance: Auto: 10.9 - 14.6 pix

**Results**

Stats: Merged Data

Mean: 177.9 nm  
Mode: 125.7 nm  
SD: 76.2 nm  
D10: 88.1 nm  
D50: 168.0 nm  
D90: 286.9 nm

Stats: Mean +/- Standard Error

Mean: 176.0 +/- 12.2 nm  
Mode: 149.7 +/- 27.8 nm  
SD: 74.2 +/- 2.6 nm  
D10: 91.5 +/- 14.7 nm  
D50: 163.4 +/- 16.8 nm  
D90: 296.9 +/- 22.1 nm  
Concentration: 2.59e+008 +/- 2.20e+007 particles/ml  
13.1 +/- 1.1 particles/frame  
17.1 +/- 1.6 centres/frame

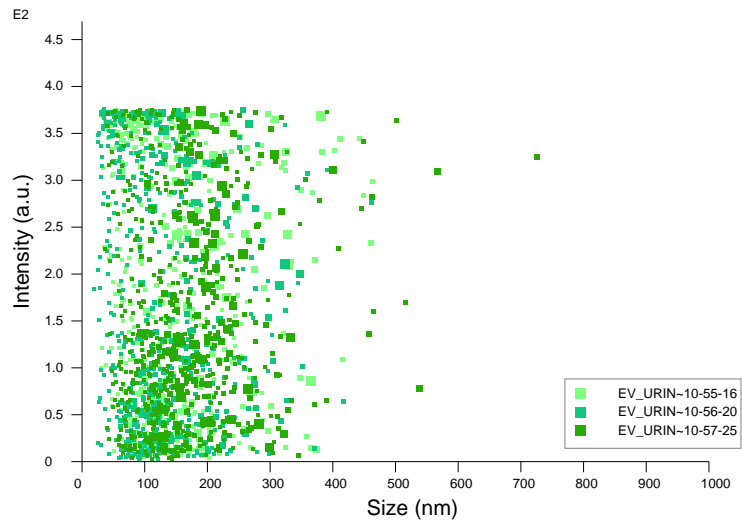

Intensity / Size graph for Experiment:  
EV\_URINE\_ULTRA\_PZ2 2021-09-03 10-55-05

**Script Used: (Full Text):**

SOP Standard Measurement 10-55-05AM 03Sep2021.txt
