# Supplementary material for: Salting-Out Approach Is Worthy of Comparison with Ultracentrifugation for Extracellular Vesicle Isolation from Tumor and Healthy Models
Source: MDPI journal article supplement (doi:10.3390/biom11121857), 2021-12-10
Supplement: s1 [file s1]

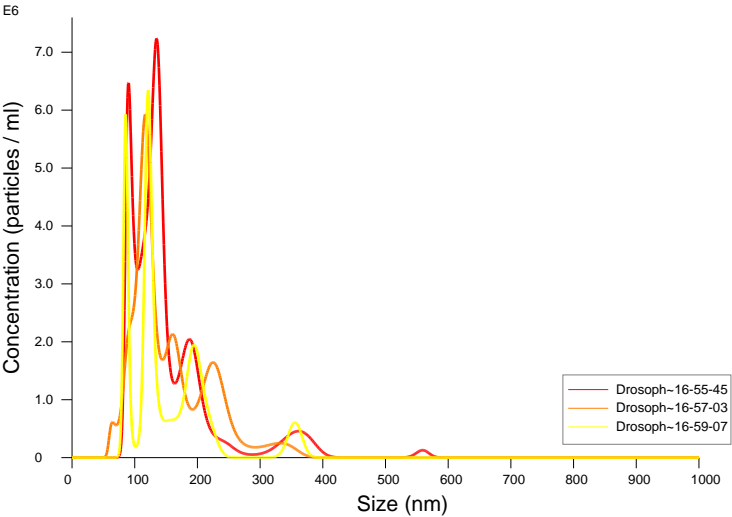

FTLA Concentration / Size graph for Experiment:  
Drosophila\_U 2019-11-15 16-55-00

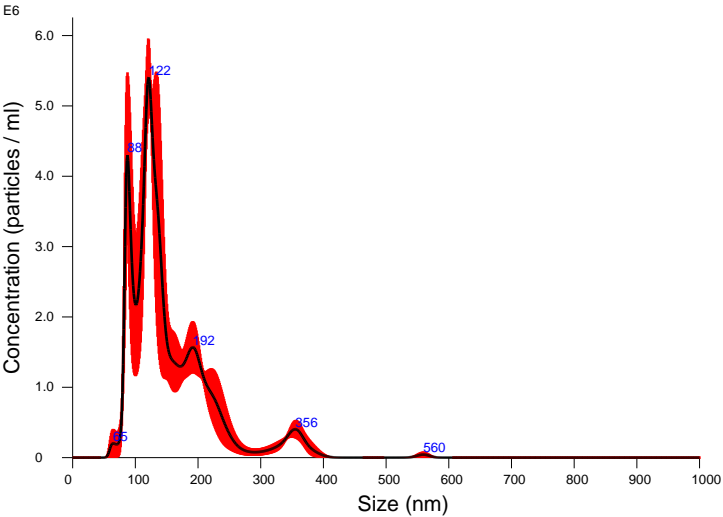

Averaged FTLA Concentration / Size for Experiment:  
Drosophila\_U 2019-11-15 16-55-00  
Error bars indicate + / - 1 standard error of the mean

Included Files

Drosophila\_U 2019-11-15 16-55-45  
Drosophila\_U 2019-11-15 16-57-03  
Drosophila\_U 2019-11-15 16-59-07

Details

NTA Version: NTA 3.2 Dev Build 3.2.16  
Script Used: SOP Standard Measurement 04-55-00PM 15~  
Time Captured: 16:55:00 15/11/2019  
Operator: Antonio  
Pre-treatment:  
Sample Name: Drosophila\_U  
Diluent:  
Remarks:

Capture Settings

Camera Type: sCMOS  
Laser Type: Green  
Camera Level: 14  
Slider Shutter: 1259  
Slider Gain: 366  
FPS: 25.0  
Number of Frames: 1498  
Temperature: 25.0 - 25.0 °C  
Viscosity: (Water) 0.9 cP  
Dilution factor: Dilution not recorded

Analysis Settings

Detect Threshold: 5  
Blur Size: Auto  
Max Jump Distance: Auto: 12.1 - 12.7 pix

Results

Stats: Merged Data

Mean: 153.7 nm  
Mode: 121.2 nm  
SD: 67.9 nm  
D10: 88.9 nm  
D50: 131.1 nm  
D90: 229.6 nm

Stats: Mean +/- Standard Error

Mean: 153.7 +/- 0.8 nm  
Mode: 124.4 +/- 5.4 nm  
SD: 67.4 +/- 3.3 nm  
D10: 89.5 +/- 2.5 nm  
D50: 130.3 +/- 1.9 nm  
D90: 224.0 +/- 7.3 nm  
Concentration: 3.83e+008 +/- 5.95e+007 particles/ml  
19.4 +/- 3.0 particles/frame  
20.8 +/- 3.1 centres/frame

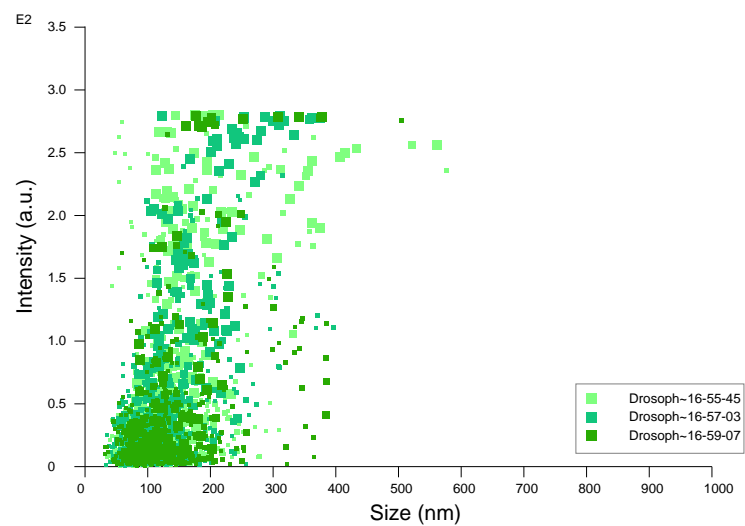

Intensity / Size graph for Experiment:  
Drosophila\_U 2019-11-15 16-55-00

**Script Used: (Full Text):**

SOP Standard Measurement 04-55-00PM 15Nov2019.txt
