# Supplementary material for: Salting-Out Approach Is Worthy of Comparison with Ultracentrifugation for Extracellular Vesicle Isolation from Tumor and Healthy Models
Source: MDPI journal article supplement (doi:10.3390/biom11121857), 2021-12-10
Supplement: s1 [file s1]

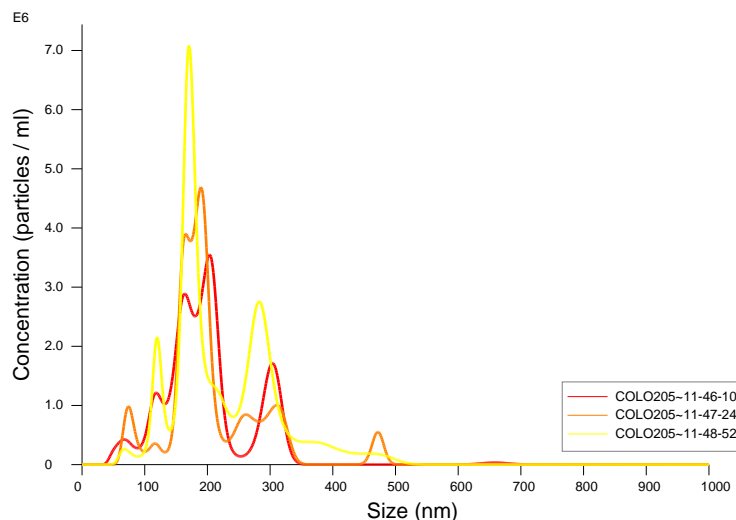

FTLA Concentration / Size graph for Experiment:  
COLO205\_u 2019-11-21 11-46-02

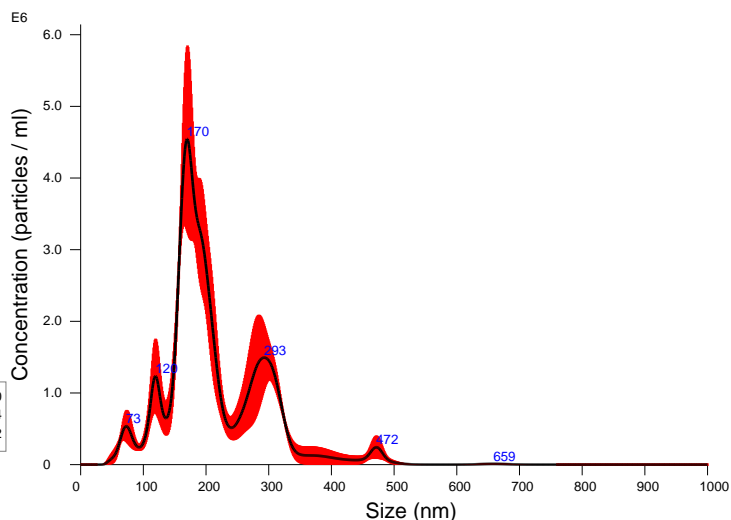

Averaged FTLA Concentration / Size for Experiment:  
COLO205\_u 2019-11-21 11-46-02  
Error bars indicate + / - 1 standard error of the mean

### Included Files

COLO205\_u 2019-11-21 11-46-10  
COLO205\_u 2019-11-21 11-47-24  
COLO205\_u 2019-11-21 11-48-52

### Details

NTA Version: NTA 3.2 Dev Build 3.2.16  
Script Used: SOP Standard Measurement 11-46-02AM 21~  
Time Captured: 11:46:02 21/11/2019  
Operator: Antonio  
Pre-treatment:  
Sample Name: COLO205\_u  
Diluent:  
Remarks:

### Capture Settings

Camera Type: sCMOS  
Laser Type: Green  
Camera Level: 12  
Slider Shutter: 1200  
Slider Gain: 146  
FPS: 25.0  
Number of Frames: 1498  
Temperature: 22.4 - 22.6 °C  
Viscosity: (Water) 0.941 - 0.943 cP  
Dilution factor: Dilution not recorded

### Analysis Settings

Detect Threshold: 7  
Blur Size: Auto  
Max Jump Distance: Auto: 11.5 - 13.5 pix

### Results

Stats: Merged Data

Mean: 210.6 nm  
Mode: 169.9 nm  
SD: 79.1 nm  
D10: 126.1 nm  
D50: 188.6 nm  
D90: 308.3 nm

Stats: Mean +/- Standard Error

Mean: 209.0 +/- 7.6 nm  
Mode: 187.9 +/- 9.5 nm  
SD: 77.6 +/- 3.2 nm  
D10: 130.4 +/- 7.3 nm  
D50: 189.1 +/- 1.3 nm  
D90: 310.9 +/- 7.2 nm  
Concentration: 4.03e+008 +/- 4.42e+007 particles/ml  
20.5 +/- 2.2 particles/frame  
27.8 +/- 1.8 centres/frame

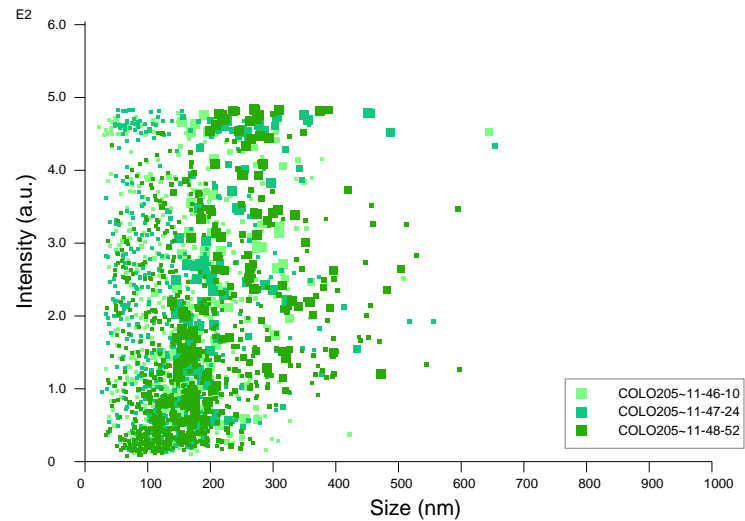

Intensity / Size graph for Experiment:  
COLO205\_u 2019-11-21 11-46-02

**Script Used: (Full Text):**

SOP Standard Measurement 11-46-02AM 21Nov2019.txt
