# Supplementary material for: Salting-Out Approach Is Worthy of Comparison with Ultracentrifugation for Extracellular Vesicle Isolation from Tumor and Healthy Models
Source: MDPI journal article supplement (doi:10.3390/biom11121857), 2021-12-10
Supplement: s1 [file s1]

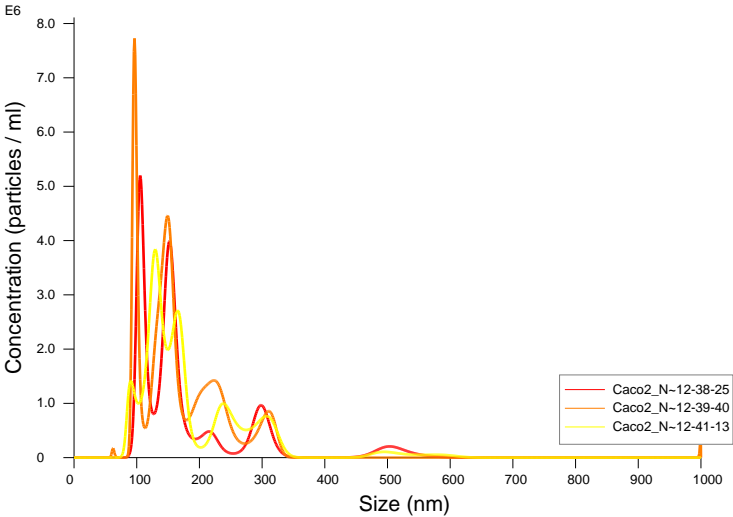

FTLA Concentration / Size graph for Experiment:  
Caco2\_NaAc 2019-11-19 12-38-11

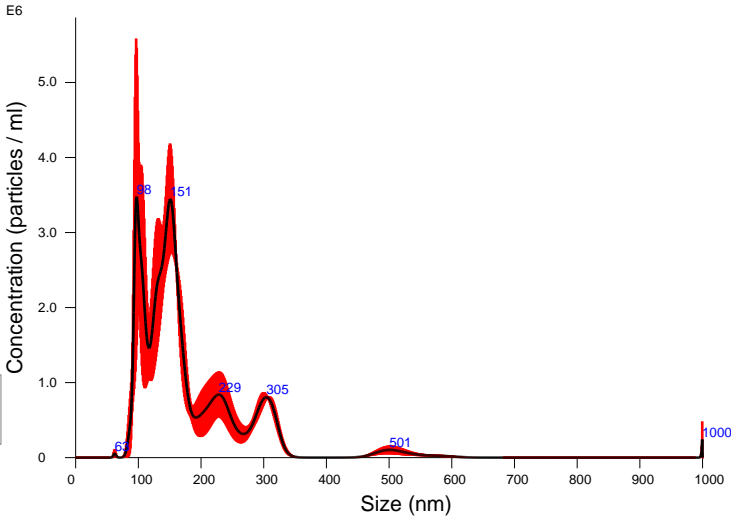

Averaged FTLA Concentration / Size for Experiment:  
Caco2\_NaAc 2019-11-19 12-38-11  
Error bars indicate + / - 1 standard error of the mean

|                                                                                                                                                                                                                                                                                                                                                                                                                                                                                                                                                                                                                                                                                                                                                                                                                                                                                                                                                                                                         |                                                                                                                                                                                                                                                                                                                                                                                                                                                                                                                                                                                                                                        |
|---------------------------------------------------------------------------------------------------------------------------------------------------------------------------------------------------------------------------------------------------------------------------------------------------------------------------------------------------------------------------------------------------------------------------------------------------------------------------------------------------------------------------------------------------------------------------------------------------------------------------------------------------------------------------------------------------------------------------------------------------------------------------------------------------------------------------------------------------------------------------------------------------------------------------------------------------------------------------------------------------------|----------------------------------------------------------------------------------------------------------------------------------------------------------------------------------------------------------------------------------------------------------------------------------------------------------------------------------------------------------------------------------------------------------------------------------------------------------------------------------------------------------------------------------------------------------------------------------------------------------------------------------------|
| <div><div>Included Files</div><div>Caco2_NaAc 2019-11-19 12-38-25<br/>Caco2_NaAc 2019-11-19 12-39-40<br/>Caco2_NaAc 2019-11-19 12-41-13</div><div><div>Details</div><div><div>NTA Version:NTA 3.2 Dev Build 3.2.16</div><div>Script Used:SOP Standard Measurement 12-38-11PM 19~</div><div>Time Captured:12:38:11 19/11/2019</div><div>Operator:Antonio</div><div>Pre-treatment:</div><div>Sample Name:Caco2_NaAc</div><div>Diluent:</div><div>Remarks:</div></div><div><div>Capture Settings</div><div><div>Camera Type:sCMOS</div><div>Laser Type:Green</div><div>Camera Level:14</div><div>Slider Shutter:1259</div><div>Slider Gain:366</div><div>FPS:25.0</div><div>Number of Frames:1498</div><div>Temperature:23.0 °C</div><div>Viscosity:(Water) 0.9 cP</div><div>Dilution factor:Dilution not recorded</div></div><div><div>Analysis Settings</div><div><div>Detect Threshold:5</div><div>Blur Size:Auto</div><div>Max Jump Distance:Auto: 11.2 - 11.9 pix</div></div></div></div></div></div> | <div><div>Results</div><div><div>Stats: Merged Data</div><div><div>Mean:178.6 nm</div><div>Mode:97.3 nm</div><div>SD:88.8 nm</div><div>D10:99.1 nm</div><div>D50:151.1 nm</div><div>D90:295.0 nm</div></div><div><div>Stats: Mean +/- Standard Error</div><div><div>Mean:179.0 +/- 4.7 nm</div><div>Mode:110.5 +/- 9.9 nm</div><div>SD:89.0 +/- 6.0 nm</div><div>D10:102.0 +/- 3.5 nm</div><div>D50:151.9 +/- 2.1 nm</div><div>D90:288.7 +/- 12.4 nm</div><div>Concentration:<div>3.10e+008 +/- 2.28e+007 particles/ml</div><div>15.7 +/- 1.2 particles/frame</div><div>18.9 +/- 1.5 centres/frame</div></div></div></div></div></div> |
|---------------------------------------------------------------------------------------------------------------------------------------------------------------------------------------------------------------------------------------------------------------------------------------------------------------------------------------------------------------------------------------------------------------------------------------------------------------------------------------------------------------------------------------------------------------------------------------------------------------------------------------------------------------------------------------------------------------------------------------------------------------------------------------------------------------------------------------------------------------------------------------------------------------------------------------------------------------------------------------------------------|----------------------------------------------------------------------------------------------------------------------------------------------------------------------------------------------------------------------------------------------------------------------------------------------------------------------------------------------------------------------------------------------------------------------------------------------------------------------------------------------------------------------------------------------------------------------------------------------------------------------------------------|

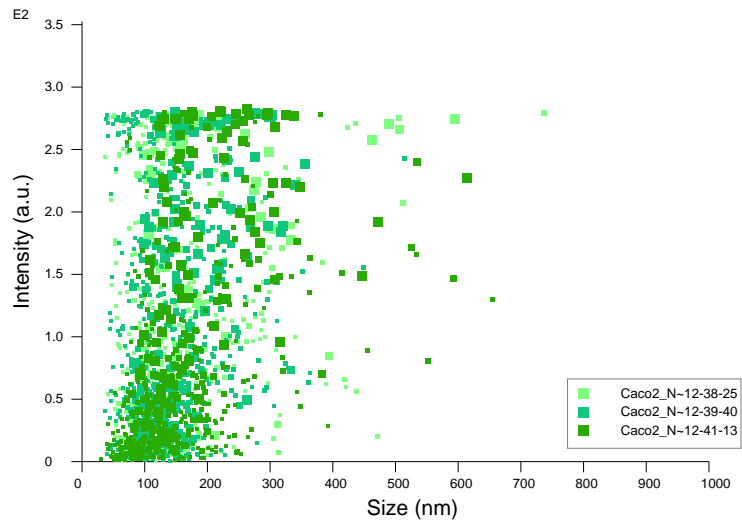

Intensity / Size graph for Experiment:  
Caco2\_NaAc 2019-11-19 12-38-11

**Script Used: (Full Text):**

SOP Standard Measurement 12-38-11PM 19Nov2019.txt
