# Supplementary material for: Salting-Out Approach Is Worthy of Comparison with Ultracentrifugation for Extracellular Vesicle Isolation from Tumor and Healthy Models
Source: MDPI journal article supplement (doi:10.3390/biom11121857), 2021-12-10
Supplement: s1 [file s1]

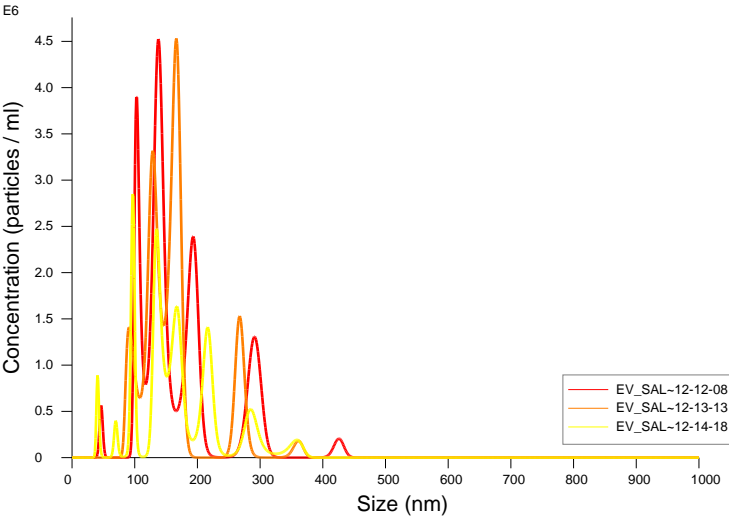

FTLA Concentration / Size graph for Experiment:  
EV\_SALIVA\_S-O\_PZ3 2021-09-03 12-12-00

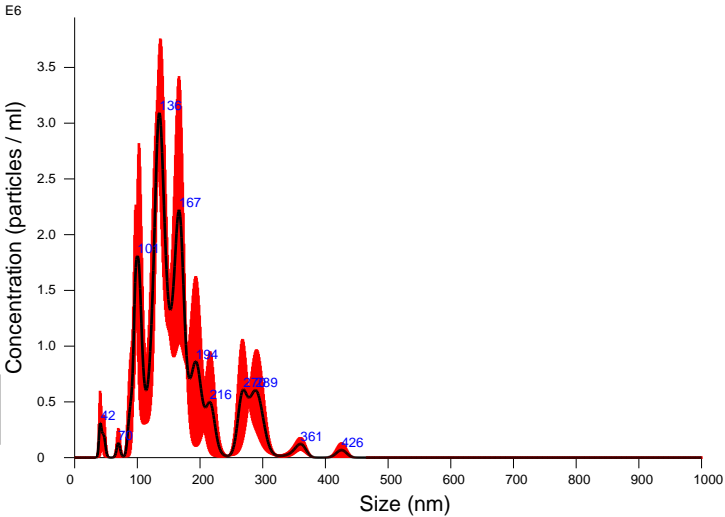

Averaged FTLA Concentration / Size for Experiment:  
EV\_SALIVA\_S-O\_PZ3 2021-09-03 12-12-00  
Error bars indicate + / - 1 standard error of the mean

Included Files

EV\_SALIVA\_S-O\_PZ3 2021-09-03 12-12-08  
EV\_SALIVA\_S-O\_PZ3 2021-09-03 12-13-13  
EV\_SALIVA\_S-O\_PZ3 2021-09-03 12-14-18

Details

NTA Version: NTA 3.2 Dev Build 3.2.16  
Script Used: SOP Standard Measurement 12-12-00PM 03~  
Time Captured: 12:12:00 03/09/2021  
Operator: simo  
Pre-treatment:  
Sample Name: EV\_SALIVA\_S-O\_PZ3  
Diluent:  
Remarks: 1:1000

Capture Settings

Camera Type: sCMOS  
Laser Type: Green  
Camera Level: 14  
Slider Shutter: 1259  
Slider Gain: 366  
FPS: 25.0  
Number of Frames: 1498  
Temperature: 25.0 °C  
Viscosity: (Water) 0.887 - 0.888 cP  
Dilution factor: Dilution not recorded  
Syringe Pump Speed: 50

Analysis Settings

Detect Threshold: 5  
Blur Size: Auto  
Max Jump Distance: Auto: 10.8 - 17.7 pix

Results

Stats: Merged Data

Mean: 167.2 nm  
Mode: 135.1 nm  
SD: 63.8 nm  
D10: 100.5 nm  
D50: 150.6 nm  
D90: 273.7 nm

Stats: Mean +/- Standard Error

Mean: 167.6 +/- 3.3 nm  
Mode: 133.7 +/- 20.1 nm  
SD: 63.6 +/- 4.6 nm  
D10: 100.4 +/- 2.6 nm  
D50: 152.3 +/- 4.6 nm  
D90: 276.8 +/- 7.0 nm  
Concentration: 2.13e+008 +/- 2.78e+007 particles/ml  
10.8 +/- 1.4 particles/frame  
12.9 +/- 1.0 centres/frame

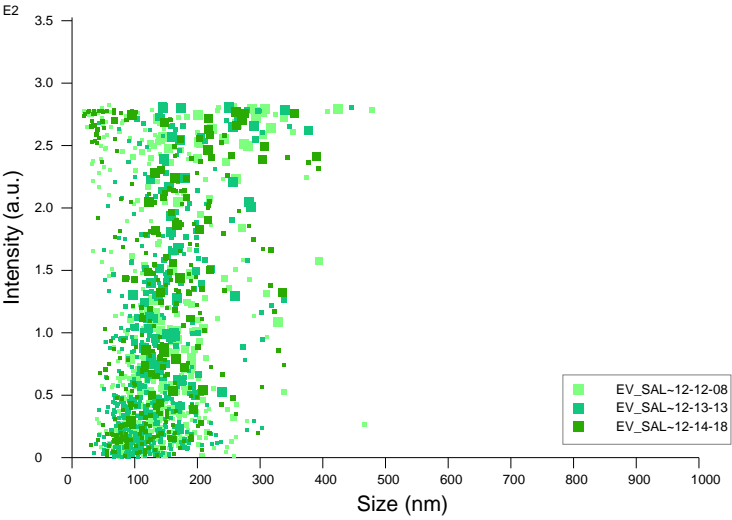

Intensity / Size graph for Experiment:  
EV\_SALIVA\_S-O\_PZ3 2021-09-03 12-12-00

**Script Used: (Full Text):**

SOP Standard Measurement 12-12-00PM 03Sep2021.txt
