# Supplementary material for: Salting-Out Approach Is Worthy of Comparison with Ultracentrifugation for Extracellular Vesicle Isolation from Tumor and Healthy Models
Source: MDPI journal article supplement (doi:10.3390/biom11121857), 2021-12-10

EVs from Yeast (UC)  
Unstained Ctrl

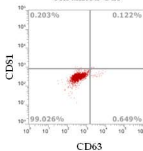

EVs from Yeast (UC)

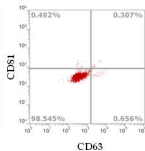

EVs from Yeast (S-O)  
Unstained Ctrl

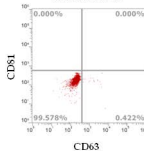

EVs from Yeast (S-O)

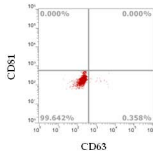

EVs from Bacteria (UC)  
Unstained Ctrl

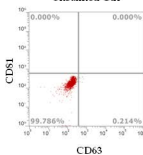

EVs from Bacteria (UC)

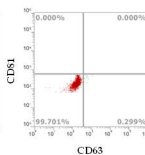

EVs from Bacteria (S-O)  
Unstained Ctrl

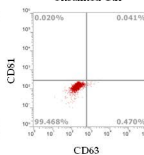

EVs from Bacteria (S-O)

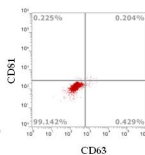

Supplement: s1 [file s1]
