# Supplementary material for: Salting-Out Approach Is Worthy of Comparison with Ultracentrifugation for Extracellular Vesicle Isolation from Tumor and Healthy Models
Source: MDPI journal article supplement (doi:10.3390/biom11121857), 2021-12-10
Supplement: s1 [file s1]

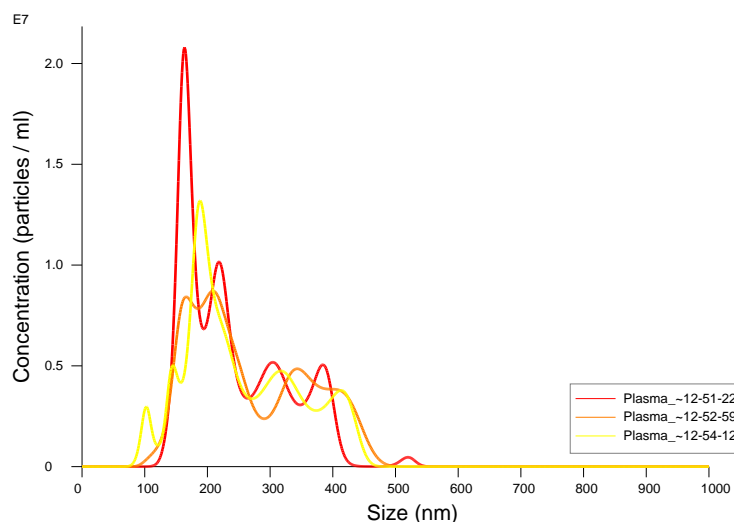

FTLA Concentration / Size graph for Experiment:  
Plasma\_U 2019-11-20 12-51-11

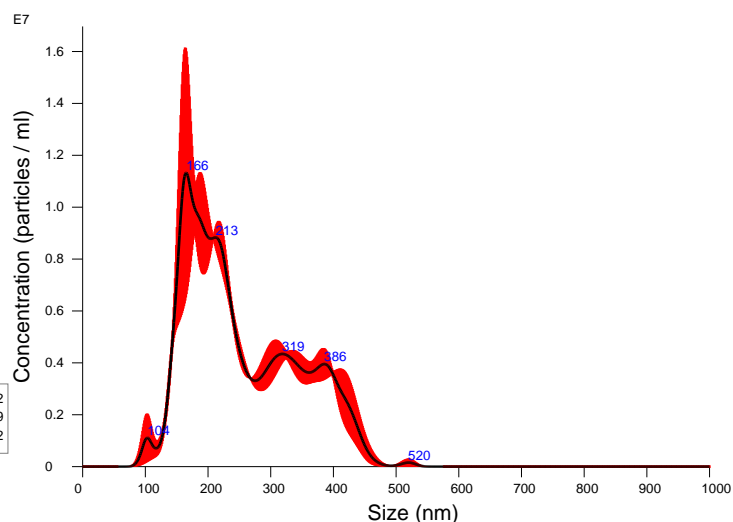

Averaged FTLA Concentration / Size for Experiment:  
Plasma\_U 2019-11-20 12-51-11  
Error bars indicate + / - 1 standard error of the mean

### Included Files

Plasma\_U 2019-11-20 12-51-22  
Plasma\_U 2019-11-20 12-52-59  
Plasma\_U 2019-11-20 12-54-12

### Details

NTA Version: NTA 3.2 Dev Build 3.2.16  
Script Used: SOP Standard Measurement 12-51-11PM 20~  
Time Captured: 12:51:11 20/11/2019  
Operator: Antonio  
Pre-treatment:  
Sample Name: Plasma\_U  
Diluent:  
Remarks:

### Capture Settings

Camera Type: sCMOS  
Laser Type: Green  
Camera Level: 9 - 10  
Slider Shutter: 607 - 696  
Slider Gain: 15 - 73  
FPS: 25.0  
Number of Frames: 1498  
Temperature: 23.0 °C  
Viscosity: (Water) 0.9 cP  
Dilution factor: Dilution not recorded

### Analysis Settings

Detect Threshold: 9  
Blur Size: Auto  
Max Jump Distance: Auto: 9.9 - 11.2 pix

### Results

Stats: Merged Data

Mean: 252.9 nm  
Mode: 165.1 nm  
SD: 88.8 nm  
D10: 155.2 nm  
D50: 226.0 nm  
D90: 388.1 nm

Stats: Mean +/- Standard Error

Mean: 253.4 +/- 7.3 nm  
Mode: 186.9 +/- 13.1 nm  
SD: 88.3 +/- 3.3 nm  
D10: 154.4 +/- 2.2 nm  
D50: 227.4 +/- 6.3 nm  
D90: 389.9 +/- 10.1 nm  
Concentration: 1.69e+009 +/- 5.66e+007 particles/ml  
85.6 +/- 2.9 particles/frame  
109.7 +/- 2.8 centres/frame

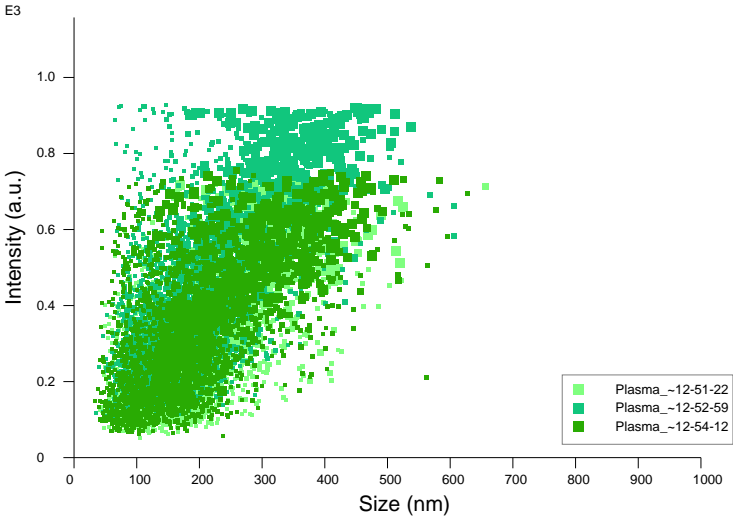

Intensity / Size graph for Experiment:  
Plasma\_U 2019-11-20 12-51-11

**Script Used: (Full Text):**

SOP Standard Measurement 12-51-11PM 20Nov2019.txt
