# Supplementary material for: Salting-Out Approach Is Worthy of Comparison with Ultracentrifugation for Extracellular Vesicle Isolation from Tumor and Healthy Models
Source: MDPI journal article supplement (doi:10.3390/biom11121857), 2021-12-10
Supplement: s1 [file s1]

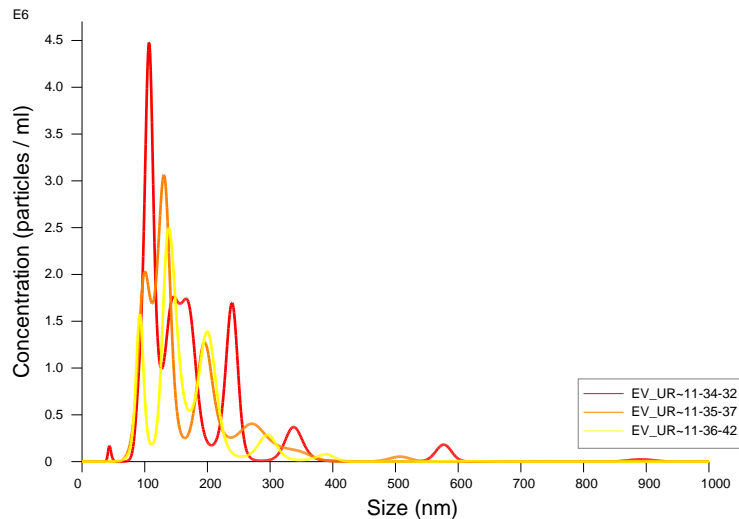

FTLA Concentration / Size graph for Experiment:  
EV\_URINE\_S-O\_PZ3 2021-09-03 11-34-22

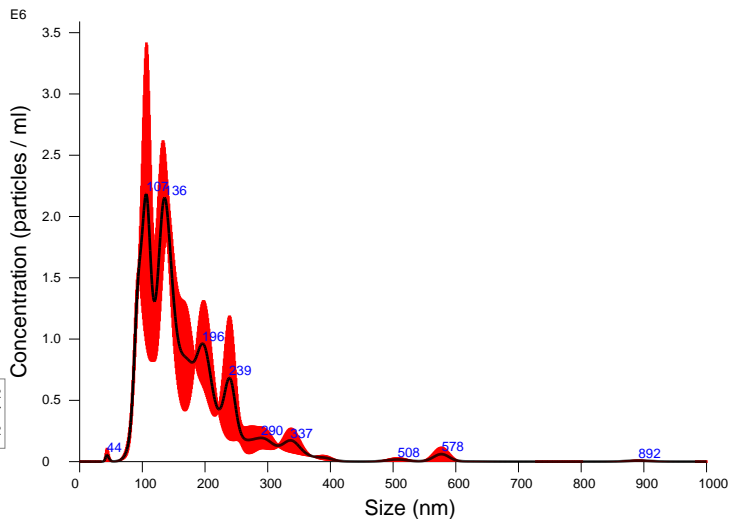

Averaged FTLA Concentration / Size for Experiment:  
EV\_URINE\_S-O\_PZ3 2021-09-03 11-34-22  
Error bars indicate + / - 1 standard error of the mean

## Included Files

EV\_URINE\_S-O\_PZ3 2021-09-03 11-34-32  
EV\_URINE\_S-O\_PZ3 2021-09-03 11-35-37  
EV\_URINE\_S-O\_PZ3 2021-09-03 11-36-42

## Details

NTA Version: NTA 3.2 Dev Build 3.2.16  
Script Used: SOP Standard Measurement 11-34-22AM 03~  
Time Captured: 11:34:22 03/09/2021  
Operator: simo  
Pre-treatment:  
Sample Name: EV\_URINE\_S-O\_PZ3  
Diluent:  
Remarks: 1:1000

## Capture Settings

Camera Type: sCMOS  
Laser Type: Green  
Camera Level: 14  
Slider Shutter: 1259  
Slider Gain: 366  
FPS: 25.0  
Number of Frames: 1498  
Temperature: 23.9 - 24.0 °C  
Viscosity: (Water) 0.909 - 0.911 cP  
Dilution factor: Dilution not recorded  
Syringe Pump Speed: 50

## Analysis Settings

Detect Threshold: 5  
Blur Size: Auto  
Max Jump Distance: Auto: 11.7 - 11.9 pix

## Results

Stats: Merged Data

Mean: 170.2 nm  
Mode: 106.1 nm  
SD: 84.1 nm  
D10: 97.6 nm  
D50: 144.3 nm  
D90: 257.7 nm

Stats: Mean +/- Standard Error

Mean: 169.7 +/- 2.9 nm  
Mode: 125.3 +/- 9.5 nm  
SD: 79.9 +/- 11.1 nm  
D10: 96.8 +/- 1.8 nm  
D50: 144.5 +/- 4.8 nm  
D90: 251.4 +/- 10.9 nm  
Concentration: 2.13e+008 +/- 2.54e+007 particles/ml  
10.8 +/- 1.3 particles/frame  
14.8 +/- 1.1 centres/frame

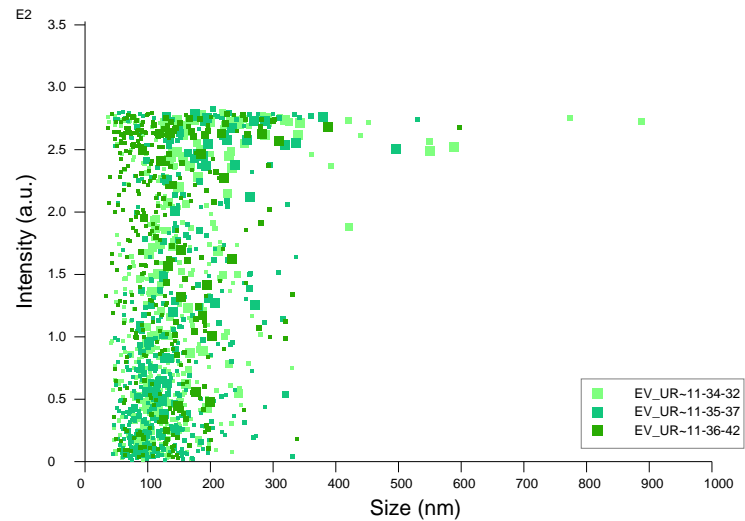

Intensity / Size graph for Experiment:  
EV\_URINE\_S-O\_PZ3 2021-09-03 11-34-22

**Script Used: (Full Text):**

SOP Standard Measurement 11-34-22AM 03Sep2021.txt
