# Supplementary material for: Salting-Out Approach Is Worthy of Comparison with Ultracentrifugation for Extracellular Vesicle Isolation from Tumor and Healthy Models
Source: MDPI journal article supplement (doi:10.3390/biom11121857), 2021-12-10
Supplement: s1 [file s1]

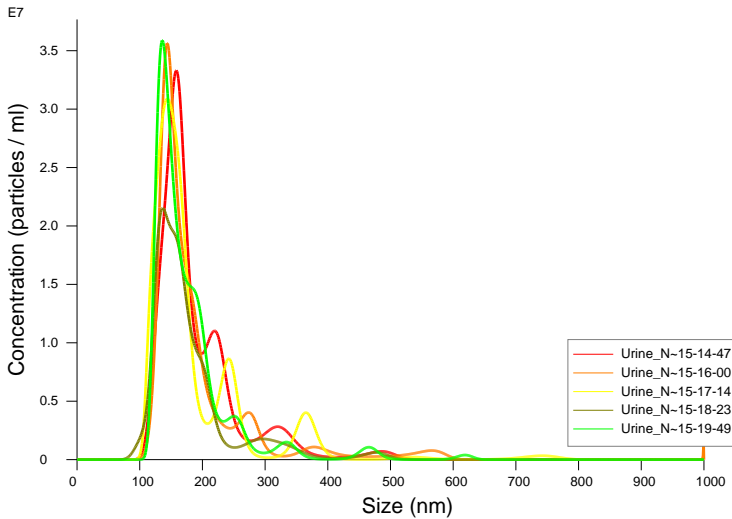

FTLA Concentration / Size graph for Experiment:  
Urine\_NaAC\_Centr 2019-11-19 15-14-26

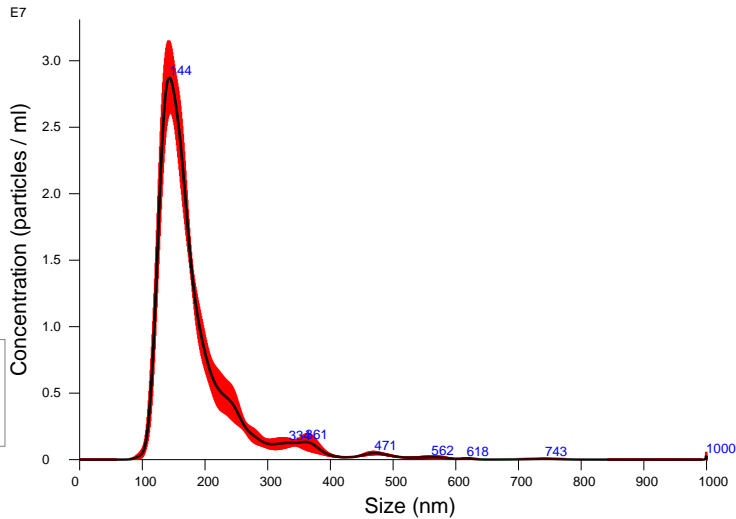

Averaged FTLA Concentration / Size for Experiment:  
Urine\_NaAC\_Centr 2019-11-19 15-14-26  
Error bars indicate + / - 1 standard error of the mean

### Included Files

Urine\_NaAC\_Centr 2019-11-19 15-14-47  
Urine\_NaAC\_Centr 2019-11-19 15-16-00  
Urine\_NaAC\_Centr 2019-11-19 15-17-14  
Urine\_NaAC\_Centr 2019-11-19 15-18-23  
Urine\_NaAC\_Centr 2019-11-19 15-19-49

### Details

NTA Version: NTA 3.2 Dev Build 3.2.16  
Script Used: SOP Standard Measurement 03-14-26PM 19~  
Time Captured: 15:14:26 19/11/2019  
Operator: Antonio  
Pre-treatment:  
Sample Name: Urine\_NaAC\_Centr  
Diluent:  
Remarks:

### Capture Settings

Camera Type: sCMOS  
Laser Type: Green  
Camera Level: 12  
Slider Shutter: 1200  
Slider Gain: 146  
FPS: 25.0  
Number of Frames: 1498  
Temperature: 29.3 - 29.6 °C  
Viscosity: (Water) 0.803 - 0.809 cP  
Dilution factor: Dilution not recorded

### Analysis Settings

Detect Threshold: 8  
Blur Size: Auto  
Max Jump Distance: Auto: 11.2 - 11.8 pix

### Results

Stats: Merged Data

Mean: 185.8 nm  
Mode: 143.1 nm  
SD: 77.9 nm  
D10: 127.6 nm  
D50: 160.5 nm  
D90: 266.5 nm

Stats: Mean +/- Standard Error

Mean: 185.4 +/- 2.8 nm  
Mode: 143.8 +/- 4.0 nm  
SD: 76.7 +/- 5.2 nm  
D10: 127.8 +/- 2.1 nm  
D50: 160.0 +/- 2.0 nm  
D90: 267.6 +/- 6.0 nm  
Concentration: 2.18e+009 +/- 1.16e+008 particles/ml  
110.7 +/- 5.9 particles/frame  
113.6 +/- 5.1 centres/frame

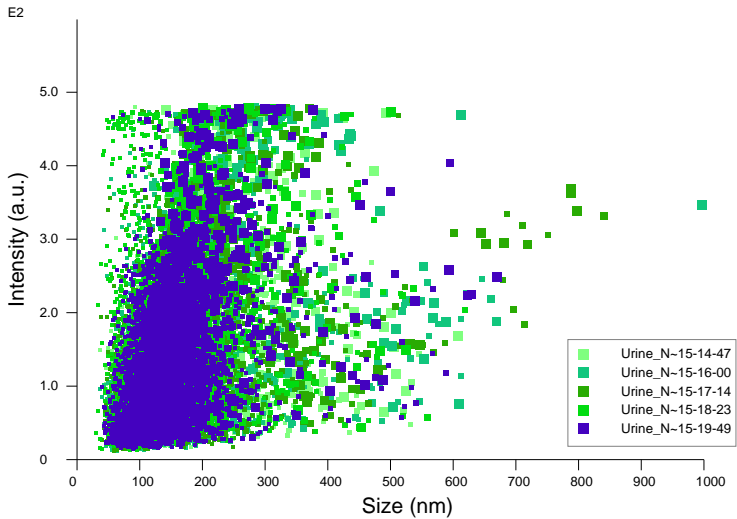

**Script Used: (Full Text):**

SOP Standard Measurement 03-14-26PM 19Nov2019.txt
