# Supplementary material for: Salting-Out Approach Is Worthy of Comparison with Ultracentrifugation for Extracellular Vesicle Isolation from Tumor and Healthy Models
Source: MDPI journal article supplement (doi:10.3390/biom11121857), 2021-12-10
Supplement: s1 [file s1]

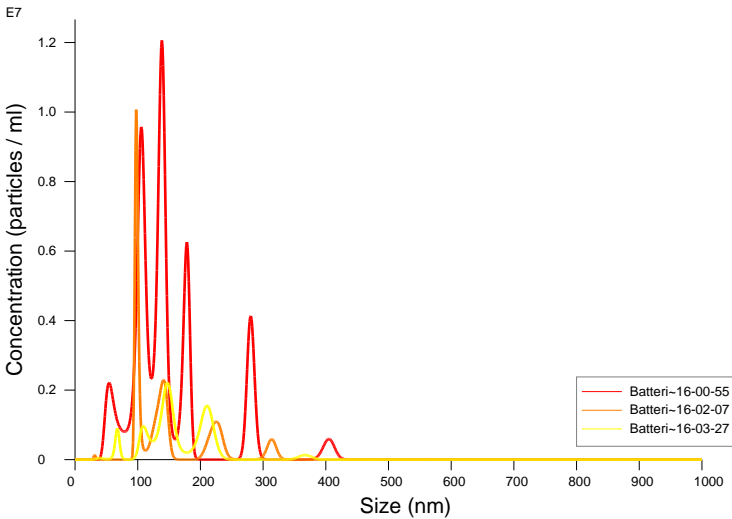

FTLA Concentration / Size graph for Experiment:  
Batteri LE392 NaAc 2020-02-17 16-00-24

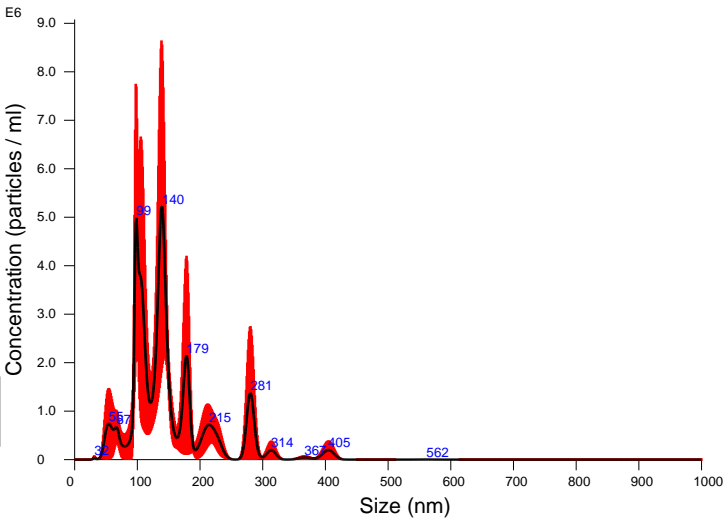

Averaged FTLA Concentration / Size for Experiment:  
Batteri LE392 NaAc 2020-02-17 16-00-24  
Error bars indicate + / - 1 standard error of the mean

**Included Files**

Batteri LE392 NaAc 2020-02-17 16-00-55  
Batteri LE392 NaAc 2020-02-17 16-02-07  
Batteri LE392 NaAc 2020-02-17 16-03-27

**Details**

NTA Version: NTA 3.2 Dev Build 3.2.16  
Script Used: SOP Standard Measurement 04-00-24PM 17~  
Time Captured: 16:00:24 17/02/2020  
Operator: Antonio  
Pre-treatment:  
Sample Name: Batteri LE392 NaAc  
Diluent:  
Remarks:

**Capture Settings**

Camera Type: sCMOS  
Laser Type: Green  
Camera Level: 13  
Slider Shutter: 1232  
Slider Gain: 219  
FPS: 25.0  
Number of Frames: 1498  
Temperature: 22.0 °C  
Viscosity: (Water) 1.0 cP  
Dilution factor: Dilution not recorded

**Analysis Settings**

Detect Threshold: 10  
Blur Size: Auto  
Max Jump Distance: Auto: 12.0 - 15.9 pix

**Results**

Stats: Merged Data

Mean: 150.7 nm  
Mode: 139.0 nm  
SD: 67.0 nm  
D10: 94.3 nm  
D50: 135.8 nm  
D90: 268.9 nm

Stats: Mean +/- Standard Error

Mean: 153.5 +/- 5.0 nm  
Mode: 127.9 +/- 15.3 nm  
SD: 63.4 +/- 4.4 nm  
D10: 96.1 +/- 4.9 nm  
D50: 138.1 +/- 6.7 nm  
D90: 241.8 +/- 17.6 nm  
Concentration: 2.92e+008 +/- 1.47e+008 particles/ml  
14.8 +/- 7.5 particles/frame  
25.1 +/- 15.7 centres/frame

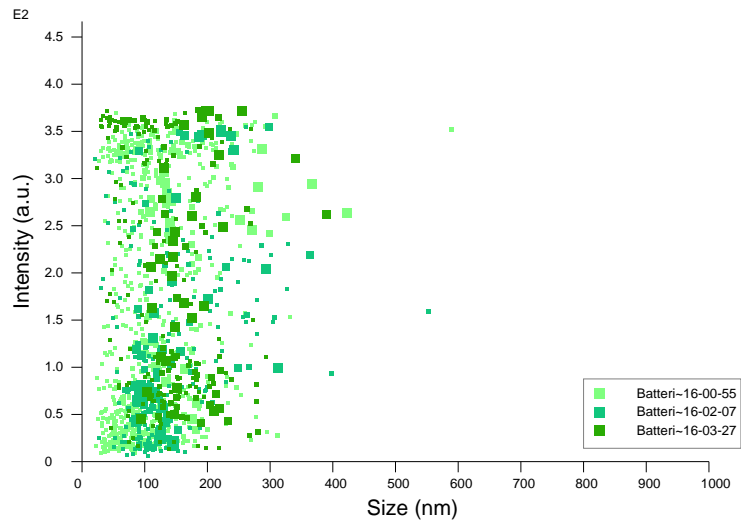

Intensity / Size graph for Experiment:  
Batteri LE392 NaAc 2020-02-17 16-00-24

**Script Used: (Full Text):**

SOP Standard Measurement 04-00-24PM 17Feb2020.txt
