# Supplementary material for: Salting-Out Approach Is Worthy of Comparison with Ultracentrifugation for Extracellular Vesicle Isolation from Tumor and Healthy Models
Source: MDPI journal article supplement (doi:10.3390/biom11121857), 2021-12-10
Supplement: s1 [file s1]

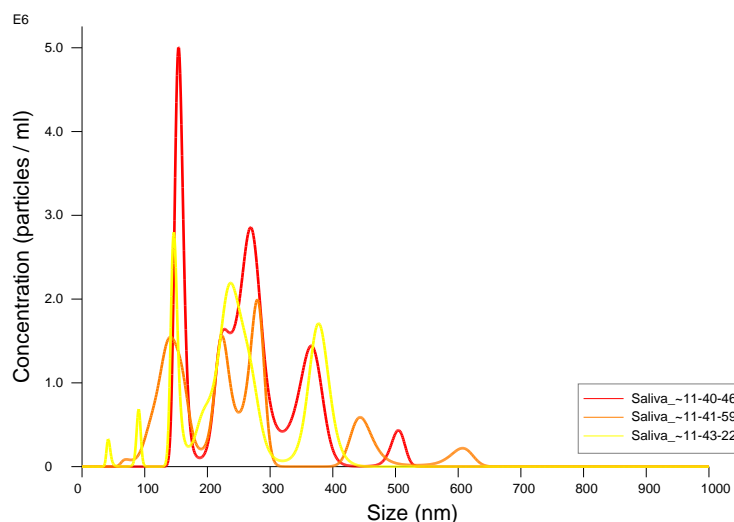

FTLA Concentration / Size graph for Experiment:  
Saliva\_NaAc 2019-11-20 11-39-26

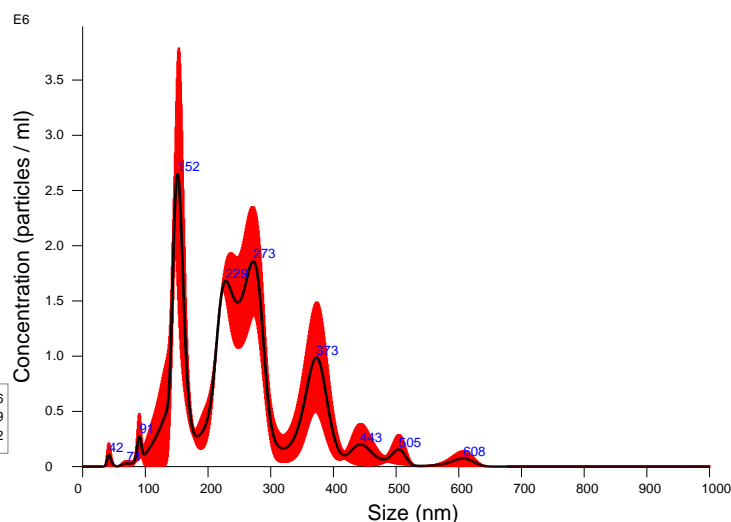

Averaged FTLA Concentration / Size for Experiment:  
Saliva\_NaAc 2019-11-20 11-39-26  
Error bars indicate + / - 1 standard error of the mean

### Included Files

Saliva\_NaAc 2019-11-20 11-40-46  
Saliva\_NaAc 2019-11-20 11-41-59  
Saliva\_NaAc 2019-11-20 11-43-22

### Details

NTA Version: NTA 3.2 Dev Build 3.2.16  
Script Used: SOP Standard Measurement 11-39-26AM 20~  
Time Captured: 11:39:26 20/11/2019  
Operator: Antonio  
Pre-treatment:  
Sample Name: Saliva\_NaAc  
Diluent:  
Remarks:

### Capture Settings

Camera Type: sCMOS  
Laser Type: Green  
Camera Level: 11  
Slider Shutter: 890  
Slider Gain: 146  
FPS: 25.0  
Number of Frames: 1498  
Temperature: 23.0 °C  
Viscosity: (Water) 0.9 cP  
Dilution factor: Dilution not recorded

### Analysis Settings

Detect Threshold: 5  
Blur Size: Auto  
Max Jump Distance: Auto: 8.5 - 14.0 pix

### Results

Stats: Merged Data

Mean: 256.9 nm  
Mode: 151.5 nm  
SD: 97.6 nm  
D10: 145.6 nm  
D50: 246.9 nm  
D90: 382.4 nm

Stats: Mean +/- Standard Error

Mean: 256.1 +/- 3.9 nm  
Mode: 193.4 +/- 43.2 nm  
SD: 98.1 +/- 12.3 nm  
D10: 141.5 +/- 8.0 nm  
D50: 243.2 +/- 9.0 nm  
D90: 399.9 +/- 23.7 nm  
Concentration: 2.88e+008 +/- 3.48e+007 particles/ml  
14.6 +/- 1.8 particles/frame  
22.8 +/- 2.9 centres/frame

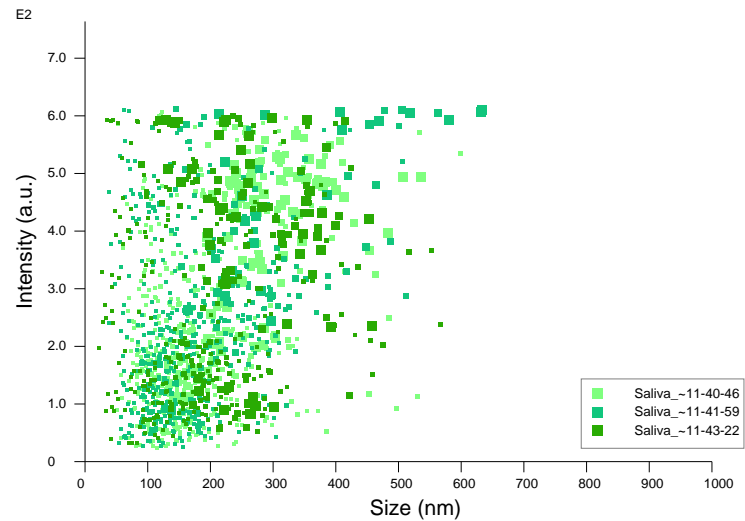

Intensity / Size graph for Experiment:  
Saliva\_NaAc 2019-11-20 11-39-26

**Script Used: (Full Text):**

SOP Standard Measurement 11-39-26AM 20Nov2019.txt
