# Supplementary material for: Salting-Out Approach Is Worthy of Comparison with Ultracentrifugation for Extracellular Vesicle Isolation from Tumor and Healthy Models
Source: MDPI journal article supplement (doi:10.3390/biom11121857), 2021-12-10
Supplement: s1 [file s1]

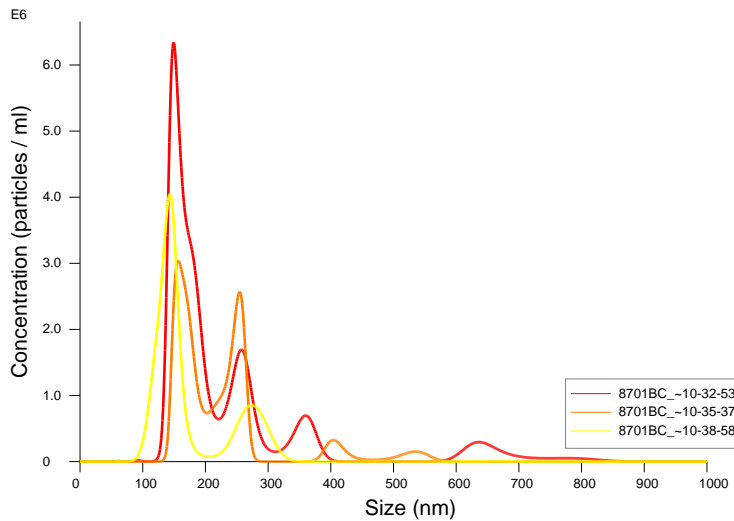

FTLA Concentration / Size graph for Experiment:  
8701BC\_NaAC 2019-10-23 10-32-17

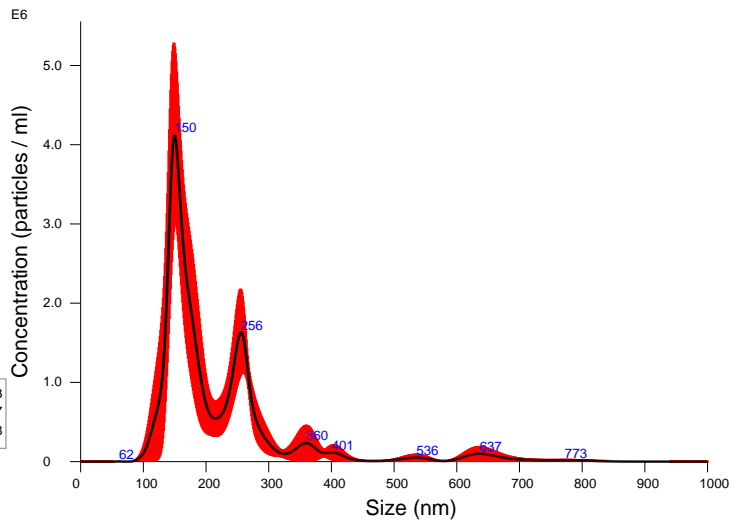

Averaged FTLA Concentration / Size for Experiment:  
8701BC\_NaAC 2019-10-23 10-32-17  
Error bars indicate + / - 1 standard error of the mean

### Included Files

8701BC\_NaAC 2019-10-23 10-32-53  
8701BC\_NaAC 2019-10-23 10-35-37  
8701BC\_NaAC 2019-10-23 10-38-58

### Details

NTA Version: NTA 3.2 Dev Build 3.2.16  
Script Used: SOP Standard Measurement 10-32-17AM 23O~  
Time Captured: 10:32:17 23/10/2019  
Operator: Antonio  
Pre-treatment:  
Sample Name: 8701BC\_NaAC  
Diluent:  
Remarks:

### Capture Settings

Camera Type: sCMOS  
Laser Type: Green  
Camera Level: 12 - 14  
Slider Shutter: 1200 - 1259  
Slider Gain: 146 - 366  
FPS: 25.0  
Number of Frames: 1498  
Temperature: 22.3 - 22.7 °C  
Viscosity: (Water) 0.938 - 0.947 cP  
Dilution factor: Dilution not recorded

### Analysis Settings

Detect Threshold: 14  
Blur Size: Auto  
Max Jump Distance: Auto: 9.0 - 10.4 pix

### Results

Stats: Merged Data

Mean: 216.6 nm  
Mode: 149.9 nm  
SD: 111.4 nm  
D10: 137.6 nm  
D50: 174.5 nm  
D90: 312.6 nm

Stats: Mean +/- Standard Error

Mean: 211.4 +/- 18.3 nm  
Mode: 149.7 +/- 3.8 nm  
SD: 96.0 +/- 20.5 nm  
D10: 138.4 +/- 9.8 nm  
D50: 176.7 +/- 16.7 nm  
D90: 304.2 +/- 28.7 nm  
Concentration: 2.86e+008 +/- 6.05e+007 particles/ml  
14.5 +/- 3.1 particles/frame  
16.5 +/- 3.8 centres/frame

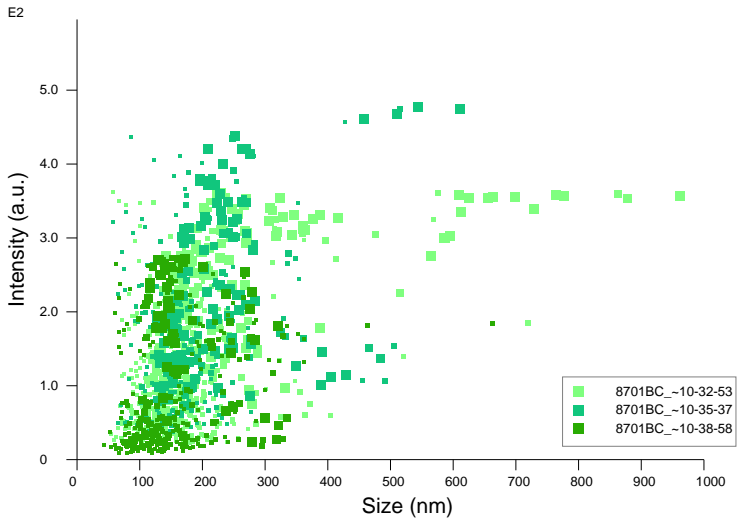

Intensity / Size graph for Experiment:  
8701BC\_NaAC 2019-10-23 10-32-17

**Script Used: (Full Text):**

SOP Standard Measurement 10-32-17AM 23Oct2019.txt
