# Supplementary material for: Salting-Out Approach Is Worthy of Comparison with Ultracentrifugation for Extracellular Vesicle Isolation from Tumor and Healthy Models
Source: MDPI journal article supplement (doi:10.3390/biom11121857), 2021-12-10

EVs from plasma1 (UC)

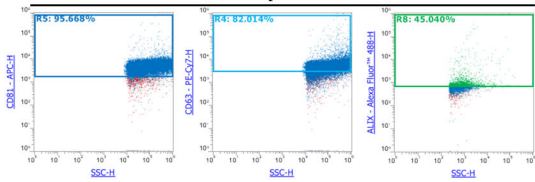

EVs from plasma1 (S-O)

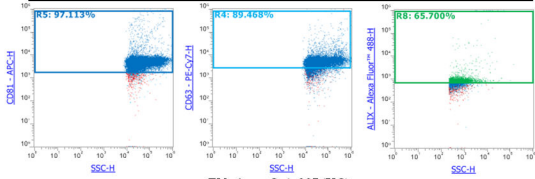

EVs from Colo205 (UC)

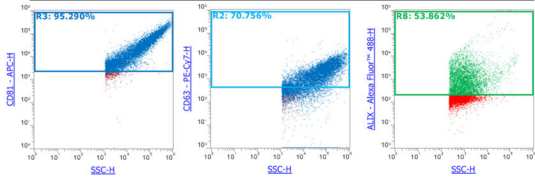

EVs from Colo205 (S-O)

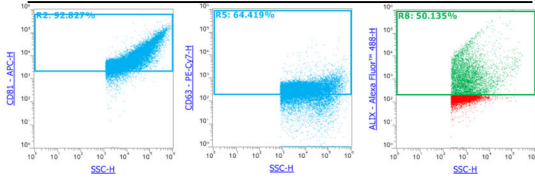

EVs from plasma1 (UC)

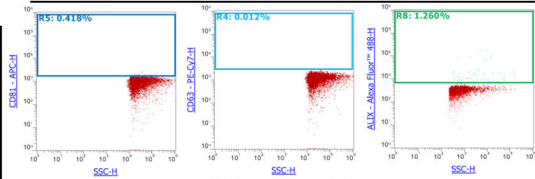

EVs from Drosophila (UC)

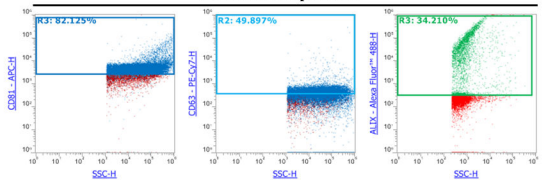

EVs from Drosophila (S-O)

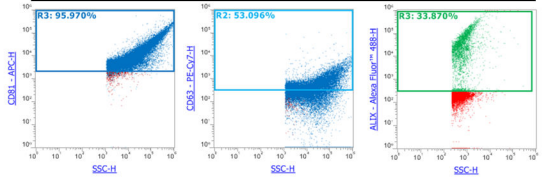

EVs from Drosophila (UC)

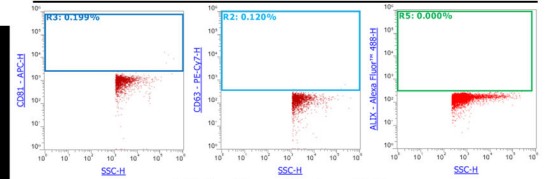

EVs from Colo205 (UC)

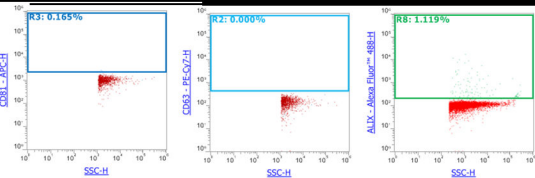

EVs from Colo205 (S-O)

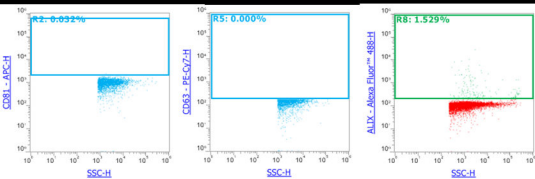

Supplement: s1 [file s1]
