# Supplementary material for: Salting-Out Approach Is Worthy of Comparison with Ultracentrifugation for Extracellular Vesicle Isolation from Tumor and Healthy Models
Source: MDPI journal article supplement (doi:10.3390/biom11121857), 2021-12-10
Supplement: s1 [file s1]

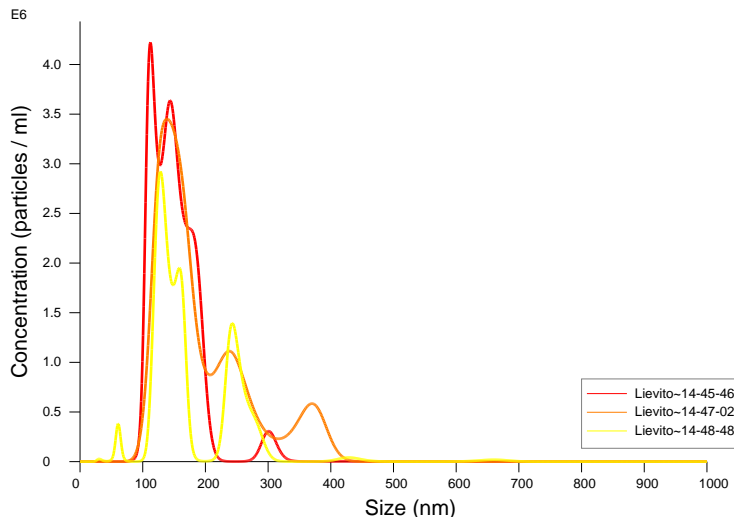

FTLA Concentration / Size graph for Experiment:  
Lievito By4742 NaAc 2020-02-14 14-45-33

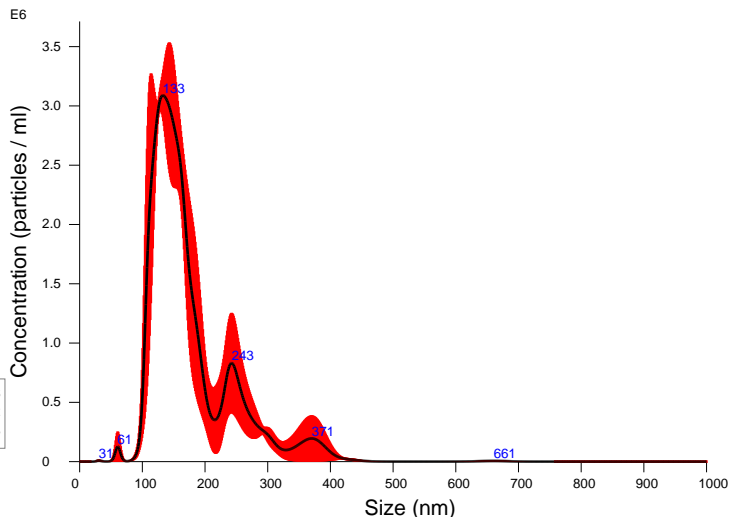

Averaged FTLA Concentration / Size for Experiment:  
Lievito By4742 NaAc 2020-02-14 14-45-33  
Error bars indicate + / - 1 standard error of the mean

### Included Files

Lievito By4742 NaAc 2020-02-14 14-45-46  
Lievito By4742 NaAc 2020-02-14 14-47-02  
Lievito By4742 NaAc 2020-02-14 14-48-48

### Details

NTA Version: NTA 3.2 Dev Build 3.2.16  
Script Used: SOP Standard Measurement 02-45-33PM 14~  
Time Captured: 14:45:33 14/02/2020  
Operator: Antonio  
Pre-treatment:  
Sample Name: Lievito By4742 NaAc  
Diluent:  
Remarks:

### Capture Settings

Camera Type: sCMOS  
Laser Type: Green  
Camera Level: 12  
Slider Shutter: 1200  
Slider Gain: 146  
FPS: 25.0  
Number of Frames: 1498  
Temperature: 23.8 - 23.9 °C  
Viscosity: (Water) 0.912 - 0.915 cP  
Dilution factor: Dilution not recorded

### Analysis Settings

Detect Threshold: 5  
Blur Size: Auto  
Max Jump Distance: Auto: 9.6 - 13.0 pix

### Results

Stats: Merged Data

Mean: 174.5 nm  
Mode: 132.8 nm  
SD: 67.2 nm  
D10: 114.3 nm  
D50: 152.8 nm  
D90: 263.8 nm

Stats: Mean +/- Standard Error

Mean: 173.8 +/- 12.6 nm  
Mode: 126.4 +/- 7.7 nm  
SD: 62.8 +/- 11.6 nm  
D10: 116.1 +/- 3.8 nm  
D50: 153.0 +/- 6.2 nm  
D90: 257.3 +/- 38.2 nm  
Concentration: 2.81e+008 +/- 4.95e+007 particles/ml  
14.3 +/- 2.5 particles/frame  
18.8 +/- 2.8 centres/frame

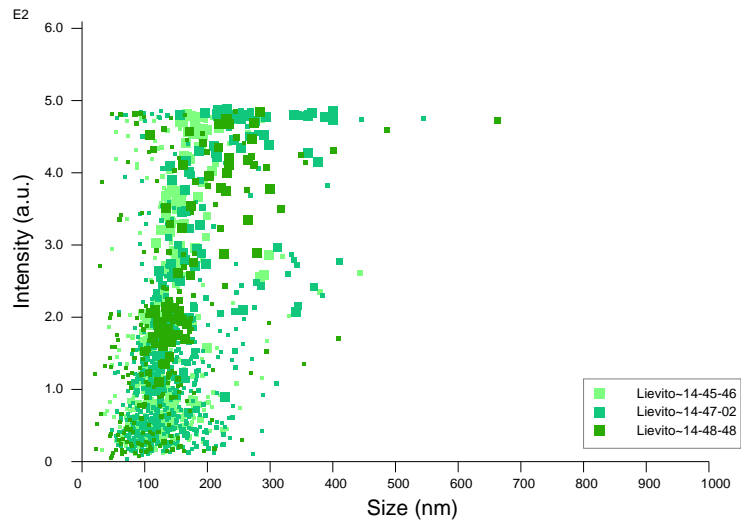

Intensity / Size graph for Experiment:  
Lievito By4742 NaAc 2020-02-14 14-45-33

**Script Used: (Full Text):**

SOP Standard Measurement 02-45-33PM 14Feb2020.txt
