# Supplementary material for: Salting-Out Approach Is Worthy of Comparison with Ultracentrifugation for Extracellular Vesicle Isolation from Tumor and Healthy Models
Source: MDPI journal article supplement (doi:10.3390/biom11121857), 2021-12-10
Supplement: s1 [file s1]

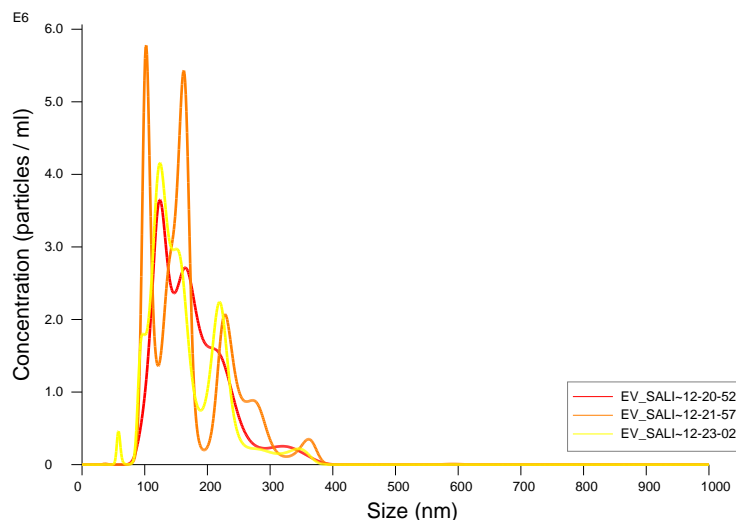

FTLA Concentration / Size graph for Experiment:  
EV\_SALIVA\_ULTRA\_PZ3 2021-09-03 12-20-45

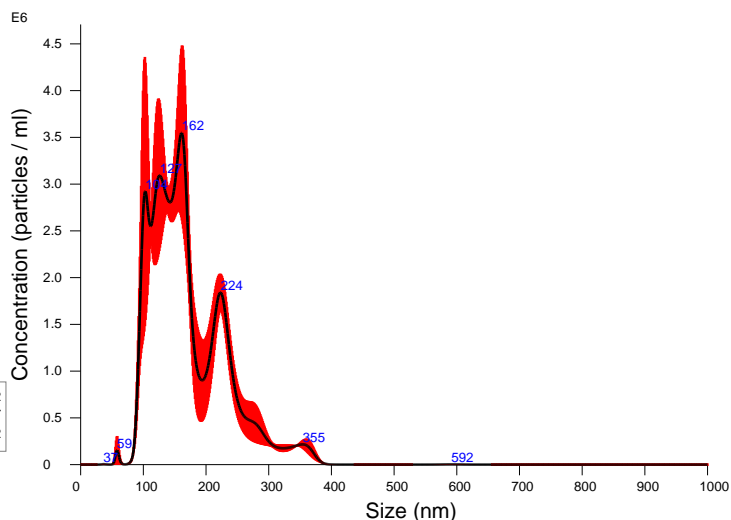

Averaged FTLA Concentration / Size for Experiment:  
EV\_SALIVA\_ULTRA\_PZ3 2021-09-03 12-20-45  
Error bars indicate + / - 1 standard error of the mean

## Included Files

EV\_SALIVA\_ULTRA\_PZ3 2021-09-03 12-20-52  
EV\_SALIVA\_ULTRA\_PZ3 2021-09-03 12-21-57  
EV\_SALIVA\_ULTRA\_PZ3 2021-09-03 12-23-02

## Details

NTA Version: NTA 3.2 Dev Build 3.2.16  
Script Used: SOP Standard Measurement 12-20-45PM 03~  
Time Captured: 12:20:45 03/09/2021  
Operator: simo  
Pre-treatment:  
Sample Name: EV\_SALIVA\_ULTRA\_PZ3  
Diluent:  
Remarks: 1:1000

## Capture Settings

Camera Type: sCMOS  
Laser Type: Green  
Camera Level: 14  
Slider Shutter: 1259  
Slider Gain: 366  
FPS: 25.0  
Number of Frames: 1498  
Temperature: 25.2 °C  
Viscosity: (Water) 0.883 - 0.885 cP  
Dilution factor: Dilution not recorded  
Syringe Pump Speed: 50

## Analysis Settings

Detect Threshold: 5  
Blur Size: Auto  
Max Jump Distance: Auto: 11.1 - 13.2 pix

## Results

Stats: Merged Data

Mean: 170.6 nm  
Mode: 161.0 nm  
SD: 60.1 nm  
D10: 104.6 nm  
D50: 156.1 nm  
D90: 248.8 nm

Stats: Mean +/- Standard Error

Mean: 170.5 +/- 3.0 nm  
Mode: 116.9 +/- 7.4 nm  
SD: 59.5 +/- 3.0 nm  
D10: 106.7 +/- 3.9 nm  
D50: 156.0 +/- 4.2 nm  
D90: 247.5 +/- 9.4 nm  
Concentration: 3.74e+008 +/- 2.11e+007 particles/ml  
19.0 +/- 1.1 particles/frame  
22.5 +/- 1.2 centres/frame

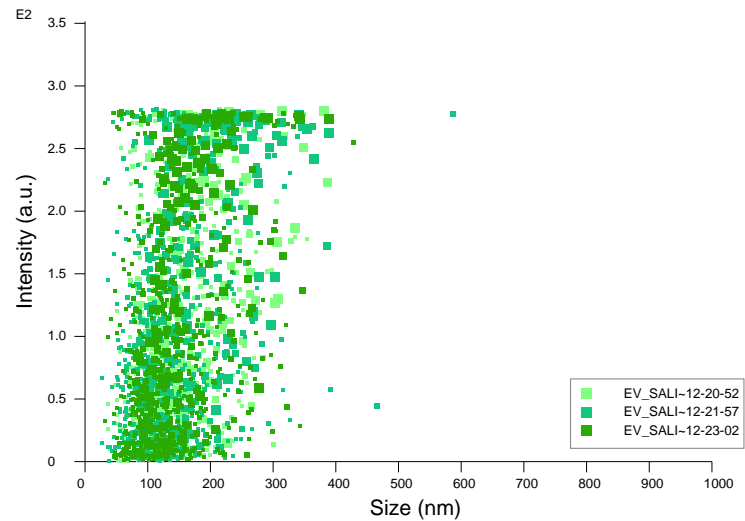

Intensity / Size graph for Experiment:  
EV\_SALIVA\_ULTRA\_PZ3 2021-09-03 12-20-45

**Script Used: (Full Text):**

SOP Standard Measurement 12-20-45PM 03Sep2021.txt
