# Supplementary material for: Salting-Out Approach Is Worthy of Comparison with Ultracentrifugation for Extracellular Vesicle Isolation from Tumor and Healthy Models
Source: MDPI journal article supplement (doi:10.3390/biom11121857), 2021-12-10
Supplement: s1 [file s1]

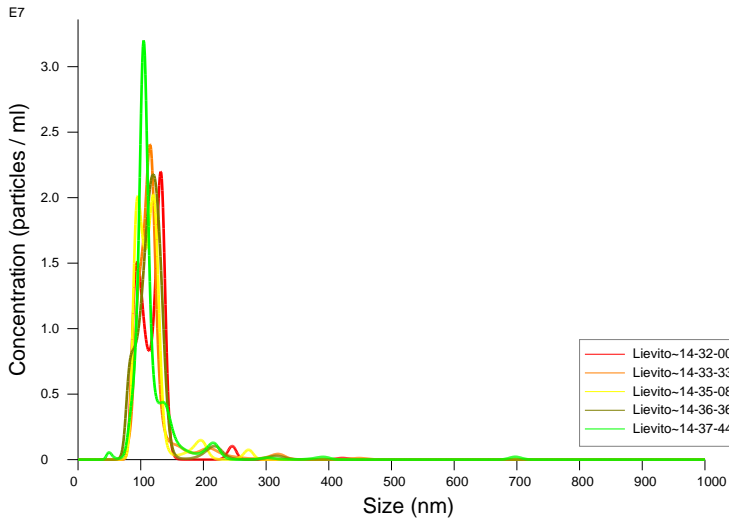

FTLA Concentration / Size graph for Experiment:  
Lievito By4742 Ultra 2020-02-14 14-31-50

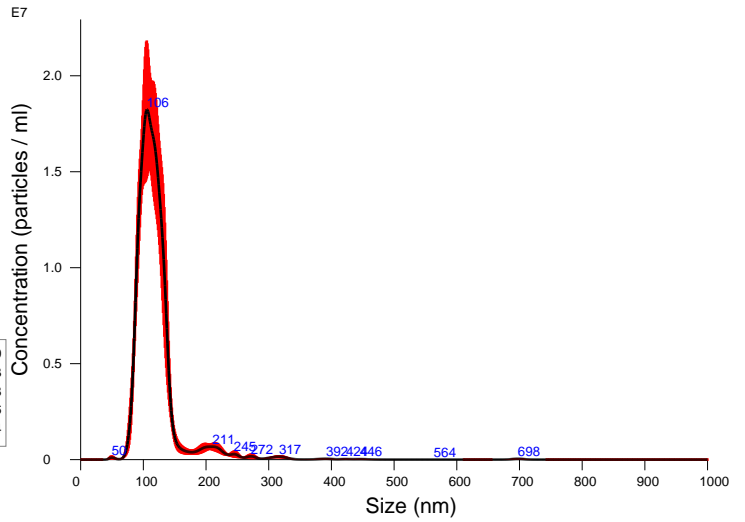

Averaged FTLA Concentration / Size for Experiment:  
Lievito By4742 Ultra 2020-02-14 14-31-50  
Error bars indicate + / - 1 standard error of the mean

### Included Files

Lievito By4742 Ultra 2020-02-14 14-32-00  
Lievito By4742 Ultra 2020-02-14 14-33-33  
Lievito By4742 Ultra 2020-02-14 14-35-08  
Lievito By4742 Ultra 2020-02-14 14-36-36  
Lievito By4742 Ultra 2020-02-14 14-37-44

### Details

NTA Version: NTA 3.2 Dev Build 3.2.16  
Script Used: SOP Standard Measurement 02-31-50PM 14~  
Time Captured: 14:31:50 14/02/2020  
Operator: Antonio  
Pre-treatment:  
Sample Name: Lievito By4742 Ultra  
Diluent:  
Remarks:

### Capture Settings

Camera Type: sCMOS  
Laser Type: Green  
Camera Level: 14  
Slider Shutter: 1259  
Slider Gain: 366  
FPS: 25.0  
Number of Frames: 1498  
Temperature: 23.3 - 23.6 °C  
Viscosity: (Water) 0.918 - 0.924 cP  
Dilution factor: Dilution not recorded

### Analysis Settings

Detect Threshold: 5  
Blur Size: Auto  
Max Jump Distance: Auto: 12.8 - 13.2 pix

### Results

Stats: Merged Data

Mean: 119.8 nm  
Mode: 105.9 nm  
SD: 41.0 nm  
D10: 90.3 nm  
D50: 111.7 nm  
D90: 139.6 nm

Stats: Mean +/- Standard Error

Mean: 119.9 +/- 1.1 nm  
Mode: 118.2 +/- 4.4 nm  
SD: 39.7 +/- 5.4 nm  
D10: 90.3 +/- 1.0 nm  
D50: 112.6 +/- 2.1 nm  
D90: 142.6 +/- 4.1 nm  
Concentration: 8.78e+008 +/- 2.55e+007 particles/ml  
44.6 +/- 1.3 particles/frame  
51.5 +/- 2.0 centres/frame

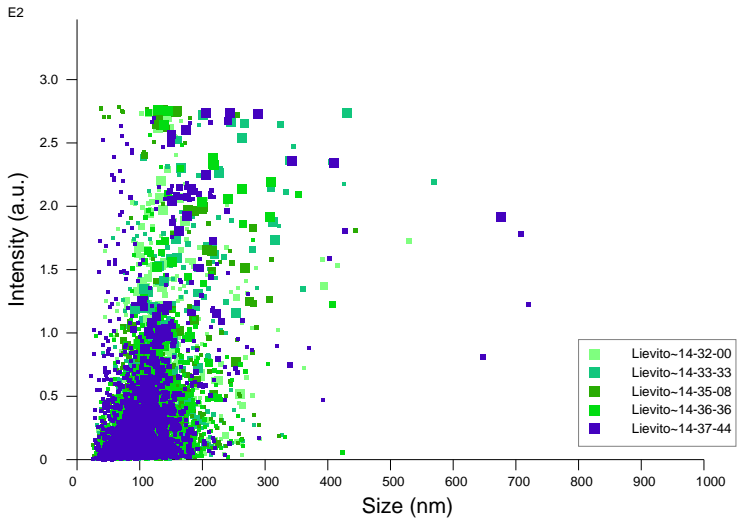

Intensity / Size graph for Experiment:  
Lievito By4742 Ultra 2020-02-14 14-31-50

**Script Used: (Full Text):**

SOP Standard Measurement 02-31-50PM 14Feb2020.txt
