# Supplementary material for: Salting-Out Approach Is Worthy of Comparison with Ultracentrifugation for Extracellular Vesicle Isolation from Tumor and Healthy Models
Source: MDPI journal article supplement (doi:10.3390/biom11121857), 2021-12-10
Supplement: s1 [file s1]

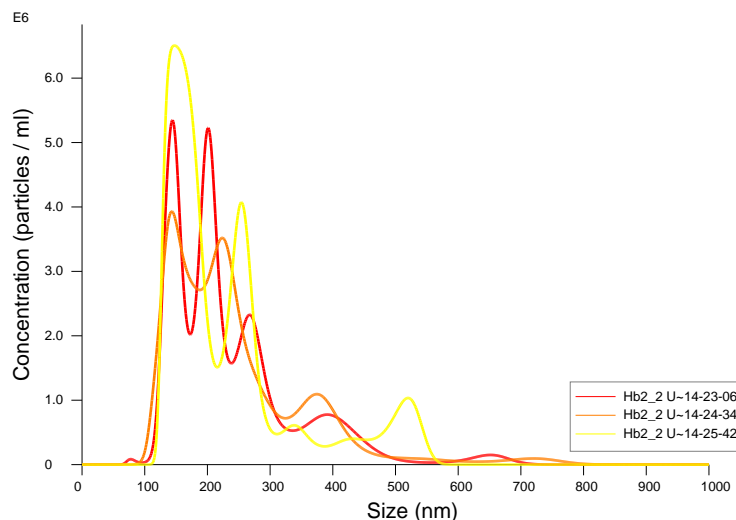

FTLA Concentration / Size graph for Experiment:  
Hb2\_2 Ultra 2020-02-17 14-22-40

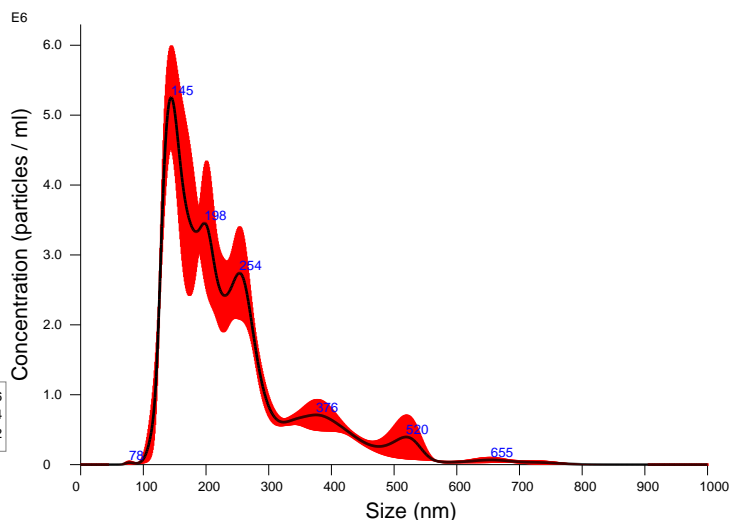

Averaged FTLA Concentration / Size for Experiment:  
Hb2\_2 Ultra 2020-02-17 14-22-40  
Error bars indicate + / - 1 standard error of the mean

### Included Files

Hb2\_2 Ultra 2020-02-17 14-23-06  
Hb2\_2 Ultra 2020-02-17 14-24-34  
Hb2\_2 Ultra 2020-02-17 14-25-42

### Details

NTA Version: NTA 3.2 Dev Build 3.2.16  
Script Used: SOP Standard Measurement 02-22-40PM 17~  
Time Captured: 14:22:40 17/02/2020  
Operator: Antonio  
Pre-treatment:  
Sample Name: Hb2\_2 Ultra  
Diluent:  
Remarks:

### Capture Settings

Camera Type: sCMOS  
Laser Type: Green  
Camera Level: 12  
Slider Shutter: 1200  
Slider Gain: 146  
FPS: 25.0  
Number of Frames: 1498  
Temperature: 22.0 °C  
Viscosity: (Water) 1.0 cP  
Dilution factor: Dilution not recorded

### Analysis Settings

Detect Threshold: 5  
Blur Size: Auto  
Max Jump Distance: Auto: 9.8 - 10.5 pix

### Results

Stats: Merged Data

Mean: 238.3 nm  
Mode: 144.3 nm  
SD: 109.0 nm  
D10: 137.2 nm  
D50: 205.9 nm  
D90: 395.3 nm

Stats: Mean +/- Standard Error

Mean: 238.5 +/- 2.2 nm  
Mode: 144.9 +/- 1.3 nm  
SD: 108.8 +/- 2.4 nm  
D10: 137.0 +/- 1.0 nm  
D50: 204.6 +/- 7.0 nm  
D90: 403.1 +/- 16.1 nm  
Concentration: 6.80e+008 +/- 3.82e+007 particles/ml  
34.5 +/- 1.9 particles/frame  
40.8 +/- 1.1 centres/frame

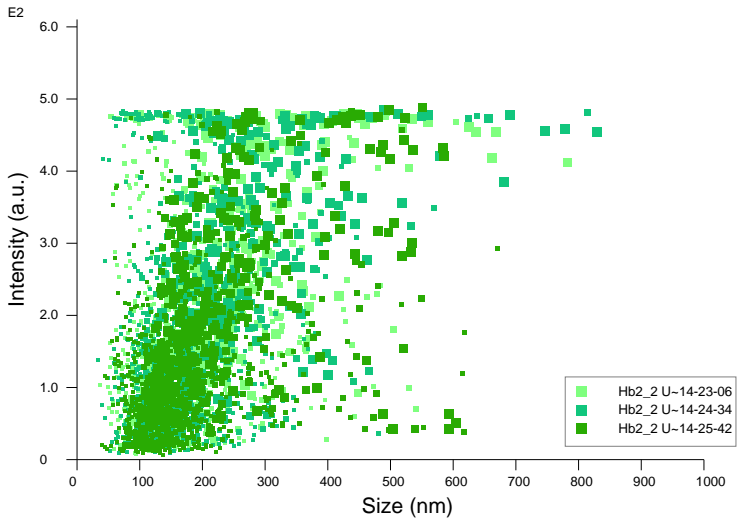

Intensity / Size graph for Experiment:  
Hb2\_2 Ultra 2020-02-17 14-22-40

**Script Used: (Full Text):**

SOP Standard Measurement 02-22-40PM 17Feb2020.txt
