# Supplementary material for: Salting-Out Approach Is Worthy of Comparison with Ultracentrifugation for Extracellular Vesicle Isolation from Tumor and Healthy Models
Source: MDPI journal article supplement (doi:10.3390/biom11121857), 2021-12-10
Supplement: s1 [file s1]

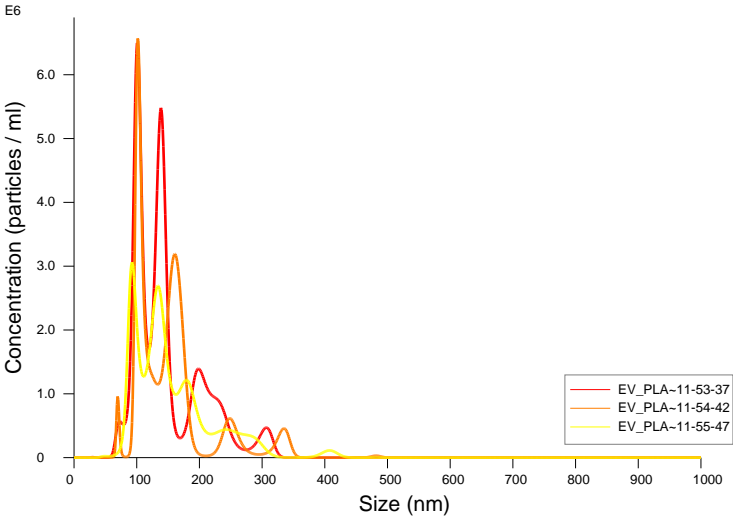

FTLA Concentration / Size graph for Experiment:  
EV\_PLASMA\_S-O\_PZ3 2021-09-03 11-53-29

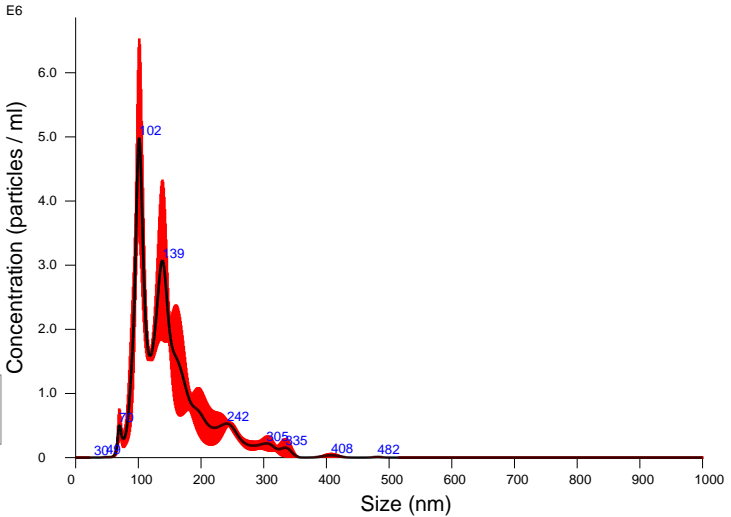

Averaged FTLA Concentration / Size for Experiment:  
EV\_PLASMA\_S-O\_PZ3 2021-09-03 11-53-29  
Error bars indicate + / - 1 standard error of the mean

Included Files

EV\_PLASMA\_S-O\_PZ3 2021-09-03 11-53-37  
EV\_PLASMA\_S-O\_PZ3 2021-09-03 11-54-42  
EV\_PLASMA\_S-O\_PZ3 2021-09-03 11-55-47

Details

NTA Version: NTA 3.2 Dev Build 3.2.16  
Script Used: SOP Standard Measurement 11-53-29AM 03~  
Time Captured: 11:53:29 03/09/2021  
Operator: simo  
Pre-treatment:  
Sample Name: EV\_PLASMA\_S-O\_PZ3  
Diluent:  
Remarks: 1:1000

Capture Settings

Camera Type: sCMOS  
Laser Type: Green  
Camera Level: 14  
Slider Shutter: 1259  
Slider Gain: 366  
FPS: 25.0  
Number of Frames: 1498  
Temperature: 24.5 - 24.6 °C  
Viscosity: (Water) 0.897 - 0.899 cP  
Dilution factor: Dilution not recorded  
Syringe Pump Speed: 50

Analysis Settings

Detect Threshold: 5  
Blur Size: Auto  
Max Jump Distance: Auto: 12.8 - 13.3 pix

Results

Stats: Merged Data

Mean: 150.7 nm  
Mode: 101.3 nm  
SD: 59.2 nm  
D10: 95.0 nm  
D50: 135.9 nm  
D90: 236.7 nm

Stats: Mean +/- Standard Error

Mean: 151.2 +/- 2.2 nm  
Mode: 98.5 +/- 3.0 nm  
SD: 59.6 +/- 2.5 nm  
D10: 94.6 +/- 2.3 nm  
D50: 137.6 +/- 2.5 nm  
D90: 239.4 +/- 6.3 nm  
Concentration: 2.82e+008 +/- 3.31e+007 particles/ml  
14.3 +/- 1.7 particles/frame  
18.4 +/- 3.7 centres/frame

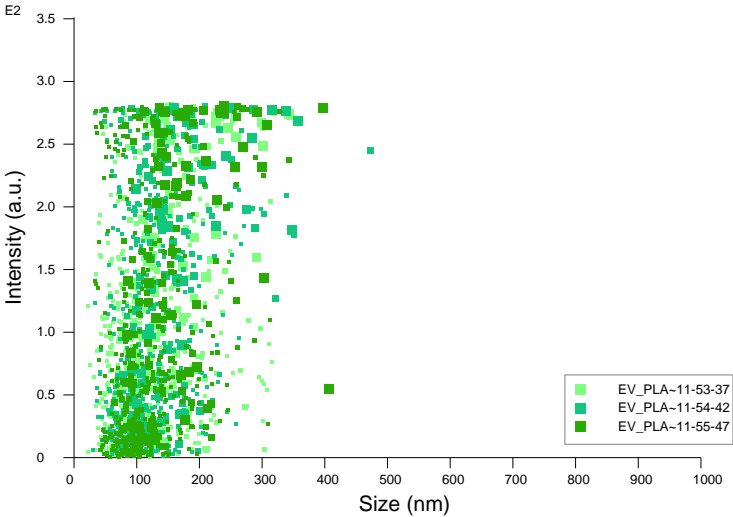

Intensity / Size graph for Experiment:  
EV\_PLASMA\_S-O\_PZ3 2021-09-03 11-53-29

**Script Used: (Full Text):**

SOP Standard Measurement 11-53-29AM 03Sep2021.txt
