# Supplementary material for: Salting-Out Approach Is Worthy of Comparison with Ultracentrifugation for Extracellular Vesicle Isolation from Tumor and Healthy Models
Source: MDPI journal article supplement (doi:10.3390/biom11121857), 2021-12-10
Supplement: s1 [file s1]

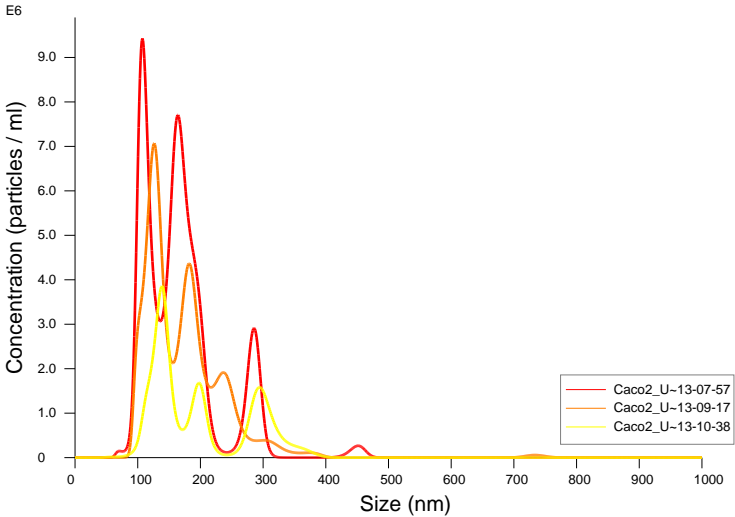

FTLA Concentration / Size graph for Experiment:  
Caco2\_U 2019-11-19 13-07-30

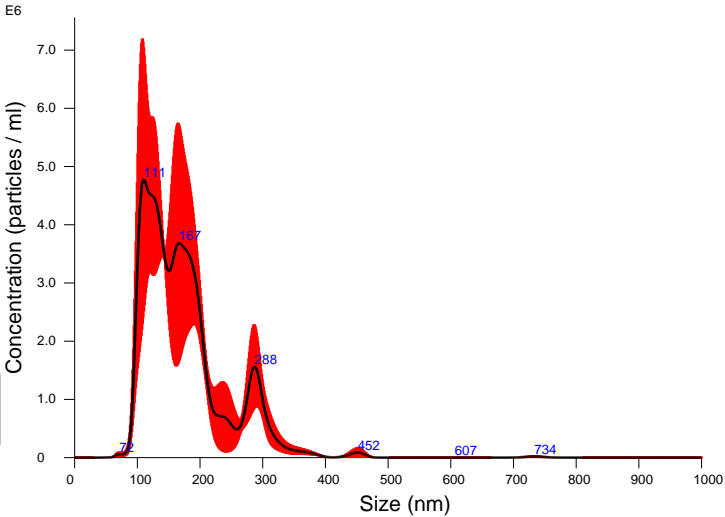

Averaged FTLA Concentration / Size for Experiment:  
Caco2\_U 2019-11-19 13-07-30  
Error bars indicate + / - 1 standard error of the mean

**Included Files**

Caco2\_U 2019-11-19 13-07-57  
Caco2\_U 2019-11-19 13-09-17  
Caco2\_U 2019-11-19 13-10-38

**Details**

NTA Version: NTA 3.2 Dev Build 3.2.16  
Script Used: SOP Standard Measurement 01-07-30PM 19~  
Time Captured: 13:07:30 19/11/2019  
Operator: Antonio  
Pre-treatment:  
Sample Name: Caco2\_U  
Diluent:  
Remarks:

**Capture Settings**

Camera Type: sCMOS  
Laser Type: Green  
Camera Level: 14  
Slider Shutter: 1259  
Slider Gain: 366  
FPS: 25.0  
Number of Frames: 1498  
Temperature: 23.0 °C  
Viscosity: (Water) 0.9 cP  
Dilution factor: Dilution not recorded

**Analysis Settings**

Detect Threshold: 5  
Blur Size: Auto  
Max Jump Distance: Auto: 9.9 - 10.6 pix

**Results**

Stats: Merged Data

Mean: 173.9 nm  
Mode: 110.3 nm  
SD: 67.3 nm  
D10: 106.7 nm  
D50: 158.8 nm  
D90: 279.7 nm

Stats: Mean +/- Standard Error

Mean: 178.6 +/- 9.5 nm  
Mode: 124.2 +/- 9.1 nm  
SD: 68.3 +/- 4.2 nm  
D10: 111.0 +/- 4.9 nm  
D50: 160.9 +/- 2.7 nm  
D90: 276.4 +/- 18.4 nm  
Concentration: 5.24e+008 +/- 1.32e+008 particles/ml  
26.6 +/- 6.7 particles/frame  
37.0 +/- 9.5 centres/frame

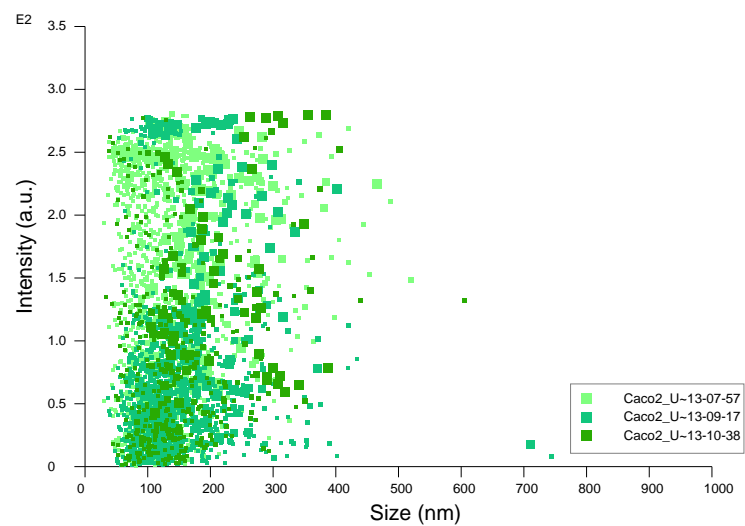

Intensity / Size graph for Experiment:  
Caco2\_U 2019-11-19 13-07-30

**Script Used: (Full Text):**

SOP Standard Measurement 01-07-30PM 19Nov2019.txt
