# Supplementary material for: Salting-Out Approach Is Worthy of Comparison with Ultracentrifugation for Extracellular Vesicle Isolation from Tumor and Healthy Models
Source: MDPI journal article supplement (doi:10.3390/biom11121857), 2021-12-10
Supplement: s1 [file s1]

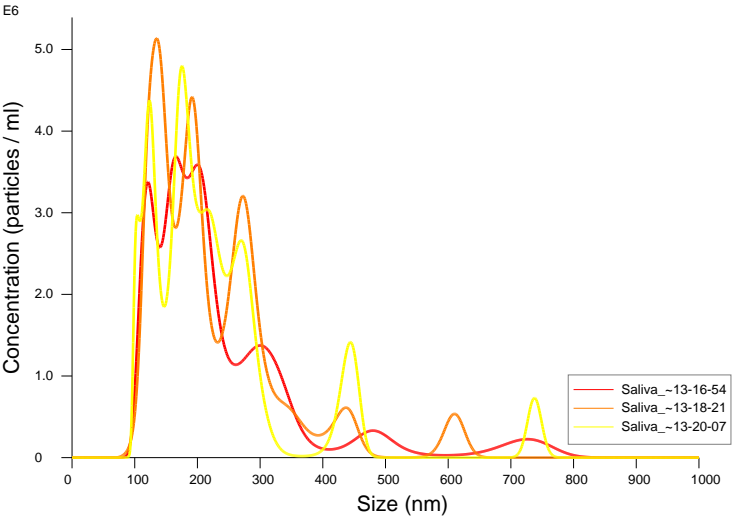

FTLA Concentration / Size graph for Experiment:  
Saliva\_U 2019-11-20 13-16-39

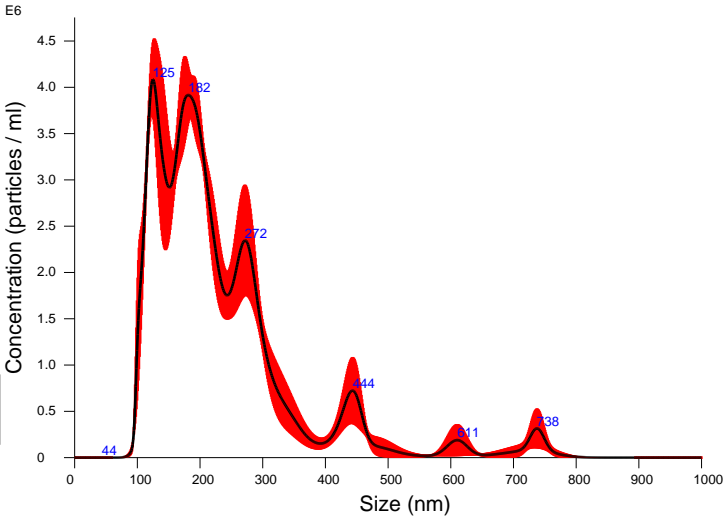

Averaged FTLA Concentration / Size for Experiment:  
Saliva\_U 2019-11-20 13-16-39  
Error bars indicate + / - 1 standard error of the mean

|                                                                                                                                                                                                                                                                                                                                                                                                                                                                                                                                                                                                                                                                                                                                                                                                                                                                                                                                                                                                |                                                                                                                                                                                                                                                                                                                                                                                                                                                                                                                                                                                                                                                                   |
|------------------------------------------------------------------------------------------------------------------------------------------------------------------------------------------------------------------------------------------------------------------------------------------------------------------------------------------------------------------------------------------------------------------------------------------------------------------------------------------------------------------------------------------------------------------------------------------------------------------------------------------------------------------------------------------------------------------------------------------------------------------------------------------------------------------------------------------------------------------------------------------------------------------------------------------------------------------------------------------------|-------------------------------------------------------------------------------------------------------------------------------------------------------------------------------------------------------------------------------------------------------------------------------------------------------------------------------------------------------------------------------------------------------------------------------------------------------------------------------------------------------------------------------------------------------------------------------------------------------------------------------------------------------------------|
| <div><div>Included Files</div><div>Saliva_U 2019-11-20 13-16-54<br/>Saliva_U 2019-11-20 13-18-21<br/>Saliva_U 2019-11-20 13-20-07</div><div><div>Details</div><div><div>NTA Version:NTA 3.2 Dev Build 3.2.16</div><div>Script Used:SOP Standard Measurement 01-16-39PM 20~</div><div>Time Captured:13:16:39 20/11/2019</div><div>Operator:Antonio</div><div>Pre-treatment:</div><div>Sample Name:Saliva_U</div><div>Diluent:</div><div>Remarks:</div></div><div><div>Capture Settings</div><div><div>Camera Type:sCMOS</div><div>Laser Type:Green</div><div>Camera Level:12</div><div>Slider Shutter:1200</div><div>Slider Gain:146</div><div>FPS:25.0</div><div>Number of Frames:1498</div><div>Temperature:23.0 °C</div><div>Viscosity:(Water) 0.9 cP</div><div>Dilution factor:Dilution not recorded</div></div><div><div>Analysis Settings</div><div><div>Detect Threshold:5</div><div>Blur Size:Auto</div><div>Max Jump Distance:Auto: 9.5 - 10.9 pix</div></div></div></div></div></div> | <div><div>Results</div><div><div>Stats: Merged Data</div><div><div>Mean:231.0 nm</div><div>Mode:124.9 nm</div><div>SD:120.9 nm</div><div>D10:121.9 nm</div><div>D50:197.5 nm</div><div>D90:363.9 nm</div></div><div><div>Stats: Mean +/- Standard Error</div><div><div>Mean:231.2 +/- 3.1 nm</div><div>Mode:158.7 +/- 12.2 nm</div><div>SD:120.9 +/- 7.7 nm</div><div>D10:121.9 +/- 2.0 nm</div><div>D50:197.6 +/- 0.4 nm</div><div>D90:378.2 +/- 21.5 nm</div></div><div><div>Concentration:</div><div><div>6.69e+008 +/- 2.81e+007 particles/ml</div><div>34.0 +/- 1.4 particles/frame</div><div>48.2 +/- 4.8 centres/frame</div></div></div></div></div></div> |
|------------------------------------------------------------------------------------------------------------------------------------------------------------------------------------------------------------------------------------------------------------------------------------------------------------------------------------------------------------------------------------------------------------------------------------------------------------------------------------------------------------------------------------------------------------------------------------------------------------------------------------------------------------------------------------------------------------------------------------------------------------------------------------------------------------------------------------------------------------------------------------------------------------------------------------------------------------------------------------------------|-------------------------------------------------------------------------------------------------------------------------------------------------------------------------------------------------------------------------------------------------------------------------------------------------------------------------------------------------------------------------------------------------------------------------------------------------------------------------------------------------------------------------------------------------------------------------------------------------------------------------------------------------------------------|

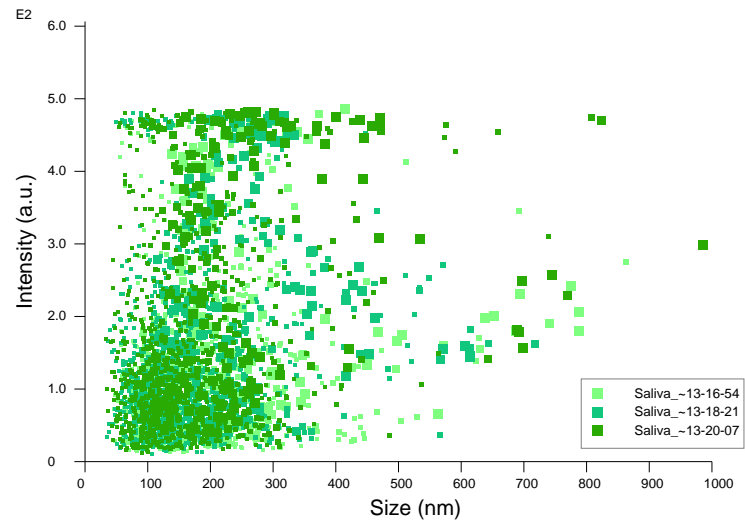

Intensity / Size graph for Experiment:  
Saliva\_U 2019-11-20 13-16-39

**Script Used: (Full Text):**

SOP Standard Measurement 01-16-39PM 20Nov2019.txt
