# Supplementary material for: Salting-Out Approach Is Worthy of Comparison with Ultracentrifugation for Extracellular Vesicle Isolation from Tumor and Healthy Models
Source: MDPI journal article supplement (doi:10.3390/biom11121857), 2021-12-10
Supplement: s1 [file s1]

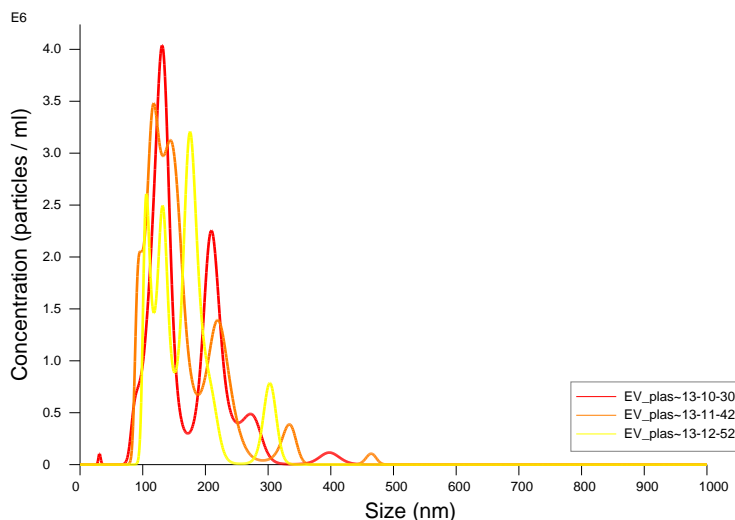

FTLA Concentration / Size graph for Experiment:  
EV\_plasma\_UC\_pz2 2021-09-02 13-10-09

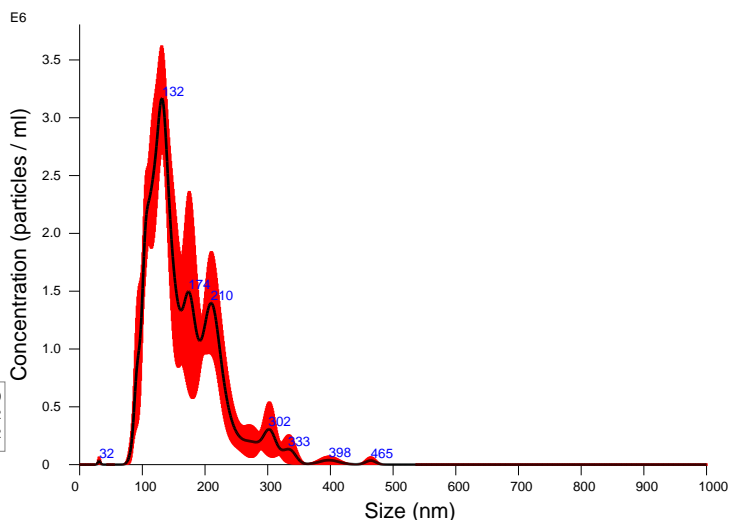

Averaged FTLA Concentration / Size for Experiment:  
EV\_plasma\_UC\_pz2 2021-09-02 13-10-09  
Error bars indicate + / - 1 standard error of the mean

### Included Files

EV\_plasma\_UC\_pz2 2021-09-02 13-10-30  
EV\_plasma\_UC\_pz2 2021-09-02 13-11-42  
EV\_plasma\_UC\_pz2 2021-09-02 13-12-52

### Details

NTA Version: NTA 3.2 Dev Build 3.2.16  
Script Used: SOP Standard Measurement 01-10-09PM 02~  
Time Captured: 13:10:09 02/09/2021  
Operator: simo  
Pre-treatment:  
Sample Name: EV\_plasma\_UC\_pz2  
Diluent:  
Remarks: 1:1000

### Capture Settings

Camera Type: sCMOS  
Laser Type: Green  
Camera Level: 13  
Slider Shutter: 1232  
Slider Gain: 219  
FPS: 25.0  
Number of Frames: 1498  
Temperature: 24.2 - 24.2 °C  
Viscosity: (Water) 0.904 - 0.906 cP  
Dilution factor: Dilution not recorded  
Syringe Pump Speed: 50

### Analysis Settings

Detect Threshold: 5  
Blur Size: Auto  
Max Jump Distance: Auto: 11.9 - 12.6 pix

### Results

Stats: Merged Data

Mean: 165.6 nm  
Mode: 131.2 nm  
SD: 58.8 nm  
D10: 105.7 nm  
D50: 147.5 nm  
D90: 235.1 nm

Stats: Mean +/- Standard Error

Mean: 166.0 +/- 2.6 nm  
Mode: 141.3 +/- 17.5 nm  
SD: 58.2 +/- 2.7 nm  
D10: 106.0 +/- 2.1 nm  
D50: 150.3 +/- 7.3 nm  
D90: 232.4 +/- 7.0 nm  
Concentration: 2.71e+008 +/- 2.39e+007 particles/ml  
13.8 +/- 1.2 particles/frame  
15.7 +/- 1.5 centres/frame

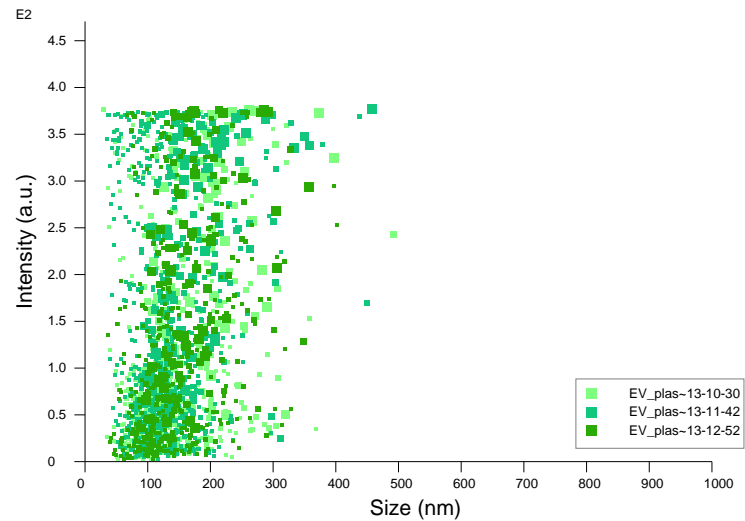

Intensity / Size graph for Experiment:  
EV\_plasma\_UC\_pz2 2021-09-02 13-10-09

**Script Used: (Full Text):**

SOP Standard Measurement 01-10-09PM 02Sep2021.txt
