# Supplementary material for: Salting-Out Approach Is Worthy of Comparison with Ultracentrifugation for Extracellular Vesicle Isolation from Tumor and Healthy Models
Source: MDPI journal article supplement (doi:10.3390/biom11121857), 2021-12-10
Supplement: s1 [file s1]

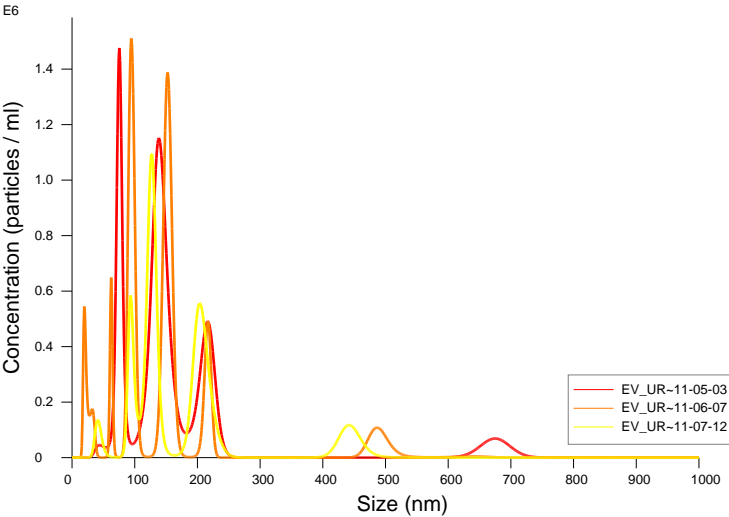

FTLA Concentration / Size graph for Experiment:  
EV\_URINE\_S-O\_PZ2 2021-09-03 11-04-53

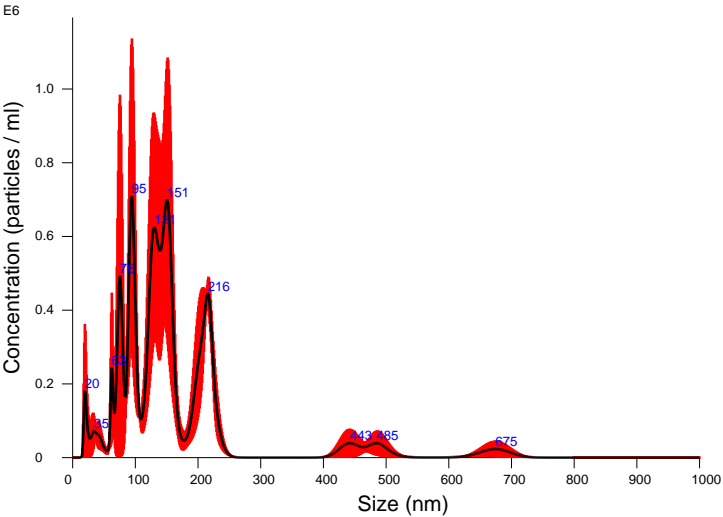

Averaged FTLA Concentration / Size for Experiment:  
EV\_URINE\_S-O\_PZ2 2021-09-03 11-04-53  
Error bars indicate + / - 1 standard error of the mean

|                                                                                                                                                                                                                                                                                                                                                                                                                                                                                                                                                                                                                                                                                                                                                                                                                                                                                                                                                                                                                                                |                                                                                                                                                                                                                                                                                                                                                                                                                                                                                                                                                                                                                                       |
|------------------------------------------------------------------------------------------------------------------------------------------------------------------------------------------------------------------------------------------------------------------------------------------------------------------------------------------------------------------------------------------------------------------------------------------------------------------------------------------------------------------------------------------------------------------------------------------------------------------------------------------------------------------------------------------------------------------------------------------------------------------------------------------------------------------------------------------------------------------------------------------------------------------------------------------------------------------------------------------------------------------------------------------------|---------------------------------------------------------------------------------------------------------------------------------------------------------------------------------------------------------------------------------------------------------------------------------------------------------------------------------------------------------------------------------------------------------------------------------------------------------------------------------------------------------------------------------------------------------------------------------------------------------------------------------------|
| <div>Included Files</div> <div>EV_URINE_S-O_PZ2 2021-09-03 11-05-03<br/>EV_URINE_S-O_PZ2 2021-09-03 11-06-07<br/>EV_URINE_S-O_PZ2 2021-09-03 11-07-12</div> <div>Details</div> <div><div>NTA Version:NTA 3.2 Dev Build 3.2.16</div><div>Script Used:SOP Standard Measurement 11-04-53AM 03~</div><div>Time Captured:11:04:53 03/09/2021</div><div>Operator:simo</div><div>Pre-treatment:</div><div>Sample Name:EV_URINE_S-O_PZ2</div><div>Diluent:</div><div>Remarks:1:1000</div></div> <div>Capture Settings</div> <div><div>Camera Type:sCMOS</div><div>Laser Type:Green</div><div>Camera Level:15</div><div>Slider Shutter:1206</div><div>Slider Gain:366</div><div>FPS:25.0</div><div>Number of Frames:1498</div><div>Temperature:23.2 - 23.3 °C</div><div>Viscosity:(Water) 0.924 - 0.926 cP</div><div>Dilution factor:Dilution not recorded</div><div>Syringe Pump Speed:50</div></div> <div>Analysis Settings</div> <div><div>Detect Threshold:5</div><div>Blur Size:Auto</div><div>Max Jump Distance:Auto: 14.0 - 26.9 pix</div></div> | <div>Results</div> <div><div>Stats: Merged Data</div><div><div>Mean:165.1 nm</div><div>Mode:94.2 nm</div><div>SD:116.1 nm</div><div>D10:74.0 nm</div><div>D50:139.4 nm</div><div>D90:224.2 nm</div></div><div><div>Stats: Mean +/- Standard Error</div><div><div>Mean:165.6 +/- 7.5 nm</div><div>Mode:99.0 +/- 15.1 nm</div><div>SD:113.1 +/- 8.8 nm</div><div>D10:75.6 +/- 9.4 nm</div><div>D50:139.0 +/- 3.1 nm</div><div>D90:229.0 +/- 7.9 nm</div></div><div><div>Concentration:</div><div>6.49e+007 +/- 6.82e+006 particles/ml</div><div>3.3 +/- 0.3 particles/frame</div><div>6.6 +/- 1.4 centres/frame</div></div></div></div> |
|------------------------------------------------------------------------------------------------------------------------------------------------------------------------------------------------------------------------------------------------------------------------------------------------------------------------------------------------------------------------------------------------------------------------------------------------------------------------------------------------------------------------------------------------------------------------------------------------------------------------------------------------------------------------------------------------------------------------------------------------------------------------------------------------------------------------------------------------------------------------------------------------------------------------------------------------------------------------------------------------------------------------------------------------|---------------------------------------------------------------------------------------------------------------------------------------------------------------------------------------------------------------------------------------------------------------------------------------------------------------------------------------------------------------------------------------------------------------------------------------------------------------------------------------------------------------------------------------------------------------------------------------------------------------------------------------|

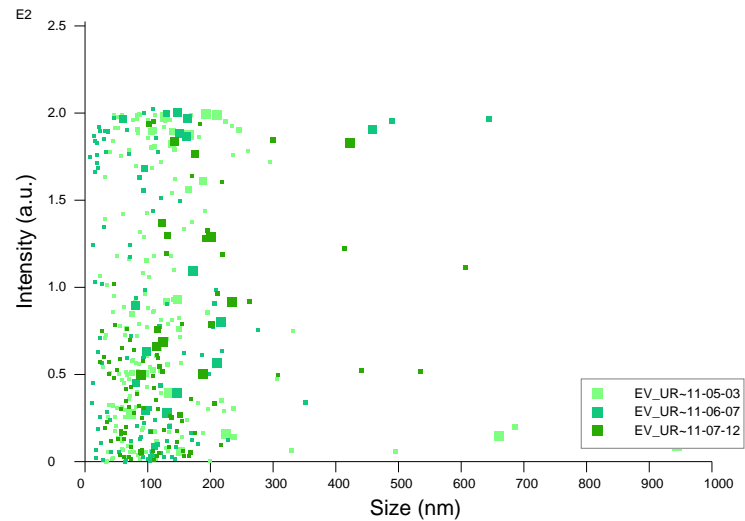

Intensity / Size graph for Experiment:  
EV\_URINE\_S-O\_PZ2 2021-09-03 11-04-53

**Script Used: (Full Text):**

SOP Standard Measurement 11-04-53AM 03Sep2021.txt
