# Supplementary figures and images for: Salting-Out Approach Is Worthy of Comparison with Ultracentrifugation for Extracellular Vesicle Isolation from Tumor and Healthy Models
Source: MDPI journal article supplement (doi:10.3390/biom11121857), 2021-12-10

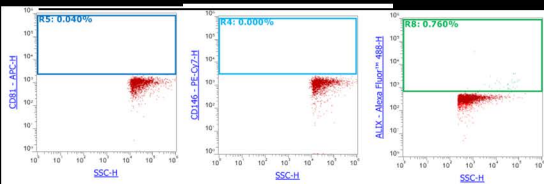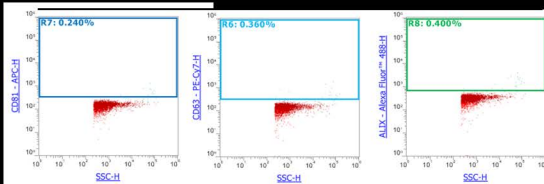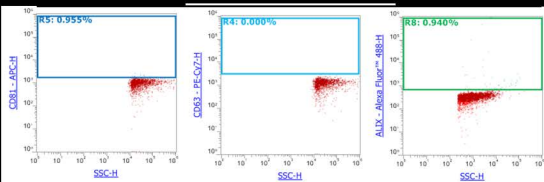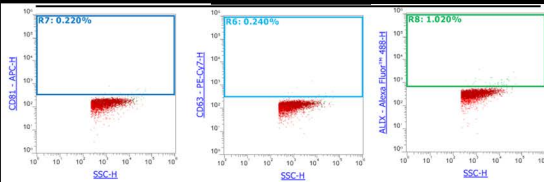

EVs from urine3 (UC)

EVs from MP3 (UC)

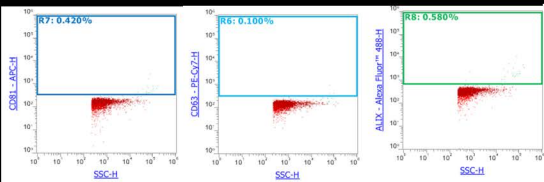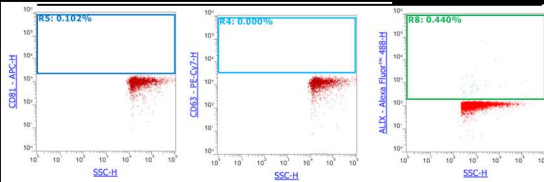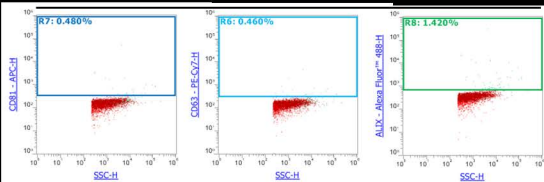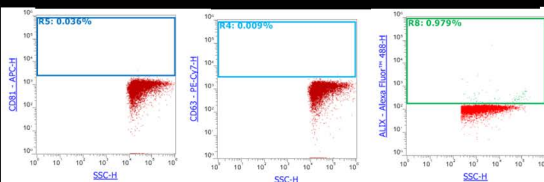

Supplement: s1 [file s1]

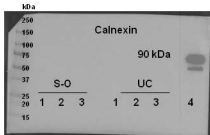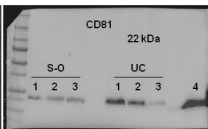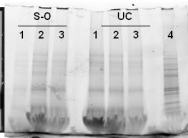

STAIN FREE GEL

1. Plasma EV
2. Colo205 EV
3. 8701BC EV
4. Colo205 cell lysate

Supplement: s1 [file s1]

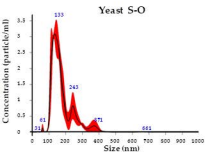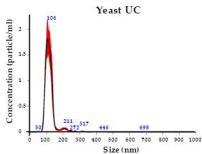

**a**

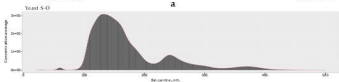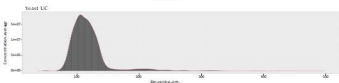

**b**

**HB2 UC**

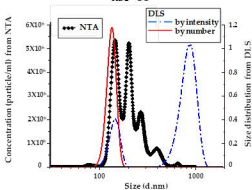

**c**

Supplement: s1 [file s1]

EVs from SH-SY5Y (C5)

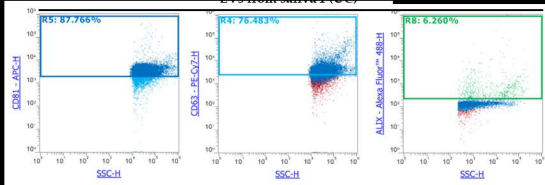

EVs from SH-SY5Y (C6)

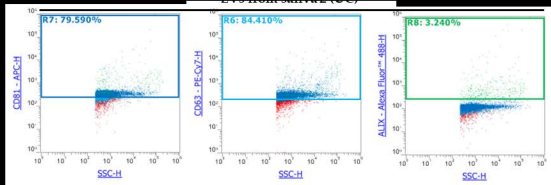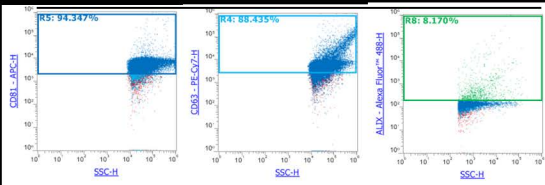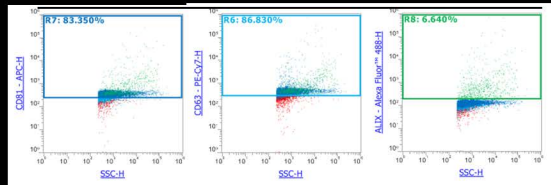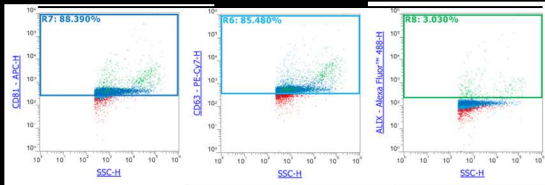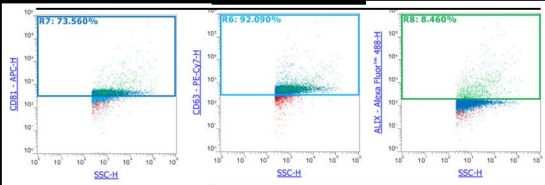

Supplement: s1 [file s1]

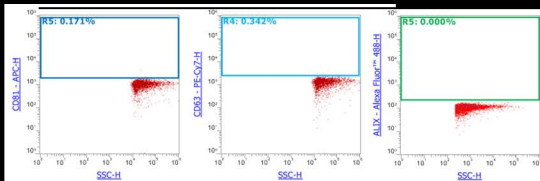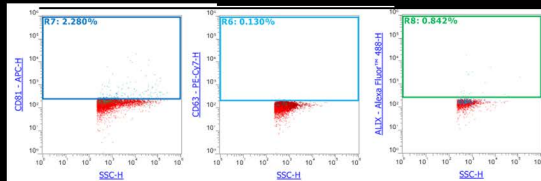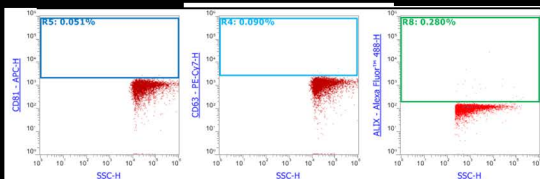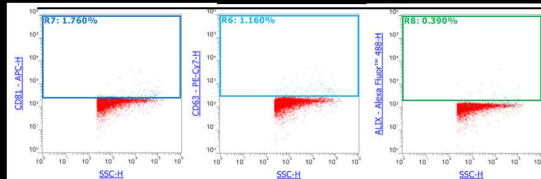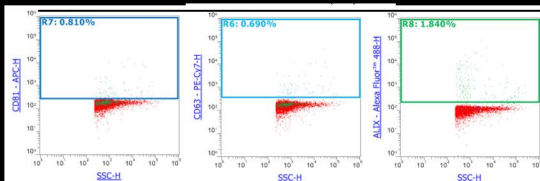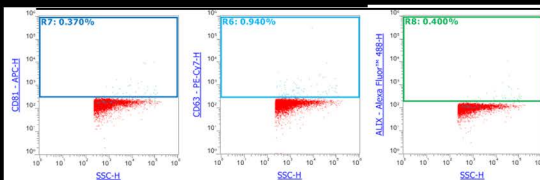

Supplement: s1 [file s1]

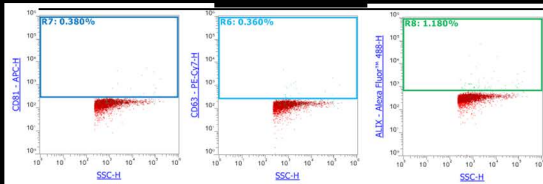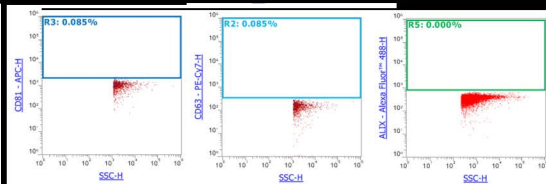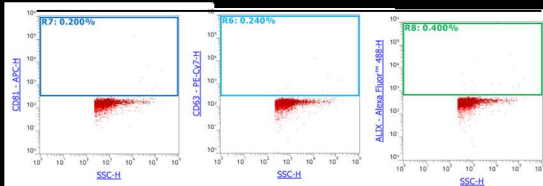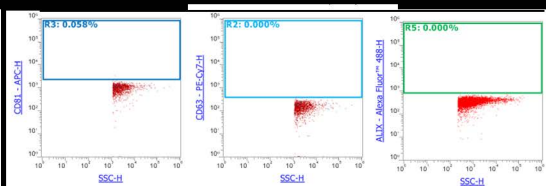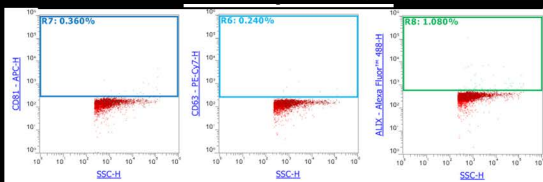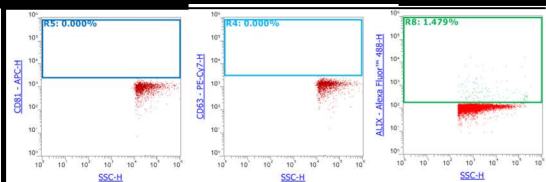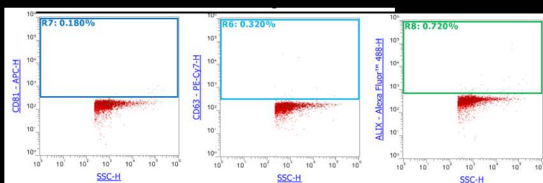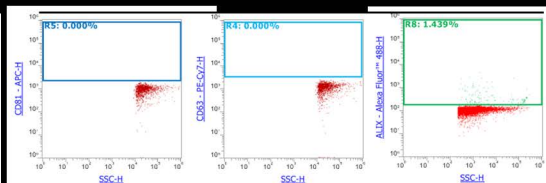

Supplement: s1 [file s1]

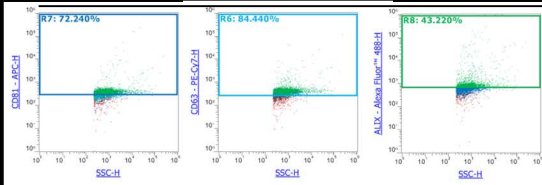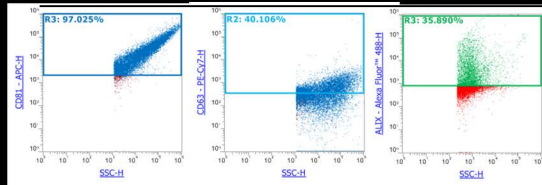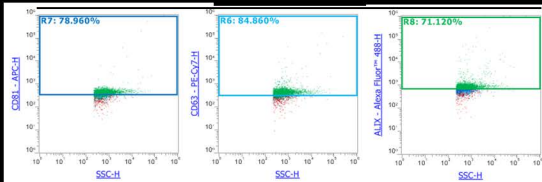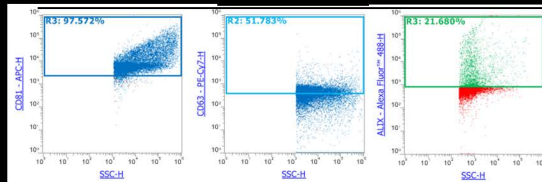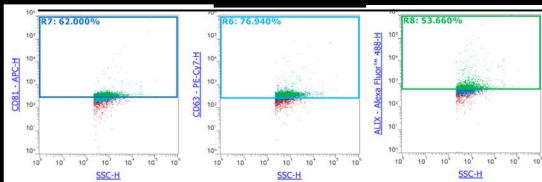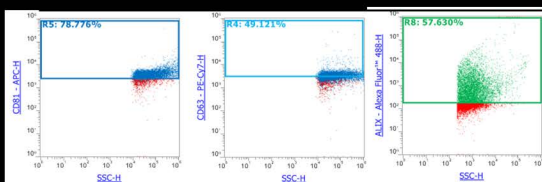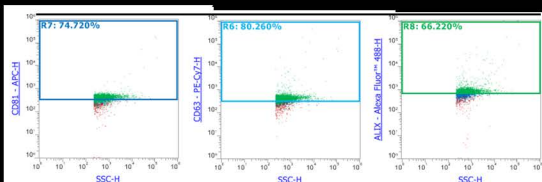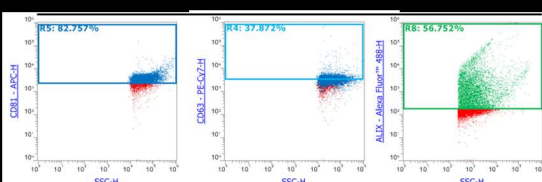

Supplement: s1 [file s1]

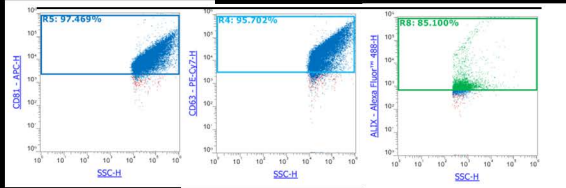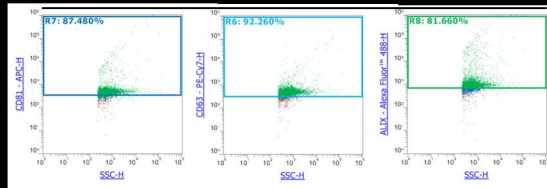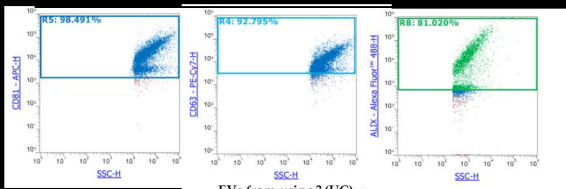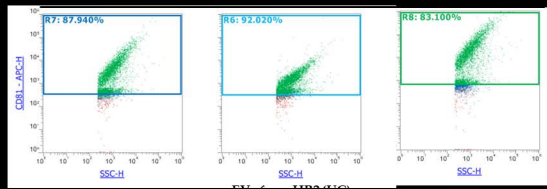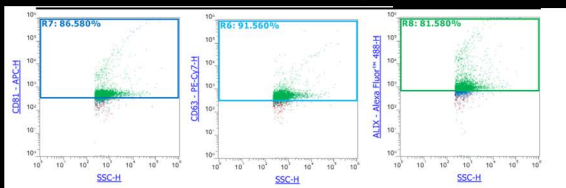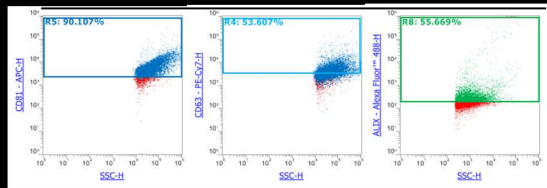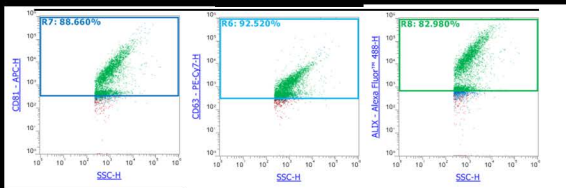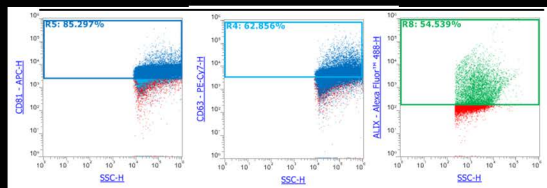

Supplement: s1 [file s1]
